# Supplementary material
Source: PubMed Central journal article supplement (PMC5811188)
Supplement: NIHMS936256-supplement-all.pdf [file NIHMS936256-supplement-all.pdf]

## **Hypertonic saline primes activation of the p53/p21 signaling axis in Human Small Airway Epithelial Cells that prevents inflammation induced by pro-inflammatory cytokines**

Fabia Gamboni,<sup>1</sup> Cameron Anderson,<sup>1</sup> Mitra Sanchayita,<sup>1</sup> Julie A. Reisz,<sup>2</sup> Travis Nemkov,<sup>2</sup> Monika Dzieciatkowska,<sup>2</sup> Kenneth L. Jones,<sup>2</sup> Kirk C. Hansen,<sup>2</sup> Angelo D'Alessandro<sup>2,\*</sup> Anirban Banerjee<sup>\*1</sup>

### **Affiliations:**

<sup>1</sup>Department of Surgery/Trauma Research Center, Mail Stop C-320 Anschutz Medical Campus 12700 E 19th Avenue, Room 6420, Aurora, CO 80045; <sup>2</sup>Department of Biochemistry and Molecular Genetics 12801 E17th Av, RC1 South, Aurora, CO, 80045 - University of Colorado Denver, School of Medicine;

### **\*Corresponding Authors:**

Dr. Anirban Banerjee, PhD  
Department of Surgery/Trauma Research Center, University of Colorado Denver;  
Mail Stop C320; RC2 Building, Lab Space# 6410; Aurora, CO 80045  
Email: [anirban.banerjee@ucdenver.edu](mailto:anirban.banerjee@ucdenver.edu)

Angelo D'Alessandro, PhD  
Department of Biochemistry and Molecular Genetics, University of Colorado Denver Anschutz Medical Campus, 80045 Aurora, CO, USA.  
Tel.: +1 (303) 724-5798; E-mail address: [angelo.dalessandro@ucdenver.edu](mailto:angelo.dalessandro@ucdenver.edu)

### **Running Title:**

*Tp53/p21 activation by hypertonic saline promotes lung cell inflammation*

## **Supplementary Material**

# SUPPLEMENTARY MATERIAL

## TABLE OF CONTENTS

|                                     |           |
|-------------------------------------|-----------|
| <b>SUPPLEMENTARY FIGURES .....</b>  | <b>1</b>  |
| <i>SUPPLEMENTARY FIGURE 1 .....</i> | <i>3</i>  |
| <i>SUPPLEMENTARY FIGURE 2 .....</i> | <i>4</i>  |
| <i>SUPPLEMENTARY FIGURE 3 .....</i> | <i>5</i>  |
| <i>SUPPLEMENTARY FIGURE 4 .....</i> | <i>6</i>  |
| <i>SUPPLEMENTARY FIGURE 5 .....</i> | <i>7</i>  |
| <b>SUPPLEMENTARY TABLE 1 .....</b>  | <b>8</b>  |
| <b>SUPPLEMENTARY TABLE 2 .....</b>  | <b>9</b>  |
| <b>SUPPLEMENTARY TABLE 3 .....</b>  | <b>10</b> |
| <b>SUPPLEMENTARY TABLE 4 .....</b>  | <b>11</b> |

Supplementary Figures

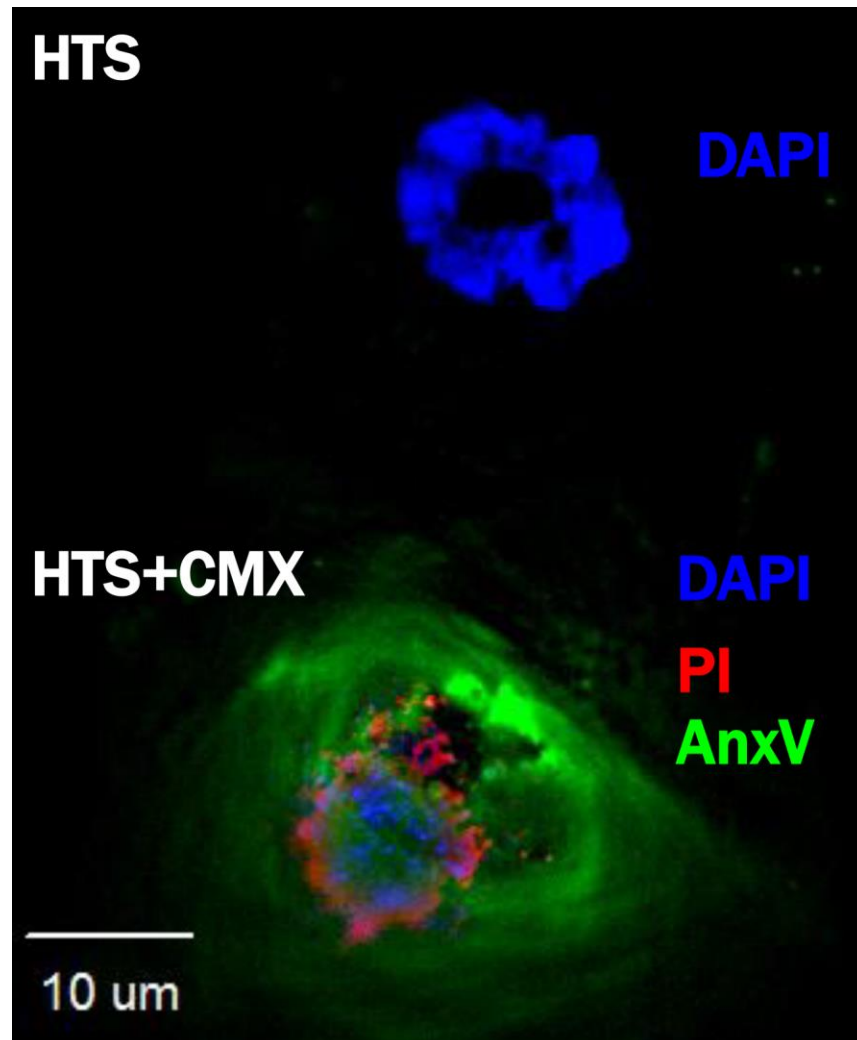

Supplementary Figure 1 – Fluorescent microscopy analysis of apoptosis (Annexin V, as a marker of extracellular phosphatidylserine exposure in green; propidium iodide – PI: red; DAPI: nuclei in blue) in SAECs at 24h from HTS and HTS+CMX treatment.

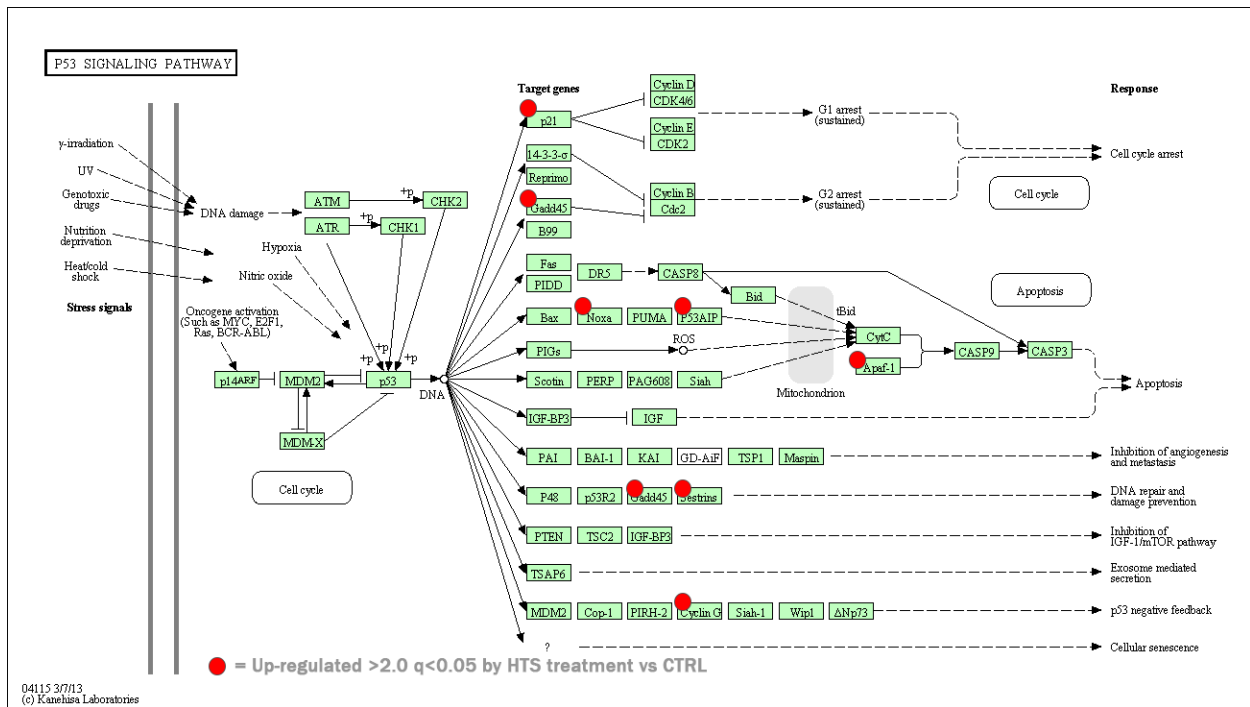

**Supplementary Figure 2 – TP53 family members were up-regulated at the protein level in SAECS following HTS and HTS+CMX treatment**

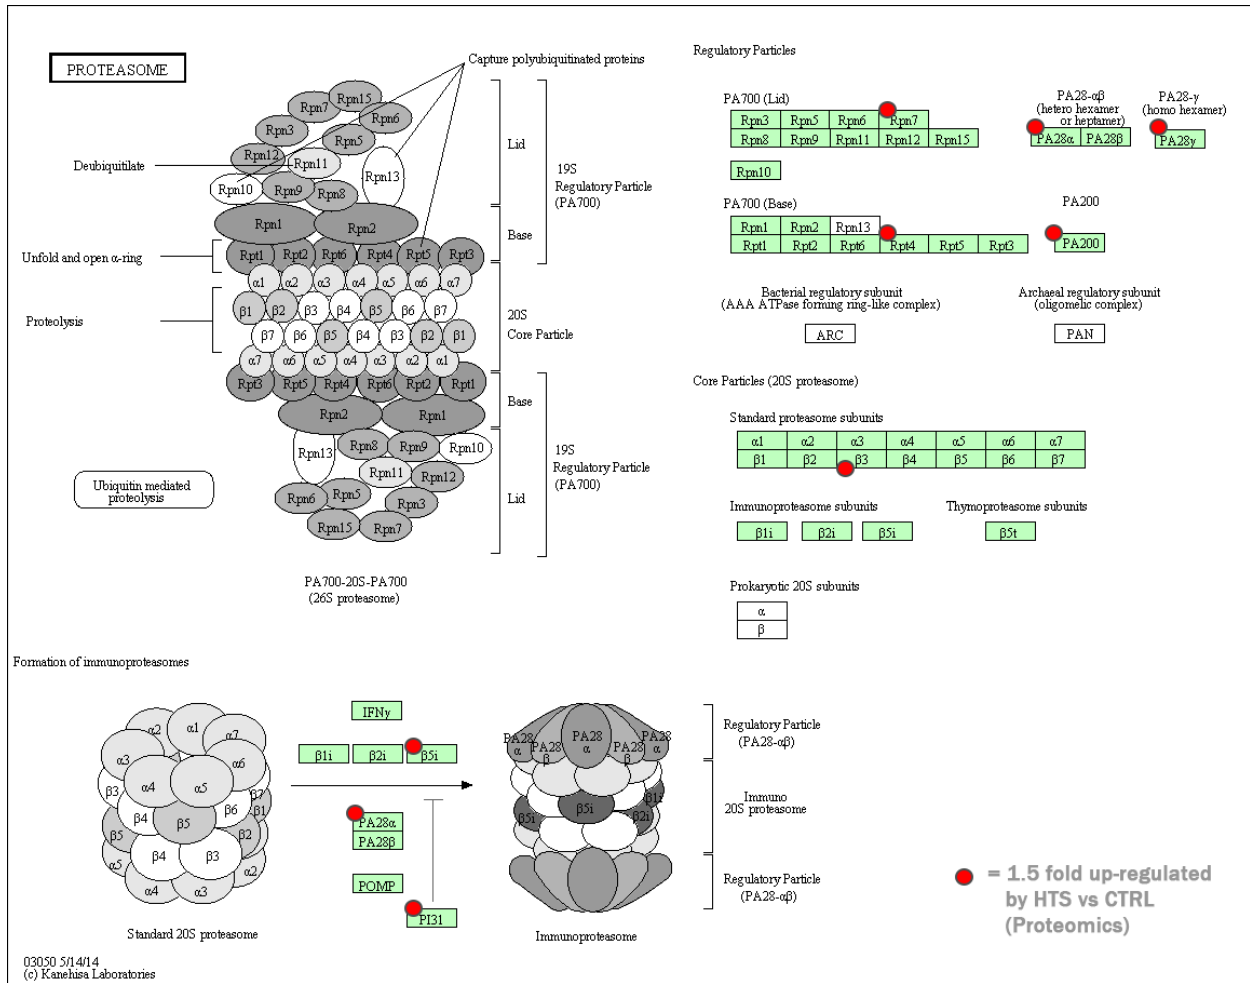

**Supplementary Figure 3 – Proteasome and protein degradation machinery components increasing in SAECs in response to HTS treatment**

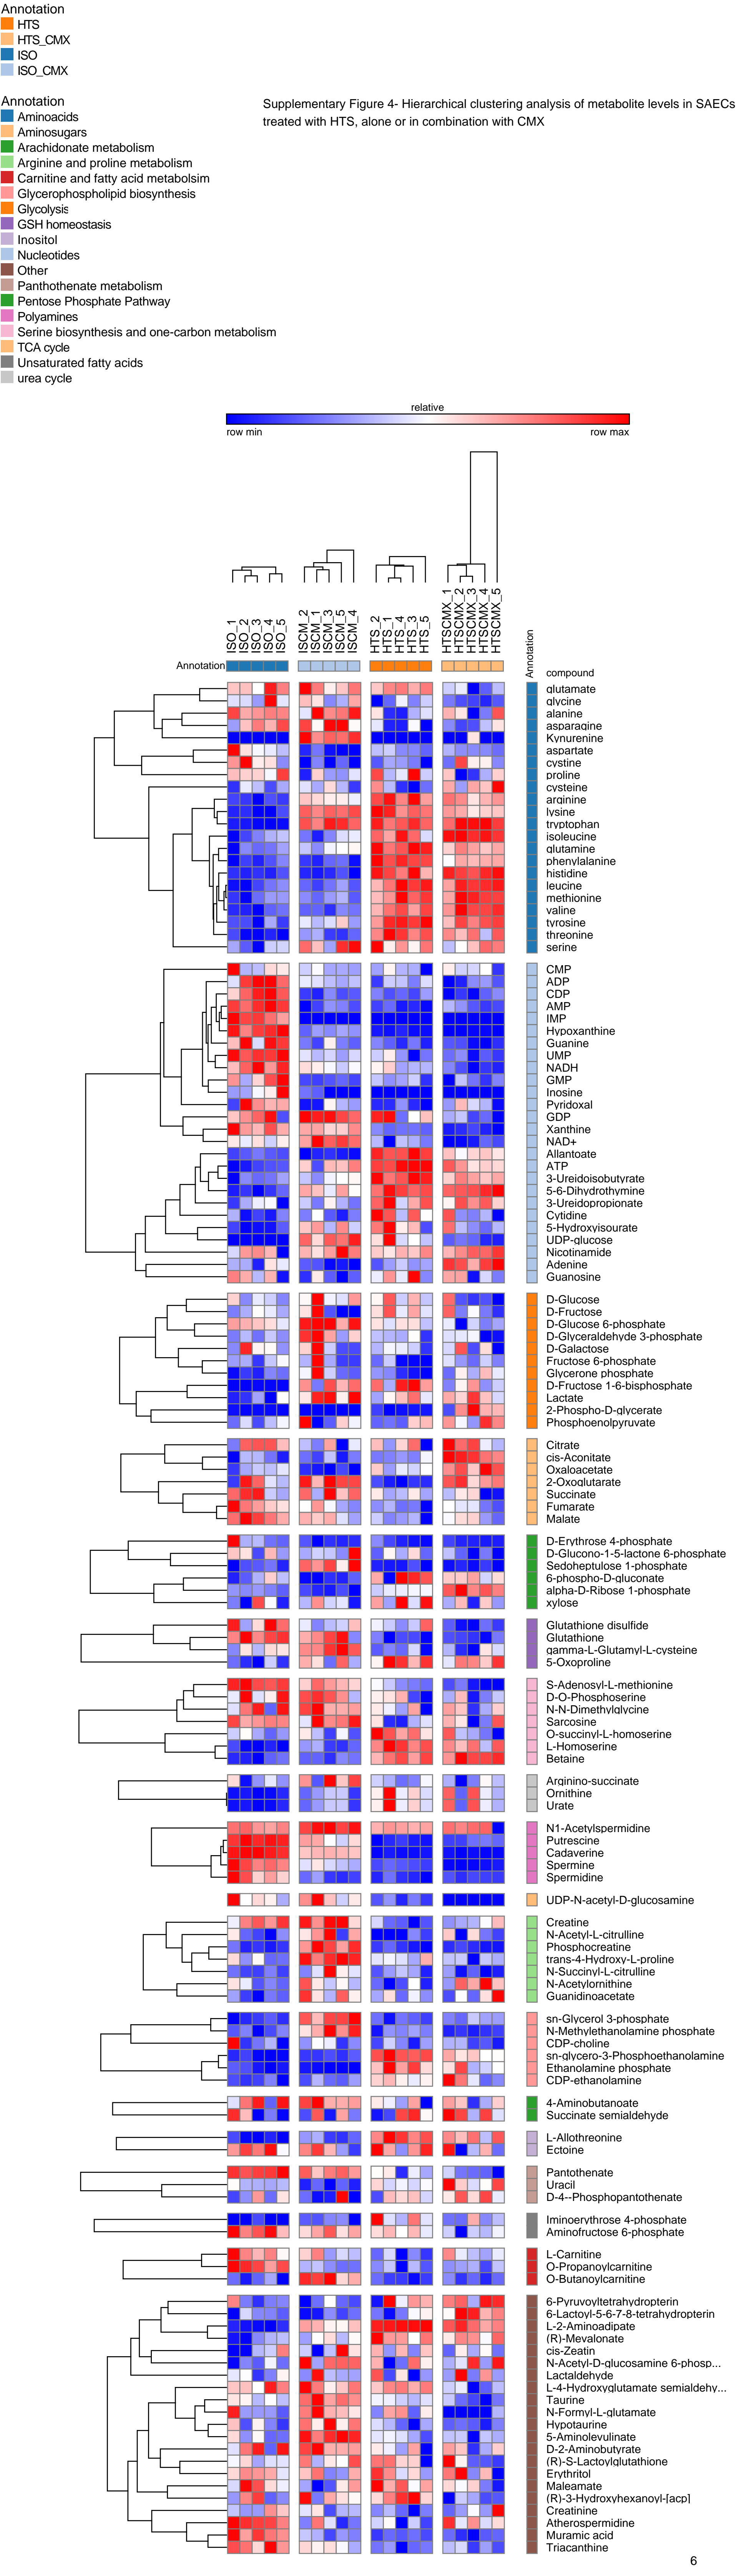

- HTS
- HTS CMX
- HTS No Cells
- ISO
- ISO CMX
- ISO No Cells

- Annotation
- Aminoacids
  - Aminosugars
  - Arachidonate metabolism
  - Arginine and proline metabolism
  - Glycerophospholipid biosynthesis
  - Glycolysis
  - GSH homeostasis
  - Inositol
  - Nucleotides
  - Other
  - Pantothenate metabolism
  - Pentose Phosphate Pathway
  - Polyamines
  - Serine biosynthesis and one-carbon metabolism
  - TCA cycle
  - Unsaturated fatty acids
  - urea cycle

Supplementary Figure 5 – Hierarchical clustering analysis of metabolite levels in culture media of SAECs treated with HTS, alone or in combination with CMX

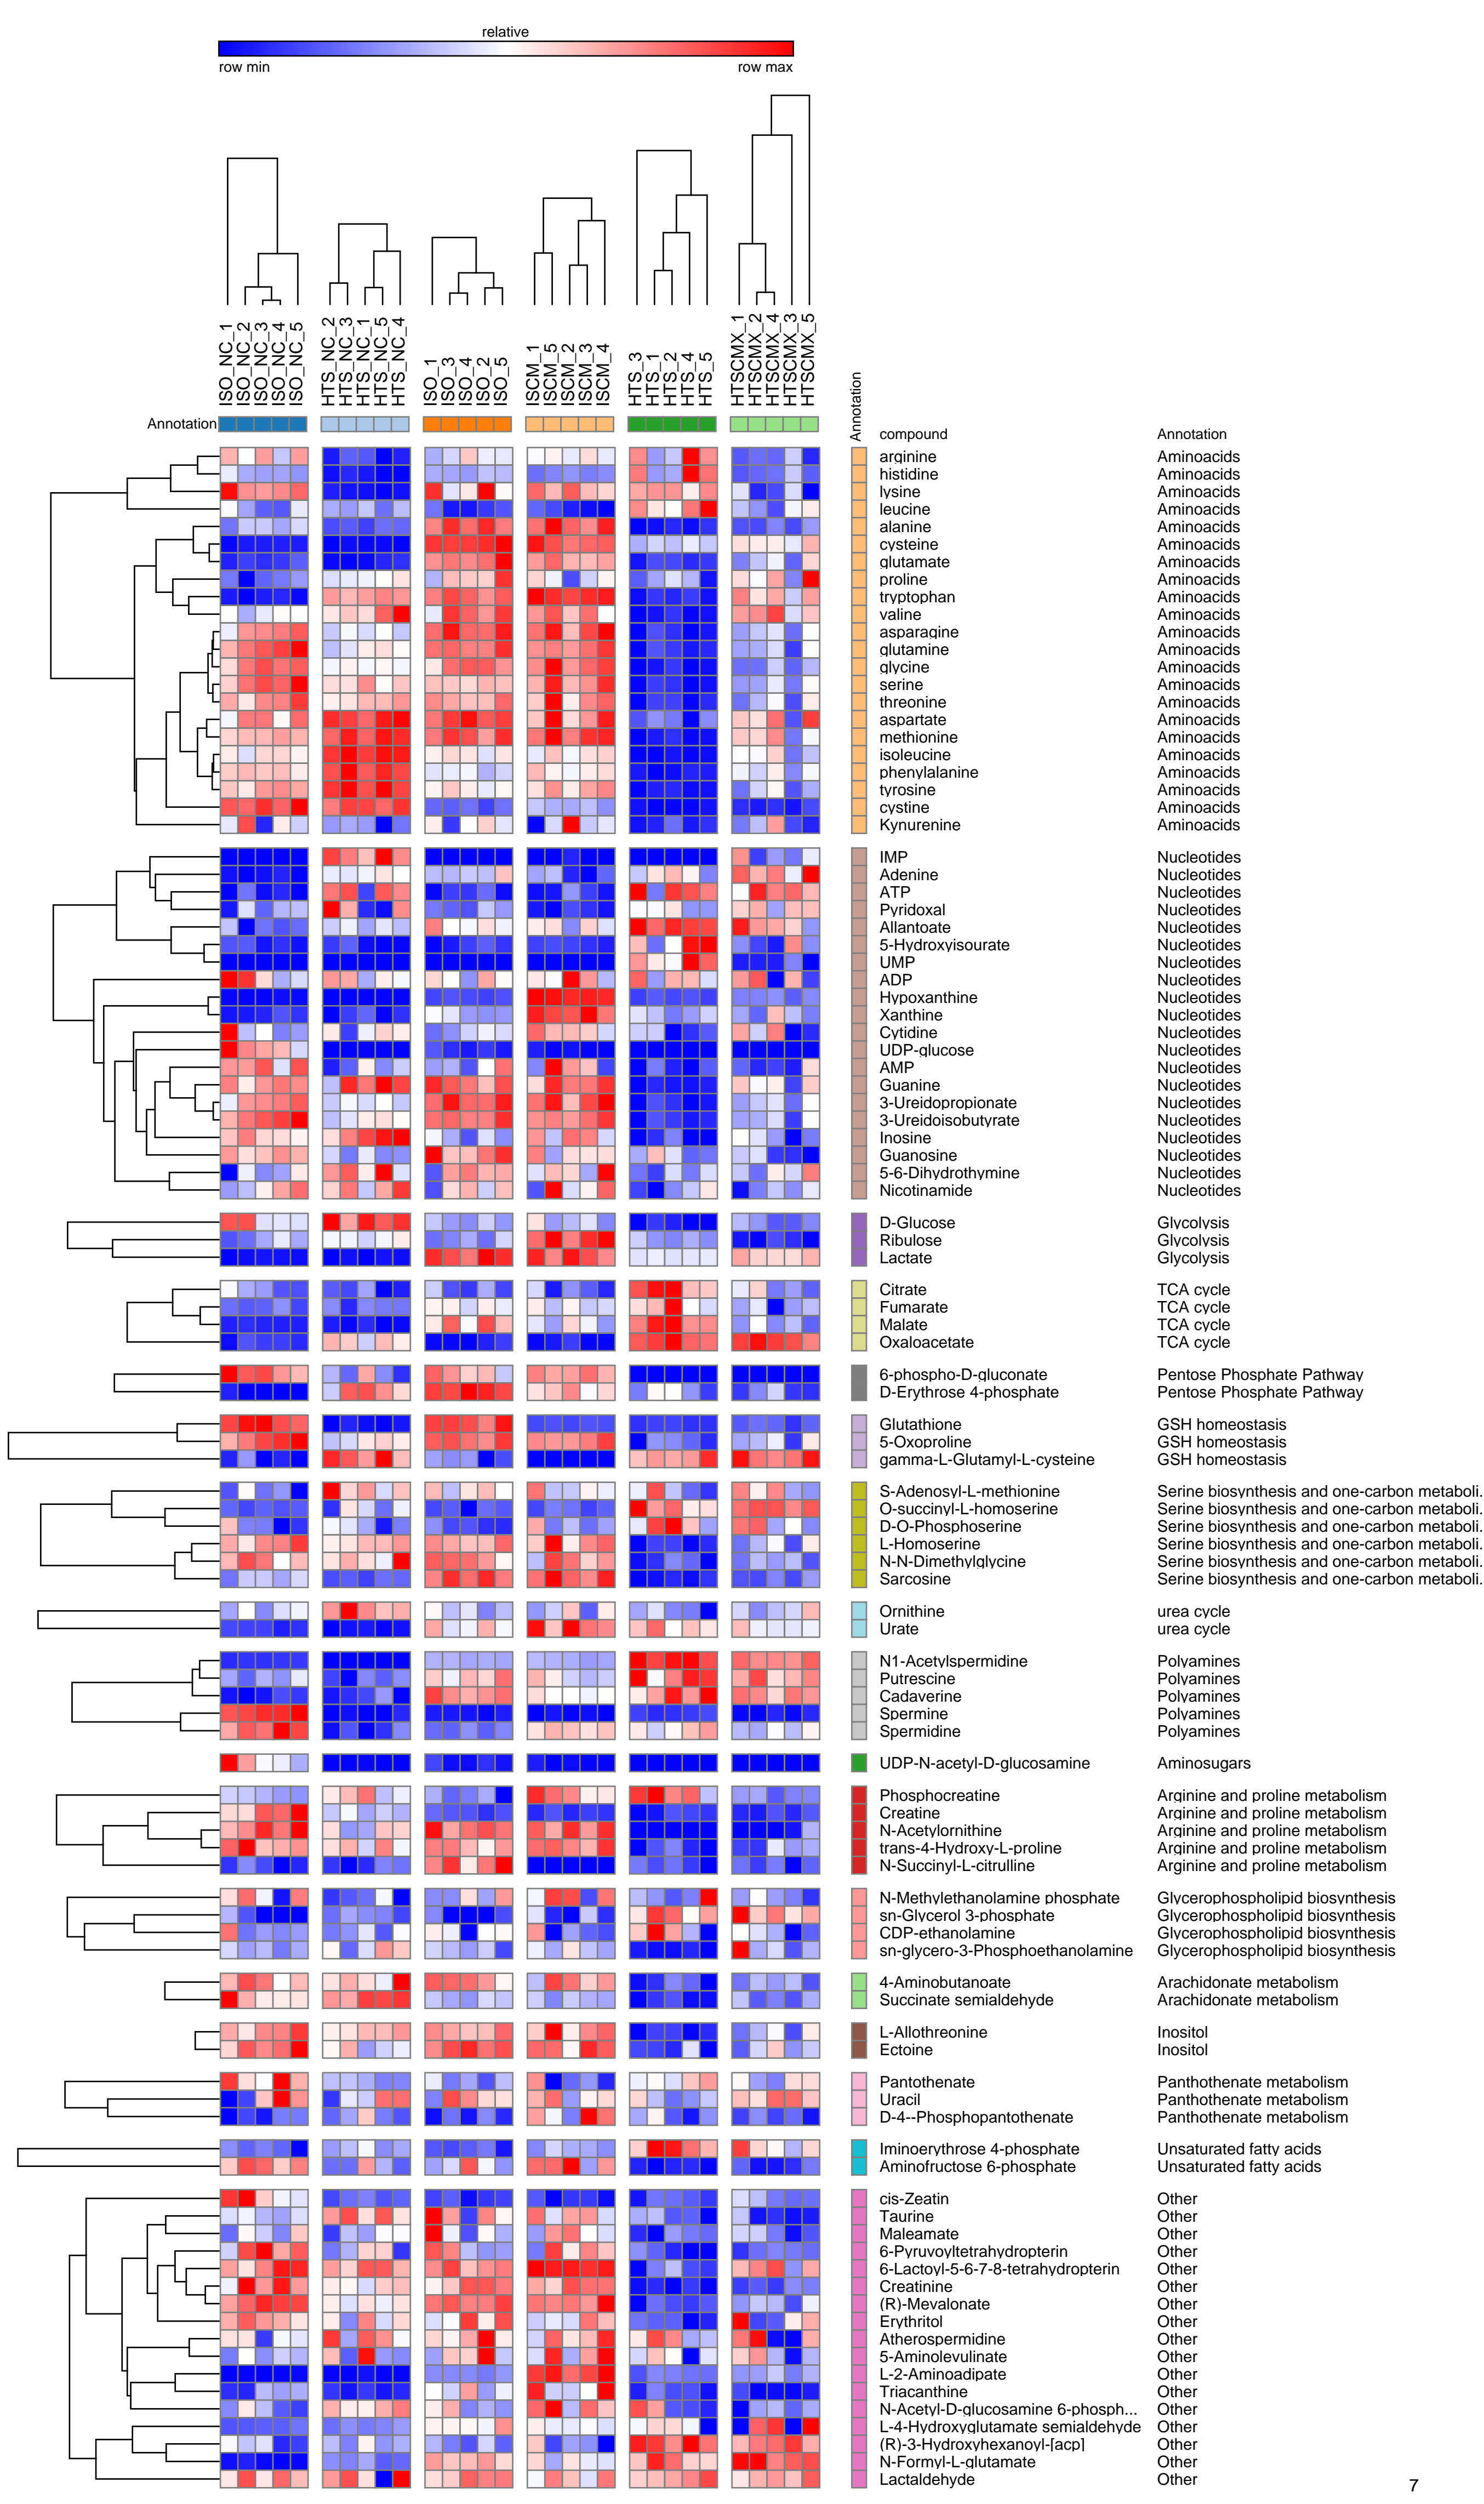



Supplementary Table 1 - Functional enrichment of pathways significantly up-regulated by HTS (extended)

| Category     | Term                                | Count | %        | PValue   | Genes                                                                                                                                                                                                                                                         | List Total | Pop Hits | Pop Total | Fold Enrichment | Bonferroni | Benjamini |
|--------------|-------------------------------------|-------|----------|----------|---------------------------------------------------------------------------------------------------------------------------------------------------------------------------------------------------------------------------------------------------------------|------------|----------|-----------|-----------------|------------|-----------|
| KEGG_PATHWAY | hsa04115:p53 signaling pathway      | 8     | 2.996255 | 1.12E-04 | ENSG00000099860, ENSG00000120868, ENSG00000138764, ENSG00000149212, ENSG00000120471, ENSG00000124762, ENSG00000130766, ENSG00000141682                                                                                                                        | 85         | 68       | 5085      | 7.038           | 0.009      | 0.009     |
| KEGG_PATHWAY | hsa04010:MAPK signaling pathway     | 14    | 5.243446 | 3.75E-04 | ENSG00000123358, ENSG00000197461, ENSG00000170345, ENSG00000106799, ENSG00000099860, ENSG00000155903, ENSG00000143507, ENSG00000134259, ENSG00000161326, ENSG00000139318, ENSG00000128591, ENSG00000130522, ENSG00000128272, ENSG00000120129                  | 85         | 267      | 5085      | 3.137           | 0.029      | 0.015     |
| KEGG_PATHWAY | hsa05219:Bladder cancer             | 6     | 2.247191 | 5.74E-04 | ENSG00000100985, ENSG00000119630, ENSG00000112715, ENSG00000150630, ENSG00000124762, ENSG00000169429                                                                                                                                                          | 85         | 42       | 5085      | 8.546           | 0.044      | 0.015     |
| KEGG_PATHWAY | hsa05200:Pathways in cancer         | 15    | 5.617978 | 8.33E-04 | ENSG00000112715, ENSG00000073756, ENSG00000150630, ENSG00000197461, ENSG00000076604, ENSG00000170345, ENSG00000005339, ENSG00000106799, ENSG00000100985, ENSG00000119630, ENSG00000159216, ENSG00000147883, ENSG00000124762, ENSG00000169429, ENSG00000110395 | 85         | 328      | 5085      | 2.736           | 0.063      | 0.016     |
| KEGG_PATHWAY | hsa04330:Notch signaling pathway    | 5     | 1.872659 | 0.007204 | ENSG00000184916, ENSG00000005339, ENSG00000100060, ENSG00000106003, ENSG00000198719                                                                                                                                                                           | 85         | 47       | 5085      | 6.364205257     | 0.4310344  | 0.1066591 |
| KEGG_PATHWAY | hsa04350:TGF-beta signaling pathway | 6     | 2.247191 | 0.01399  | ENSG00000101665, ENSG00000108854, ENSG00000115738, ENSG00000147883, ENSG00000005339, ENSG00000106799                                                                                                                                                          | 85         | 87       | 5085      | 4.125760649     | 0.6667761  | 0.1673624 |
| KEGG_PATHWAY | hsa04012:ErbB signaling pathway     | 6     | 2.247191 | 0.01399  | ENSG00000143322, ENSG00000157168, ENSG00000124882, ENSG00000124762, ENSG00000113070, ENSG00000110395, ENSG00000119630, ENSG00000154803, ENSG00000112715, ENSG00000150630, ENSG00000005339                                                                     | 85         | 87       | 5085      | 4.125760649     | 0.6667761  | 0.1673624 |
| KEGG_PATHWAY | hsa05211:Renal cell carcinoma       | 5     | 1.872659 | 0.027851 | ENSG00000005339                                                                                                                                                                                                                                               | 85         | 70       | 5085      | 4.273109244     | 0.8895545  | 0.2700269 |



Supplementary Table 3 - Proteomics report

| Identified Proteins (2186) | Uniprot ID                                                              | MW (kDa)    | Iso | Iso+Cmx | HTS | HTS+Cmx | FC Iso+Cmx/Iso | FC HTS/Iso | FC HTS+Cmx/Iso |         |
|----------------------------|-------------------------------------------------------------------------|-------------|-----|---------|-----|---------|----------------|------------|----------------|---------|
| 2                          | 1,2-dihydroxy-3-keto-5-methylthiopentane dioxygenase ADI1               | Q9BV57      | 21  | 0       | 3   | 3       | 0              | #DIV/0!    | #DIV/0!        | #DIV/0! |
| 3                          | 1,4-alpha-glucan-branching enzyme GBE1                                  | Q04446      | 80  | 15      | 25  | 23      | 26             | 1.67       | 1.53           | 1.73    |
| 4                          | 10 kDa heat shock protein, mitochondrial HSPE1                          | P61604      | 11  | 24      | 23  | 31      | 25             | 0.96       | 1.29           | 1.04    |
| 5                          | 116 kDa US small nuclear ribonucleoprotein component EFTUD2             | Q15029      | 109 | 15      | 6   | 14      | 14             | 0.40       | 0.93           | 0.93    |
| 6                          | 14 kDa phosphohistidine phosphatase PHPT1                               | Q9NRX4      | 14  | 5       | 2   | 4       | 6              | 0.40       | 0.80           | 1.20    |
| 7                          | 14-3-3 protein beta/alpha YWHAB                                         | P31946      | 28  | 93      | 119 | 123     | 136            | 1.28       | 1.32           | 1.46    |
| 8                          | 14-3-3 protein epsilon YWHA E                                           | P62258      | 29  | 170     | 177 | 197     | 200            | 1.04       | 1.16           | 1.18    |
| 9                          | 14-3-3 protein eta YWHAH                                                | Q04917      | 28  | 54      | 57  | 47      | 95             | 1.06       | 0.87           | 1.76    |
| 10                         | 14-3-3 protein gamma YWHAG                                              | P61981      | 28  | 92      | 111 | 125     | 122            | 1.21       | 1.36           | 1.33    |
| 11                         | 14-3-3 protein sigma SFN                                                | P31947      | 28  | 190     | 216 | 212     | 282            | 1.14       | 1.12           | 1.48    |
| 12                         | 14-3-3 protein theta YWHAQ                                              | P27348      | 28  | 124     | 141 | 145     | 150            | 1.14       | 1.17           | 1.21    |
| 13                         | 14-3-3 protein zeta/delta YWHAZ                                         | P63104      | 28  | 178     | 217 | 213     | 242            | 1.22       | 1.20           | 1.36    |
| 14                         | 15 kDa selenoprotein SEP15                                              | O60613      | 18  | 8       | 3   | 5       | 3              | 0.38       | 0.63           | 0.38    |
| 15                         | 182 kDa tankyrase-1-binding protein TNKS1BP1                            | Q9C0C2      | 182 | 69      | 73  | 87      | 71             | 1.06       | 1.26           | 1.03    |
| 16                         | 1-phosphatidylinositol 4,5-bisphosphate phosphodiesterase beta-3 PLCB3  | Q01970      | 139 | 8       | 14  | 16      | 14             | 1.75       | 2.00           | 1.75    |
| 17                         | 1-phosphatidylinositol 4,5-bisphosphate phosphodiesterase delta-1 PLCD1 | P51178      | 86  | 9       | 6   | 8       | 4              | 0.67       | 0.89           | 0.44    |
| 18                         | 1-phosphatidylinositol 4,5-bisphosphate phosphodiesterase delta-3 PLCD3 | Q8N3E9      | 89  | 0       | 0   | 3       | 0              | #DIV/0!    | #DIV/0!        | #DIV/0! |
| 19                         | 1-phosphatidylinositol 4,5-bisphosphate phosphodiesterase gamma-1 PLCG1 | P19174      | 149 | 2       | 0   | 3       | 0              | 0.00       | 1.50           | 0.00    |
| 20                         | 2,4-dienoyl-CoA reductase, mitochondrial DECR1                          | Q16698      | 36  | 5       | 4   | 3       | 5              | 0.80       | 0.60           | 1.00    |
| 21                         | 2',5'-phosphodiesterase 12 PDE12                                        | O61807      | 67  | 0       | 0   | 2       | 0              | #DIV/0!    | #DIV/0!        | #DIV/0! |
| 22                         | 26S protease regulatory subunit 10B PSMC6                               | P62333      | 44  | 10      | 21  | 17      | 17             | 2.10       | 1.70           | 1.70    |
| 23                         | 26S protease regulatory subunit 4 PSMC1                                 | P62191      | 49  | 34      | 30  | 32      | 30             | 0.88       | 0.94           | 0.88    |
| 24                         | 26S protease regulatory subunit 6A PSMC3                                | P17980      | 49  | 19      | 18  | 25      | 23             | 0.95       | 1.32           | 1.21    |
| 25                         | 26S protease regulatory subunit 6B PSMC4                                | P43686      | 47  | 28      | 20  | 29      | 29             | 0.71       | 1.04           | 1.04    |
| 26                         | 26S protease regulatory subunit 7 PSMC2                                 | P35998      | 49  | 35      | 22  | 33      | 25             | 0.63       | 0.94           | 0.71    |
| 27                         | 26S protease regulatory subunit 8 PSMC5                                 | P62195      | 46  | 24      | 32  | 22      | 21             | 1.33       | 0.92           | 0.88    |
| 28                         | 26S proteasome non-ATPase regulatory subunit 1 PSMD1                    | Q99460      | 106 | 51      | 43  | 59      | 48             | 0.84       | 1.16           | 0.94    |
| 29                         | 26S proteasome non-ATPase regulatory subunit 10 PSMD10                  | O75832      | 24  | 6       | 6   | 6       | 5              | 1.00       | 1.00           | 0.83    |
| 30                         | 26S proteasome non-ATPase regulatory subunit 11 PSMD11                  | O00231      | 47  | 44      | 37  | 35      | 34             | 0.84       | 0.80           | 0.77    |
| 31                         | 26S proteasome non-ATPase regulatory subunit 12 PSMD12                  | O00232      | 53  | 30      | 26  | 30      | 31             | 0.87       | 1.00           | 1.03    |
| 32                         | 26S proteasome non-ATPase regulatory subunit 13 PSMD13                  | Q9UNM6      | 43  | 36      | 34  | 32      | 41             | 0.94       | 0.89           | 1.14    |
| 33                         | 26S proteasome non-ATPase regulatory subunit 14 PSMD14                  | O00487      | 35  | 22      | 17  | 19      | 16             | 0.77       | 0.86           | 0.73    |
| 34                         | 26S proteasome non-ATPase regulatory subunit 2 PSMD2                    | Q13200      | 100 | 128     | 83  | 96      | 87             | 0.65       | 0.75           | 0.68    |
| 35                         | 26S proteasome non-ATPase regulatory subunit 3 PSMD3                    | O43242      | 61  | 27      | 41  | 29      | 31             | 1.52       | 1.07           | 1.15    |
| 36                         | 26S proteasome non-ATPase regulatory subunit 4 PSMD4                    | P55036      | 41  | 5       | 4   | 6       | 4              | 0.80       | 1.20           | 0.80    |
| 37                         | 26S proteasome non-ATPase regulatory subunit 5 PSMD5                    | Q16401      | 56  | 13      | 18  | 20      | 17             | 1.38       | 1.54           | 1.31    |
| 38                         | 26S proteasome non-ATPase regulatory subunit 6 PSMD6                    | Q15008      | 46  | 13      | 23  | 26      | 21             | 1.77       | 2.00           | 1.62    |
| 39                         | 26S proteasome non-ATPase regulatory subunit 7 PSMD7                    | P51665      | 37  | 14      | 14  | 12      | 15             | 1.00       | 0.86           | 1.07    |
| 40                         | 26S proteasome non-ATPase regulatory subunit 8 PSMD8                    | P48556      | 40  | 12      | 18  | 16      | 15             | 1.50       | 1.33           | 1.25    |
| 41                         | 26S proteasome non-ATPase regulatory subunit 9 PSMD9                    | O00233      | 25  | 3       | 7   | 6       | 5              | 2.33       | 2.00           | 1.67    |
| 42                         | 28 kDa heat- and acid-stable phosphoprotein PDAP1                       | Q13442      | 21  | 4       | 5   | 4       | 3              | 1.25       | 1.00           | 0.75    |
| 43                         | 28S ribosomal protein S16, mitochondrial MRPS16                         | Q9Y3D3      | 15  | 4       | 0   | 3       | 4              | 0.00       | 0.75           | 1.00    |
| 44                         | 28S ribosomal protein S17, mitochondrial MRPS17                         | Q9Y2R5      | 15  | 2       | 0   | 0       | 0              | 0.00       | 0.00           | 0.00    |
| 45                         | 28S ribosomal protein S23, mitochondrial MRPS23                         | Q9Y3D9      | 22  | 0       | 2   | 0       | 0              | #DIV/0!    | #DIV/0!        | #DIV/0! |
| 46                         | 28S ribosomal protein S34, mitochondrial MRPS34                         | P82930      | 26  | 4       | 3   | 0       | 3              | 0.75       | 0.00           | 0.75    |
| 47                         | 28S ribosomal protein S36, mitochondrial MRPS36                         | P82909      | 11  | 13      | 9   | 12      | 7              | 0.69       | 0.92           | 0.54    |
| 48                         | 28S ribosomal protein S6, mitochondrial MRPS6                           | P82932      | 14  | 4       | 0   | 0       | 0              | 0.00       | 0.00           | 0.00    |
| 49                         | 2'-deoxynucleoside 5'-phosphate N-hydrolase 1 DNPH1                     | O43598      | 19  | 7       | 6   | 7       | 0              | 0.86       | 1.00           | 0.00    |
| 50                         | 2-oxoglutarate dehydrogenase, mitochondrial OGDH                        | Q02218      | 116 | 23      | 23  | 20      | 18             | 1.00       | 0.87           | 0.78    |
| 51                         | 3'(2'),5'-bisphosphate nucleotidase 1 BPNT1                             | O95861      | 33  | 5       | 6   | 8       | 11             | 1.20       | 1.60           | 2.20    |
| 52                         | 39S ribosomal protein L14, mitochondrial MRPL14                         | Q6P1L8      | 16  | 0       | 0   | 4       | 0              | #DIV/0!    | #DIV/0!        | #DIV/0! |
| 53                         | 39S ribosomal protein L41, mitochondrial MRPL41                         | Q8XM3       | 15  | 4       | 4   | 5       | 4              | 1.00       | 1.25           | 1.00    |
| 54                         | 39S ribosomal protein L44, mitochondrial MRPL44                         | Q9H9J2      | 38  | 0       | 0   | 3       | 0              | #DIV/0!    | #DIV/0!        | #DIV/0! |
| 55                         | 3-beta-hydroxysteroid-Delta(8),Delta(7)-isomerase EBP                   | Q11525      | 26  | 3       | 0   | 0       | 9              | 0.00       | 0.00           | 3.00    |
| 56                         | 3-hydroxyacyl-CoA dehydrogenase type-2 HSD17B10                         | Q99714      | 27  | 26      | 23  | 25      | 32             | 0.88       | 0.96           | 1.23    |
| 57                         | 3-hydroxyisobutyrate dehydrogenase, mitochondrial HIBADH                | P31937      | 35  | 0       | 0   | 2       | 0              | #DIV/0!    | #DIV/0!        | #DIV/0! |
| 58                         | 3-hydroxyisobutyryl-CoA hydrolase, mitochondrial HIBCH                  | Q6NVY1      | 43  | 0       | 3   | 0       | 3              | #DIV/0!    | #DIV/0!        | #DIV/0! |
| 59                         | 3-ketoacyl-CoA thiolase, mitochondrial ACAA2                            | P42765      | 42  | 0       | 0   | 2       | 2              | #DIV/0!    | #DIV/0!        | #DIV/0! |
| 60                         | 3-ketoacyl-CoA thiolase, peroxisomal ACAA1                              | P09110      | 44  | 6       | 9   | 7       | 4              | 1.50       | 1.17           | 0.67    |
| 61                         | 3-ketodihydroxyphingosine reductase KDSR                                | Q06136      | 36  | 0       | 2   | 0       | 0              | #DIV/0!    | #DIV/0!        | #DIV/0! |
| 62                         | 3-mercaptopyruvate sulfurtransferase MPST                               | P25325      | 33  | 11      | 8   | 9       | 8              | 0.73       | 0.82           | 0.73    |
| 63                         | 40S ribosomal protein S10 RPS10                                         | P46783      | 19  | 37      | 37  | 27      | 24             | 1.00       | 0.73           | 0.65    |
| 64                         | 40S ribosomal protein S11 RPS11                                         | P62280      | 18  | 38      | 38  | 34      | 35             | 1.00       | 0.89           | 0.92    |
| 65                         | 40S ribosomal protein S12 RPS12                                         | P25398      | 15  | 38      | 39  | 38      | 32             | 1.03       | 1.00           | 0.84    |
| 66                         | 40S ribosomal protein S13 RPS13                                         | P62277      | 17  | 36      | 30  | 25      | 35             | 0.83       | 0.69           | 0.97    |
| 67                         | 40S ribosomal protein S14 RPS14                                         | P62263      | 16  | 30      | 25  | 20      | 26             | 0.83       | 0.67           | 0.87    |
| 68                         | 40S ribosomal protein S15 RPS15                                         | P62841      | 17  | 16      | 17  | 15      | 16             | 1.06       | 0.94           | 1.00    |
| 69                         | 40S ribosomal protein S15a RPS15A                                       | P62244      | 15  | 36      | 39  | 34      | 38             | 1.08       | 0.94           | 1.06    |
| 70                         | 40S ribosomal protein S16 RPS16                                         | P62249      | 16  | 33      | 29  | 23      | 44             | 0.88       | 0.70           | 1.33    |
| 71                         | 40S ribosomal protein S17 RPS17                                         | P08708 (+1) | 16  | 50      | 52  | 40      | 52             | 1.04       | 0.80           | 1.04    |
| 72                         | 40S ribosomal protein S18 RPS18                                         | P62269      | 18  | 53      | 47  | 41      | 46             | 0.89       | 0.77           | 0.87    |
| 73                         | 40S ribosomal protein S19 RPS19                                         | P39019      | 16  | 37      | 42  | 36      | 54             | 1.14       | 0.97           | 1.46    |
| 74                         | 40S ribosomal protein S2 RPS2                                           | P15880      | 31  | 34      | 33  | 50      | 47             | 0.97       | 1.47           | 1.38    |
| 75                         | 40S ribosomal protein S20 RPS20                                         | P60866      | 13  | 10      | 5   | 9       | 23             | 0.50       | 0.90           | 2.30    |
| 76                         | 40S ribosomal protein S21 RPS21                                         | P63220      | 9   | 14      | 11  | 12      | 5              | 0.79       | 0.86           | 0.36    |
| 77                         | 40S ribosomal protein S23 RPS23                                         | P62266      | 16  | 30      | 18  | 13      | 21             | 0.60       | 0.43           | 0.70    |
| 78                         | 40S ribosomal protein S24 RPS24                                         | P62847      | 15  | 17      | 18  | 18      | 18             | 1.06       | 1.06           | 1.06    |
| 79                         | 40S ribosomal protein S25 RPS25                                         | P62851      | 14  | 27      | 27  | 22      | 27             | 1.00       | 0.81           | 1.00    |

|     |                                                                  |        |     |     |     |     |     |         |         |         |
|-----|------------------------------------------------------------------|--------|-----|-----|-----|-----|-----|---------|---------|---------|
| 80  | 40S ribosomal protein S26 RPS26                                  | P62854 | 13  | 28  | 20  | 22  | 23  | 0.71    | 0.79    | 0.82    |
| 81  | 40S ribosomal protein S27 RPS27                                  | P42677 | 9   | 29  | 21  | 26  | 20  | 0.72    | 0.90    | 0.69    |
| 82  | 40S ribosomal protein S28 RPS28                                  | P62857 | 8   | 8   | 8   | 9   | 8   | 1.00    | 1.13    | 1.00    |
| 83  | 40S ribosomal protein S29 RPS29                                  | P62273 | 7   | 14  | 13  | 11  | 8   | 0.93    | 0.79    | 0.57    |
| 84  | 40S ribosomal protein S3 RPS3                                    | P23396 | 27  | 83  | 81  | 98  | 125 | 0.98    | 1.18    | 1.51    |
| 85  | 40S ribosomal protein S30 FAU                                    | P62861 | 7   | 8   | 5   | 8   | 7   | 0.63    | 1.00    | 0.88    |
| 86  | 40S ribosomal protein S3a RPS3A                                  | P61247 | 30  | 32  | 39  | 34  | 29  | 1.22    | 1.06    | 0.91    |
| 87  | 40S ribosomal protein S4, X isoform RPS4X                        | P62701 | 30  | 47  | 49  | 52  | 57  | 1.04    | 1.11    | 1.21    |
| 88  | 40S ribosomal protein S5 RPS5                                    | P46782 | 23  | 64  | 67  | 61  | 51  | 1.05    | 0.95    | 0.80    |
| 89  | 40S ribosomal protein S6 RPS6                                    | P62753 | 29  | 17  | 15  | 22  | 27  | 0.88    | 1.29    | 1.59    |
| 90  | 40S ribosomal protein S7 RPS7                                    | P62081 | 22  | 66  | 59  | 62  | 48  | 0.89    | 0.94    | 0.73    |
| 91  | 40S ribosomal protein S8 RPS8                                    | P62241 | 24  | 29  | 27  | 27  | 42  | 0.93    | 0.93    | 1.45    |
| 92  | 40S ribosomal protein S9 RPS9                                    | P46781 | 23  | 46  | 52  | 49  | 34  | 1.13    | 1.07    | 0.74    |
| 93  | 40S ribosomal protein SA RPSA                                    | P08865 | 33  | 46  | 56  | 53  | 53  | 1.22    | 1.15    | 1.15    |
| 94  | 4-aminobutyrate aminotransferase, mitochondrial ABAT             | P80404 | 56  | 0   | 0   | 2   | 0   | #DIV/0! | #DIV/0! | #DIV/0! |
| 95  | 4F2 cell-surface antigen heavy chain SLC3A2                      | P08195 | 68  | 59  | 63  | 67  | 67  | 1.07    | 1.14    | 1.14    |
| 96  | 4-trimethylaminobutyraldehyde dehydrogenase ALDH9A1              | P49189 | 54  | 5   | 4   | 7   | 10  | 0.80    | 1.40    | 2.00    |
| 97  | 5'(3')-deoxyribonucleotidase, cytosolic type NT5C                | Q8TCD5 | 23  | 0   | 0   | 3   | 2   | #DIV/0! | #DIV/0! | #DIV/0! |
| 98  | 5'-3' exoribonuclease 2 XRN2                                     | Q9H0D6 | 109 | 0   | 3   | 4   | 4   | #DIV/0! | #DIV/0! | #DIV/0! |
| 99  | 5'-AMP-activated protein kinase catalytic subunit alpha-1 PRKAA1 | Q13131 | 64  | 5   | 7   | 7   | 5   | 1.40    | 1.40    | 1.00    |
| 100 | 5'-AMP-activated protein kinase subunit beta-1 PRKAB1            | Q9Y478 | 30  | 0   | 2   | 3   | 3   | #DIV/0! | #DIV/0! | #DIV/0! |
| 101 | 5'-AMP-activated protein kinase subunit gamma-1 PRKAG1           | P54619 | 38  | 0   | 0   | 0   | 3   | #DIV/0! | #DIV/0! | #DIV/0! |
| 102 | 5-formyltetrahydrofolate cyclo-ligase MTHFS                      | P49914 | 23  | 0   | 2   | 4   | 0   | #DIV/0! | #DIV/0! | #DIV/0! |
| 103 | 5'-nucleotidase NT5E                                             | P21589 | 63  | 9   | 14  | 13  | 16  | 1.56    | 1.44    | 1.78    |
| 104 | 5'-nucleotidase domain-containing protein 1 NT5DC1               | Q5TFE4 | 52  | 5   | 6   | 4   | 4   | 1.20    | 0.80    | 0.80    |
| 105 | 60 kDa heat shock protein, mitochondrial HSPD1                   | P10809 | 61  | 169 | 178 | 198 | 187 | 1.05    | 1.17    | 1.11    |
| 106 | 60 kDa S5-A/Ro ribonucleoprotein TROVE2                          | P10155 | 61  | 7   | 9   | 8   | 11  | 1.29    | 1.14    | 1.57    |
| 107 | 60S acidic ribosomal protein P0 RPLP0                            | P05388 | 34  | 35  | 32  | 29  | 26  | 0.91    | 0.83    | 0.74    |
| 108 | 60S acidic ribosomal protein P1 RPLP1                            | P05386 | 12  | 3   | 0   | 0   | 3   | 0.00    | 0.00    | 1.00    |
| 109 | 60S acidic ribosomal protein P2 RPLP2                            | P05387 | 12  | 24  | 20  | 21  | 19  | 0.83    | 0.88    | 0.79    |
| 110 | 60S ribosomal protein L10 RPL10                                  | P27635 | 25  | 36  | 43  | 37  | 34  | 1.19    | 1.03    | 0.94    |
| 111 | 60S ribosomal protein L10a RPL10A                                | P62906 | 25  | 26  | 27  | 25  | 40  | 1.04    | 0.96    | 1.54    |
| 112 | 60S ribosomal protein L11 RPL11                                  | P62913 | 20  | 27  | 21  | 27  | 21  | 0.78    | 1.00    | 0.78    |
| 113 | 60S ribosomal protein L12 RPL12                                  | P30050 | 18  | 34  | 34  | 30  | 28  | 1.00    | 0.88    | 0.82    |
| 114 | 60S ribosomal protein L13 RPL13                                  | P26373 | 24  | 12  | 17  | 20  | 26  | 1.42    | 1.67    | 2.17    |
| 115 | 60S ribosomal protein L13a RPL13A                                | P40429 | 24  | 17  | 20  | 28  | 22  | 1.18    | 1.65    | 1.29    |
| 116 | 60S ribosomal protein L14 RPL14                                  | P50914 | 23  | 19  | 19  | 17  | 16  | 1.00    | 0.89    | 0.84    |
| 117 | 60S ribosomal protein L15 RPL15                                  | P61313 | 24  | 19  | 25  | 36  | 42  | 1.32    | 1.89    | 2.21    |
| 118 | 60S ribosomal protein L17 RPL17                                  | P18621 | 21  | 27  | 27  | 25  | 20  | 1.00    | 0.93    | 0.74    |
| 119 | 60S ribosomal protein L18 RPL18                                  | Q07020 | 22  | 30  | 25  | 33  | 28  | 0.83    | 1.10    | 0.93    |
| 120 | 60S ribosomal protein L18a RPL18A                                | Q02543 | 21  | 35  | 36  | 34  | 24  | 1.03    | 0.97    | 0.69    |
| 121 | 60S ribosomal protein L19 RPL19                                  | P84098 | 23  | 10  | 7   | 7   | 14  | 0.70    | 0.70    | 1.40    |
| 122 | 60S ribosomal protein L21 RPL21                                  | P46778 | 19  | 7   | 12  | 14  | 7   | 1.71    | 2.00    | 1.00    |
| 123 | 60S ribosomal protein L22 RPL22                                  | P35268 | 15  | 12  | 19  | 14  | 14  | 1.58    | 1.17    | 1.17    |
| 124 | 60S ribosomal protein L22-like 1 RPL22L1                         | Q6P5R6 | 15  | 2   | 2   | 0   | 4   | 1.00    | 0.00    | 2.00    |
| 125 | 60S ribosomal protein L23 RPL23                                  | P62829 | 15  | 41  | 38  | 42  | 44  | 0.93    | 1.02    | 1.07    |
| 126 | 60S ribosomal protein L23a RPL23A                                | P62750 | 18  | 31  | 25  | 28  | 24  | 0.81    | 0.90    | 0.77    |
| 127 | 60S ribosomal protein L24 RPL24                                  | P83731 | 18  | 25  | 27  | 27  | 27  | 1.08    | 1.08    | 1.08    |
| 128 | 60S ribosomal protein L26 RPL26                                  | P61254 | 17  | 23  | 26  | 27  | 14  | 1.13    | 1.17    | 0.61    |
| 129 | 60S ribosomal protein L27 RPL27                                  | P61353 | 16  | 21  | 21  | 22  | 23  | 1.00    | 1.05    | 1.10    |
| 130 | 60S ribosomal protein L27a RPL27A                                | P46776 | 17  | 15  | 13  | 15  | 13  | 0.87    | 1.00    | 0.87    |
| 131 | 60S ribosomal protein L28 RPL28                                  | P46779 | 16  | 19  | 17  | 14  | 15  | 0.89    | 0.74    | 0.79    |
| 132 | 60S ribosomal protein L29 RPL29                                  | P47914 | 18  | 5   | 6   | 5   | 6   | 1.20    | 1.00    | 1.20    |
| 133 | 60S ribosomal protein L3 RPL3                                    | P39023 | 46  | 33  | 38  | 37  | 47  | 1.15    | 1.12    | 1.42    |
| 134 | 60S ribosomal protein L30 RPL30                                  | P62888 | 13  | 28  | 23  | 26  | 21  | 0.82    | 0.93    | 0.75    |
| 135 | 60S ribosomal protein L31 RPL31                                  | P62899 | 14  | 14  | 12  | 13  | 8   | 0.86    | 0.93    | 0.57    |
| 136 | 60S ribosomal protein L32 RPL32                                  | P62910 | 16  | 25  | 17  | 17  | 15  | 0.68    | 0.68    | 0.60    |
| 137 | 60S ribosomal protein L34 RPL34                                  | P49207 | 13  | 16  | 7   | 12  | 13  | 0.44    | 0.75    | 0.81    |
| 138 | 60S ribosomal protein L35 RPL35                                  | P42766 | 15  | 20  | 13  | 15  | 21  | 0.65    | 0.75    | 1.05    |
| 139 | 60S ribosomal protein L35a RPL35A                                | P18077 | 13  | 7   | 0   | 0   | 5   | 0.00    | 0.00    | 0.71    |
| 140 | 60S ribosomal protein L36 RPL36                                  | Q9Y3U8 | 12  | 18  | 14  | 13  | 12  | 0.78    | 0.72    | 0.67    |
| 141 | 60S ribosomal protein L36a RPL36A                                | P83881 | 12  | 4   | 3   | 9   | 0   | 0.75    | 2.25    | 0.00    |
| 142 | 60S ribosomal protein L36a-like RPL36AL                          | Q969Q0 | 12  | 2   | 3   | 10  | 6   | 1.50    | 5.00    | 3.00    |
| 143 | 60S ribosomal protein L37a RPL37A                                | P61513 | 10  | 24  | 17  | 17  | 18  | 0.71    | 0.71    | 0.75    |
| 144 | 60S ribosomal protein L38 RPL38                                  | P63173 | 8   | 29  | 31  | 30  | 19  | 1.07    | 1.03    | 0.66    |
| 145 | 60S ribosomal protein L4 RPL4                                    | P36578 | 48  | 15  | 16  | 20  | 31  | 1.07    | 1.33    | 2.07    |
| 146 | 60S ribosomal protein L5 RPL5                                    | P46777 | 34  | 28  | 16  | 30  | 22  | 0.57    | 1.07    | 0.79    |
| 147 | 60S ribosomal protein L6 RPL6                                    | Q02878 | 33  | 13  | 21  | 19  | 15  | 1.62    | 1.46    | 1.15    |
| 148 | 60S ribosomal protein L7 RPL7                                    | P18124 | 29  | 28  | 31  | 30  | 40  | 1.11    | 1.07    | 1.43    |
| 149 | 60S ribosomal protein L7a RPL7A                                  | P62424 | 30  | 42  | 35  | 55  | 62  | 0.83    | 1.31    | 1.48    |
| 150 | 60S ribosomal protein L8 RPL8                                    | P62917 | 28  | 14  | 12  | 20  | 24  | 0.86    | 1.43    | 1.71    |
| 151 | 60S ribosomal protein L9 RPL9                                    | P32969 | 22  | 30  | 31  | 29  | 31  | 1.03    | 0.97    | 1.03    |
| 152 | 60S ribosome subunit biogenesis protein NIP7 homolog NIP7        | Q9Y221 | 20  | 2   | 2   | 3   | 0   | 1.00    | 1.50    | 0.00    |
| 153 | 6-phosphogluconate dehydrogenase, decarboxylating PGD            | P52209 | 53  | 54  | 50  | 56  | 64  | 0.93    | 1.04    | 1.19    |
| 154 | 6-phosphogluconolactonase PGLS                                   | O95336 | 28  | 15  | 18  | 19  | 25  | 1.20    | 1.27    | 1.67    |
| 155 | 7,8-dihydro-8-oxoguanine triphosphatase NUDT1                    | P36639 | 23  | 5   | 0   | 0   | 0   | 0.00    | 0.00    | 0.00    |
| 156 | 78 kDa glucose-regulated protein HSPA5                           | P11021 | 72  | 237 | 193 | 191 | 189 | 0.81    | 0.81    | 0.80    |
| 157 | 7-dehydrocholesterol reductase DHCR7                             | Q9UBM7 | 54  | 0   | 0   | 2   | 2   | #DIV/0! | #DIV/0! | #DIV/0! |
| 158 | Absent in melanoma 1 protein AIM1                                | Q9Y4K1 | 189 | 4   | 3   | 5   | 4   | 0.75    | 1.25    | 1.00    |
| 159 | Acetyl-CoA acetyltransferase, cytosolic ACAT2                    | Q9BWD1 | 41  | 52  | 44  | 50  | 46  | 0.85    | 0.96    | 0.88    |
| 160 | Acetyl-CoA acetyltransferase, mitochondrial ACAT1                | P24752 | 45  | 2   | 7   | 2   | 7   | 3.50    | 1.00    | 3.50    |
| 161 | Acetyl-CoA carboxylase 1 ACACA                                   | Q13085 | 266 | 32  | 34  | 41  | 42  | 1.06    | 1.28    | 1.31    |

|     |                                                                              |        |     |     |      |     |     |         |         |         |
|-----|------------------------------------------------------------------------------|--------|-----|-----|------|-----|-----|---------|---------|---------|
| 162 | Acid ceramidase ASAH1                                                        | Q13510 | 45  | 16  | 16   | 10  | 11  | 1.00    | 0.63    | 0.69    |
| 163 | Acidic leucine-rich nuclear phosphoprotein 32 family member A ANP32A         | P39687 | 29  | 12  | 16   | 9   | 0   | 1.33    | 0.75    | 0.00    |
| 164 | Acidic leucine-rich nuclear phosphoprotein 32 family member B ANP32B         | Q92688 | 29  | 24  | 20   | 20  | 27  | 0.83    | 0.83    | 1.13    |
| 165 | Acidic leucine-rich nuclear phosphoprotein 32 family member E ANP32E         | Q9BTT0 | 31  | 0   | 4    | 2   | 0   | #DIV/0! | #DIV/0! | #DIV/0! |
| 166 | Aconitate hydratase, mitochondrial ACO2                                      | Q99798 | 85  | 34  | 27   | 25  | 24  | 0.79    | 0.74    | 0.71    |
| 167 | Actin filament-associated protein 1-like 2 AFAP1L2                           | Q8N4X5 | 91  | 0   | 0    | 3   | 0   | #DIV/0! | #DIV/0! | #DIV/0! |
| 168 | Actin, alpha skeletal muscle ACTA1                                           | P68133 | 42  | 0   | 150  | 126 | 135 | #DIV/0! | #DIV/0! | #DIV/0! |
| 169 | Actin, cytoplasmic 2 ACTG1                                                   | P63261 | 42  | 930 | 1035 | 963 | 950 | 1.11    | 1.04    | 1.02    |
| 170 | Actin-related protein 10 ACTR10                                              | Q9NZ32 | 46  | 0   | 6    | 2   | 5   | #DIV/0! | #DIV/0! | #DIV/0! |
| 171 | Actin-related protein 2 ACTR2                                                | P61160 | 45  | 32  | 32   | 34  | 26  | 1.00    | 1.06    | 0.81    |
| 172 | Actin-related protein 2/3 complex subunit 1A ARPC1A                          | Q92747 | 42  | 6   | 6    | 2   | 3   | 1.00    | 0.33    | 0.50    |
| 173 | Actin-related protein 2/3 complex subunit 1B ARPC1B                          | O15143 | 41  | 38  | 44   | 42  | 41  | 1.16    | 1.11    | 1.08    |
| 174 | Actin-related protein 2/3 complex subunit 2 ARPC2                            | O15144 | 34  | 45  | 62   | 44  | 40  | 1.38    | 0.98    | 0.89    |
| 175 | Actin-related protein 2/3 complex subunit 3 ARPC3                            | O15145 | 21  | 29  | 21   | 24  | 22  | 0.72    | 0.83    | 0.76    |
| 176 | Actin-related protein 2/3 complex subunit 4 ARPC4                            | P59998 | 20  | 57  | 48   | 49  | 55  | 0.84    | 0.86    | 0.96    |
| 177 | Actin-related protein 2/3 complex subunit 5 ARPC5                            | O15511 | 16  | 9   | 13   | 9   | 10  | 1.44    | 1.00    | 1.11    |
| 178 | Actin-related protein 2/3 complex subunit 5-like protein ARPC5L              | Q9BPX5 | 17  | 8   | 14   | 14  | 12  | 1.75    | 1.75    | 1.50    |
| 179 | Actin-related protein 3 ACTR3                                                | P61158 | 47  | 69  | 67   | 56  | 47  | 0.97    | 0.81    | 0.68    |
| 180 | Activated RNA polymerase II transcriptional coactivator p15 SUB1             | P53999 | 14  | 22  | 15   | 15  | 9   | 0.68    | 0.68    | 0.41    |
| 181 | Activating signal cointegrator 1 complex subunit 2 ASCC2                     | Q9H1I8 | 86  | 2   | 2    | 2   | 3   | 1.00    | 1.00    | 1.50    |
| 182 | Activating signal cointegrator 1 complex subunit 3 ASCC3                     | Q8N3C0 | 251 | 7   | 4    | 0   | 4   | 0.57    | 0.00    | 0.57    |
| 183 | Activator of 90 kDa heat shock protein ATPase homolog 1 AHSA1                | O95433 | 38  | 15  | 19   | 17  | 14  | 1.27    | 1.13    | 0.93    |
| 184 | Acyl carrier protein, mitochondrial NDUFB1                                   | O14561 | 17  | 3   | 2    | 6   | 3   | 0.67    | 2.00    | 1.00    |
| 185 | Acylamino-acid-releasing enzyme APEH                                         | P13798 | 81  | 7   | 2    | 6   | 10  | 0.29    | 0.86    | 1.43    |
| 186 | Acyl-CoA dehydrogenase family member 9, mitochondrial ACAD9                  | Q9H845 | 69  | 5   | 4    | 0   | 0   | 0.80    | 0.00    | 0.00    |
| 187 | Acyl-CoA-binding protein DBI                                                 | P07108 | 10  | 10  | 5    | 7   | 4   | 0.50    | 0.70    | 0.40    |
| 188 | Acyl-coenzyme A thioesterase 13 ACOT13                                       | Q9NPJ3 | 15  | 0   | 2    | 4   | 5   | #DIV/0! | #DIV/0! | #DIV/0! |
| 189 | Acyl-coenzyme A thioesterase 9, mitochondrial ACOT9                          | Q9Y305 | 50  | 12  | 5    | 6   | 6   | 0.42    | 0.50    | 0.50    |
| 190 | Acylphosphatase-1 ACYP1                                                      | P07311 | 11  | 2   | 0    | 0   | 0   | 0.00    | 0.00    | 0.00    |
| 191 | Acyl-protein thioesterase 1 LYPLA1                                           | O75608 | 25  | 19  | 18   | 18  | 14  | 0.95    | 0.95    | 0.74    |
| 192 | Acyl-protein thioesterase 2 LYPLA2                                           | O95372 | 25  | 12  | 13   | 14  | 8   | 1.08    | 1.17    | 0.67    |
| 193 | Acylpyruvase FAHD1, mitochondrial FAHD1                                      | Q6P587 | 25  | 3   | 5    | 6   | 3   | 1.67    | 2.00    | 1.00    |
| 194 | Adapter molecule crk CRK                                                     | P46108 | 34  | 8   | 8    | 14  | 15  | 1.00    | 1.75    | 1.88    |
| 195 | Adaptin ear-binding coat-associated protein 2 NECAP2                         | Q9NVZ3 | 28  | 3   | 0    | 0   | 0   | 0.00    | 0.00    | 0.00    |
| 196 | Adenine phosphoribosyltransferase APRT                                       | P07741 | 20  | 40  | 35   | 41  | 34  | 0.88    | 1.03    | 0.85    |
| 197 | Adenosine kinase ADK                                                         | P55263 | 41  | 9   | 9    | 11  | 13  | 1.00    | 1.22    | 1.44    |
| 198 | Adenosylhomocysteinase AHCY                                                  | P23526 | 48  | 65  | 71   | 78  | 74  | 1.09    | 1.20    | 1.14    |
| 199 | Adenylate kinase 2, mitochondrial AK2                                        | P54819 | 26  | 18  | 23   | 25  | 25  | 1.28    | 1.39    | 1.39    |
| 200 | Adenylate kinase 4, mitochondrial AK4                                        | P27144 | 25  | 20  | 21   | 20  | 17  | 1.05    | 1.00    | 0.85    |
| 201 | Adenylate kinase isoenzyme 1 AK1                                             | P00568 | 22  | 23  | 18   | 17  | 18  | 0.78    | 0.74    | 0.78    |
| 202 | Adenylosuccinate lyase ADSL                                                  | P30566 | 55  | 0   | 7    | 5   | 7   | #DIV/0! | #DIV/0! | #DIV/0! |
| 203 | Adenylosuccinate synthetase isozyme 2 ADSS                                   | P30520 | 50  | 0   | 5    | 8   | 0   | #DIV/0! | #DIV/0! | #DIV/0! |
| 204 | Adenylyl cyclase-associated protein 1 CAP1                                   | Q01518 | 52  | 155 | 138  | 160 | 159 | 0.89    | 1.03    | 1.03    |
| 205 | Adipocyte plasma membrane-associated protein APMAP                           | Q9HDC9 | 46  | 26  | 20   | 24  | 22  | 0.77    | 0.92    | 0.85    |
| 206 | ADP/ATP translocase 2 SLC25A5                                                | P05141 | 33  | 31  | 35   | 33  | 45  | 1.13    | 1.06    | 1.45    |
| 207 | ADP/ATP translocase 3 SLC25A6                                                | P12236 | 33  | 0   | 0    | 8   | 10  | #DIV/0! | #DIV/0! | #DIV/0! |
| 208 | ADP-ribosylation factor 1 ARF1                                               | P84077 | 21  | 87  | 78   | 72  | 95  | 0.90    | 0.83    | 1.09    |
| 209 | ADP-ribosylation factor 4 ARF4                                               | P18085 | 21  | 69  | 64   | 58  | 60  | 0.93    | 0.84    | 0.87    |
| 210 | ADP-ribosylation factor 5 ARF5                                               | P84085 | 21  | 56  | 28   | 44  | 56  | 0.50    | 0.79    | 1.00    |
| 211 | ADP-ribosylation factor 6 ARF6                                               | P62330 | 20  | 14  | 11   | 8   | 5   | 0.79    | 0.57    | 0.36    |
| 212 | ADP-ribosylation factor GTPase-activating protein 1 ARFGAP1                  | Q8N6T3 | 45  | 0   | 0    | 0   | 2   | #DIV/0! | #DIV/0! | #DIV/0! |
| 213 | ADP-ribosylation factor-like protein 1 ARL1                                  | P40616 | 20  | 15  | 17   | 17  | 16  | 1.13    | 1.13    | 1.07    |
| 214 | ADP-ribosylation factor-like protein 2 ARL2                                  | P36404 | 21  | 8   | 2    | 2   | 0   | 0.25    | 0.25    | 0.00    |
| 215 | ADP-ribosylation factor-like protein 3 ARL3                                  | P36405 | 20  | 11  | 8    | 6   | 6   | 0.73    | 0.55    | 0.55    |
| 216 | ADP-ribosylation factor-like protein 6-interacting protein 1 ARL6IP1         | Q15041 | 23  | 3   | 4    | 3   | 0   | 1.33    | 1.00    | 0.00    |
| 217 | ADP-ribosylation factor-like protein 8A ARL8A                                | Q96BM9 | 21  | 22  | 20   | 21  | 20  | 0.91    | 0.95    | 0.91    |
| 218 | ADP-ribosylation factor-like protein 8B ARL8B                                | Q9NVJ2 | 22  | 28  | 27   | 29  | 34  | 0.96    | 1.04    | 1.21    |
| 219 | ADP-ribosylation factor-related protein 1 ARFRP1                             | Q13795 | 23  | 0   | 3    | 4   | 3   | #DIV/0! | #DIV/0! | #DIV/0! |
| 220 | ADP-sugar pyrophosphatase NUDT5                                              | Q9UJK9 | 24  | 11  | 11   | 15  | 13  | 1.00    | 1.36    | 1.18    |
| 221 | Afadin MLLT4                                                                 | P55196 | 207 | 2   | 3    | 5   | 5   | 1.50    | 2.50    | 2.50    |
| 222 | Aflatoxin B1 aldehyde reductase member 2 AKR7A2                              | O43488 | 40  | 3   | 5    | 7   | 5   | 1.67    | 2.33    | 1.67    |
| 223 | Agurin AGRN                                                                  | O00468 | 217 | 0   | 3    | 0   | 0   | #DIV/0! | #DIV/0! | #DIV/0! |
| 224 | A-kinase anchor protein 12 AKAP12                                            | Q02952 | 191 | 0   | 0    | 6   | 2   | #DIV/0! | #DIV/0! | #DIV/0! |
| 225 | A-kinase anchor protein 2 AKAP2                                              | Q9Y2D5 | 95  | 0   | 5    | 4   | 3   | #DIV/0! | #DIV/0! | #DIV/0! |
| 226 | Alanine--tRNA ligase, cytoplasmic AARS                                       | P49588 | 107 | 54  | 52   | 39  | 41  | 0.96    | 0.72    | 0.76    |
| 227 | Alcohol dehydrogenase [NADP(+)] AKR1A1                                       | P14550 | 37  | 31  | 32   | 33  | 26  | 1.03    | 1.06    | 0.84    |
| 228 | Alcohol dehydrogenase class-3 ADH5                                           | P11766 | 40  | 18  | 17   | 21  | 15  | 0.94    | 1.17    | 0.83    |
| 229 | Aldehyde dehydrogenase family 1 member A3 ALDH1A3                            | P47895 | 56  | 58  | 32   | 34  | 35  | 0.55    | 0.59    | 0.60    |
| 230 | Aldehyde dehydrogenase X, mitochondrial ALDH1B1                              | P30837 | 57  | 0   | 0    | 5   | 6   | #DIV/0! | #DIV/0! | #DIV/0! |
| 231 | Aldehyde dehydrogenase, dimeric NADP-preferring ALDH3A1                      | P30838 | 50  | 9   | 10   | 12  | 14  | 1.11    | 1.33    | 1.56    |
| 232 | Aldehyde dehydrogenase, mitochondrial ALDH2                                  | P05091 | 56  | 24  | 22   | 20  | 23  | 0.92    | 0.83    | 0.96    |
| 233 | Aldo-keto reductase family 1 member B10 AKR1B10                              | O60218 | 36  | 15  | 19   | 15  | 16  | 1.27    | 1.00    | 1.07    |
| 234 | Aldo-keto reductase family 1 member C1 AKR1C1                                | Q04828 | 37  | 72  | 63   | 52  | 59  | 0.88    | 0.72    | 0.82    |
| 235 | Aldo-keto reductase family 1 member C2 AKR1C2                                | P52895 | 37  | 63  | 41   | 43  | 43  | 0.65    | 0.68    | 0.68    |
| 236 | Aldo-keto reductase family 1 member C3 AKR1C3                                | P42330 | 37  | 51  | 39   | 35  | 45  | 0.76    | 0.69    | 0.88    |
| 237 | Aldose reductase AKR1B1                                                      | P15121 | 36  | 32  | 31   | 30  | 25  | 0.97    | 0.94    | 0.78    |
| 238 | Alkylidihydroxyacetonephosphate synthase, peroxisomal AGPS                   | O00116 | 73  | 2   | 4    | 12  | 12  | 2.00    | 6.00    | 6.00    |
| 239 | All-trans-retinol 13,14-reductase RETSAT                                     | Q6NUM9 | 67  | 4   | 5    | 4   | 2   | 1.25    | 1.00    | 0.50    |
| 240 | Alpha/beta hydrolase domain-containing protein 11 ABHD11                     | Q8NFV4 | 35  | 0   | 0    | 0   | 2   | #DIV/0! | #DIV/0! | #DIV/0! |
| 241 | Alpha/beta hydrolase domain-containing protein 14B ABHD14B                   | Q96IU4 | 22  | 14  | 5    | 5   | 4   | 0.36    | 0.36    | 0.29    |
| 242 | Alpha-1,3-mannosyl-glycoprotein 2-beta-N-acetylglucosaminyltransferase MGAT1 | P26572 | 51  | 2   | 0    | 0   | 0   | 0.00    | 0.00    | 0.00    |
| 243 | Alpha-2-macroglobulin-like protein 1 A2ML1                                   | A8K2U0 | 161 | 0   | 0    | 5   | 3   | #DIV/0! | #DIV/0! | #DIV/0! |

|     |                                                                             |        |     |     |     |     |     |         |         |         |
|-----|-----------------------------------------------------------------------------|--------|-----|-----|-----|-----|-----|---------|---------|---------|
| 244 | Alpha-actinin-1 ACTN1                                                       | P12814 | 103 | 430 | 360 | 384 | 341 | 0.84    | 0.89    | 0.79    |
| 245 | Alpha-actinin-4 ACTN4                                                       | O43707 | 105 | 382 | 333 | 298 | 281 | 0.87    | 0.78    | 0.74    |
| 246 | Alpha-adducin ADD1                                                          | P35611 | 81  | 0   | 2   | 0   | 2   | #DIV/0! | #DIV/0! | #DIV/0! |
| 247 | Alpha-aminoacidic semialdehyde dehydrogenase ALDH7A1                        | P49419 | 58  | 18  | 21  | 20  | 19  | 1.17    | 1.11    | 1.06    |
| 248 | Alpha-centractin ACTR1A                                                     | P61163 | 43  | 31  | 28  | 25  | 22  | 0.90    | 0.81    | 0.71    |
| 249 | Alpha-crystallin B chain CRYAB                                              | P02511 | 20  | 11  | 6   | 6   | 5   | 0.55    | 0.55    | 0.45    |
| 250 | Alpha-enolase ENO1                                                          | P06733 | 47  | 430 | 471 | 520 | 475 | 1.10    | 1.21    | 1.10    |
| 251 | Alpha-mannosidase 2 MAN2A1                                                  | Q16706 | 131 | 4   | 0   | 0   | 5   | 0.00    | 0.00    | 1.25    |
| 252 | Alpha-parvin PARVA                                                          | Q9NVD7 | 42  | 2   | 5   | 5   | 8   | 2.50    | 2.50    | 4.00    |
| 253 | Alpha-soluble NSF attachment protein NAPA                                   | P54920 | 33  | 18  | 16  | 12  | 11  | 0.89    | 0.67    | 0.61    |
| 254 | Alpha-synuclein SNCA                                                        | P37840 | 14  | 6   | 0   | 6   | 4   | 0.00    | 1.00    | 0.67    |
| 255 | Aminoacyl tRNA synthase complex-interacting multifunctional protein 1 AIMP1 | Q12904 | 34  | 12  | 8   | 19  | 15  | 0.67    | 1.58    | 1.25    |
| 256 | Aminoacyl tRNA synthase complex-interacting multifunctional protein 2 AIMP2 | Q13155 | 35  | 17  | 11  | 11  | 7   | 0.65    | 0.65    | 0.41    |
| 257 | Aminoacylase-1 ACY1                                                         | Q03154 | 46  | 0   | 5   | 9   | 8   | #DIV/0! | #DIV/0! | #DIV/0! |
| 258 | Aminopeptidase B RNPEP                                                      | Q9H4A4 | 73  | 30  | 31  | 33  | 37  | 1.03    | 1.10    | 1.23    |
| 259 | Amyloid beta A4 protein APP                                                 | P05067 | 87  | 8   | 8   | 8   | 6   | 1.00    | 1.00    | 0.75    |
| 260 | Anamorsin CIAPIN1                                                           | Q6F181 | 34  | 8   | 5   | 9   | 10  | 0.63    | 1.13    | 1.25    |
| 261 | Ankycorbin RAI14                                                            | Q9P0K7 | 110 | 0   | 0   | 2   | 0   | #DIV/0! | #DIV/0! | #DIV/0! |
| 262 | Ankyrin repeat domain-containing protein SOWAHC SOWAHC                      | Q53LP3 | 56  | 2   | 0   | 0   | 2   | 0.00    | 0.00    | 1.00    |
| 263 | Annexin A1 ANXA1                                                            | P04083 | 39  | 241 | 272 | 286 | 243 | 1.13    | 1.19    | 1.01    |
| 264 | Annexin A11 ANXA11                                                          | P50995 | 54  | 23  | 20  | 26  | 24  | 0.87    | 1.13    | 1.04    |
| 265 | Annexin A2 ANXA2                                                            | P07355 | 39  | 446 | 497 | 551 | 476 | 1.11    | 1.24    | 1.07    |
| 266 | Annexin A3 ANXA3                                                            | P12429 | 36  | 97  | 82  | 87  | 78  | 0.85    | 0.90    | 0.80    |
| 267 | Annexin A4 ANXA4                                                            | P09525 | 36  | 44  | 35  | 34  | 33  | 0.80    | 0.77    | 0.75    |
| 268 | Annexin A5 ANXA5                                                            | P08758 | 36  | 87  | 84  | 89  | 93  | 0.97    | 1.02    | 1.07    |
| 269 | Annexin A6 ANXA6                                                            | P08133 | 76  | 6   | 12  | 28  | 27  | 2.00    | 4.67    | 4.50    |
| 270 | Annexin A7 ANXA7                                                            | P20073 | 53  | 10  | 13  | 12  | 9   | 1.30    | 1.20    | 0.90    |
| 271 | Annexin A8 ANXA8                                                            | P13928 | 37  | 72  | 69  | 77  | 52  | 0.96    | 1.07    | 0.72    |
| 272 | Anterior gradient protein 2 homolog AGR2                                    | O95994 | 20  | 27  | 19  | 17  | 24  | 0.70    | 0.63    | 0.89    |
| 273 | AP-1 complex subunit beta-1 AP1B1                                           | Q10567 | 105 | 62  | 50  | 47  | 47  | 0.81    | 0.76    | 0.76    |
| 274 | AP-1 complex subunit gamma-1 AP1G1                                          | O43747 | 91  | 22  | 19  | 17  | 24  | 0.86    | 0.77    | 1.09    |
| 275 | AP-1 complex subunit gamma-like 2 AP1G2                                     | O75843 | 87  | 4   | 0   | 0   | 3   | 0.00    | 0.00    | 0.75    |
| 276 | AP-1 complex subunit mu-1 AP1M1                                             | Q9BXS5 | 49  | 2   | 4   | 5   | 7   | 2.00    | 2.50    | 3.50    |
| 277 | AP-1 complex subunit mu-2 AP1M2                                             | Q9V6Q5 | 48  | 0   | 0   | 5   | 0   | #DIV/0! | #DIV/0! | #DIV/0! |
| 278 | AP-1 complex subunit sigma-1A AP1S1                                         | P61966 | 19  | 5   | 3   | 3   | 0   | 0.60    | 0.60    | 0.00    |
| 279 | AP-2 complex subunit alpha-1 AP2A1                                          | O95782 | 108 | 32  | 28  | 26  | 16  | 0.88    | 0.81    | 0.50    |
| 280 | AP-2 complex subunit alpha-2 AP2A2                                          | O94973 | 104 | 8   | 17  | 17  | 15  | 2.13    | 2.13    | 1.88    |
| 281 | AP-2 complex subunit beta AP2B1                                             | P63010 | 105 | 58  | 46  | 47  | 51  | 0.79    | 0.81    | 0.88    |
| 282 | AP-2 complex subunit mu AP2M1                                               | Q96CW1 | 50  | 2   | 6   | 5   | 0   | 3.00    | 2.50    | 0.00    |
| 283 | AP-2 complex subunit sigma AP2S1                                            | P53680 | 17  | 18  | 9   | 13  | 15  | 0.50    | 0.72    | 0.83    |
| 284 | AP-3 complex subunit beta-1 AP3B1                                           | O00203 | 121 | 21  | 26  | 28  | 26  | 1.24    | 1.33    | 1.24    |
| 285 | AP-3 complex subunit delta-1 AP3D1                                          | O14617 | 130 | 12  | 13  | 17  | 11  | 1.08    | 1.42    | 0.92    |
| 286 | AP-3 complex subunit sigma-1 AP3S1                                          | Q92572 | 22  | 11  | 5   | 8   | 3   | 0.45    | 0.73    | 0.27    |
| 287 | Apoptosis inhibitor 5 API5                                                  | Q98Z25 | 59  | 2   | 2   | 2   | 0   | 1.00    | 1.00    | 0.00    |
| 288 | Apoptosis regulator BAX BAX                                                 | Q07812 | 21  | 17  | 12  | 11  | 14  | 0.71    | 0.65    | 0.82    |
| 289 | Apoptosis-associated speck-like protein containing a CARD PYCARD            | Q9ULZ3 | 22  | 18  | 8   | 11  | 9   | 0.44    | 0.61    | 0.50    |
| 290 | Apoptosis-inducing factor 1, mitochondrial AIFM1                            | O95831 | 67  | 3   | 7   | 2   | 5   | 2.33    | 0.67    | 1.67    |
| 291 | Arachidonate 15-lipoxygenase B ALOX15B                                      | O15296 | 76  | 0   | 0   | 2   | 0   | #DIV/0! | #DIV/0! | #DIV/0! |
| 292 | Arfaptin-1 ARFIP1                                                           | P53367 | 42  | 0   | 3   | 0   | 0   | #DIV/0! | #DIV/0! | #DIV/0! |
| 293 | Arginase-1 ARG1                                                             | P05089 | 35  | 0   | 5   | 0   | 0   | #DIV/0! | #DIV/0! | #DIV/0! |
| 294 | Arginine--tRNA ligase, cytoplasmic RARS                                     | P54136 | 75  | 63  | 59  | 61  | 62  | 0.94    | 0.97    | 0.98    |
| 295 | Argininosuccinate lyase ASL                                                 | P04424 | 52  | 0   | 4   | 3   | 3   | #DIV/0! | #DIV/0! | #DIV/0! |
| 296 | Argininosuccinate synthase ASS1                                             | P00966 | 47  | 0   | 3   | 0   | 3   | #DIV/0! | #DIV/0! | #DIV/0! |
| 297 | Arylsulfatase A ARSA                                                        | P15289 | 54  | 0   | 3   | 3   | 4   | #DIV/0! | #DIV/0! | #DIV/0! |
| 298 | Asparagine synthetase [glutamine-hydrolyzing] ASNS                          | P08243 | 64  | 9   | 9   | 5   | 3   | 1.00    | 0.56    | 0.33    |
| 299 | Asparagine--tRNA ligase, cytoplasmic NARS                                   | O43776 | 63  | 29  | 30  | 44  | 39  | 1.03    | 1.52    | 1.34    |
| 300 | Aspartate aminotransferase, cytoplasmic GOT1                                | P17174 | 46  | 23  | 30  | 23  | 27  | 1.30    | 1.00    | 1.17    |
| 301 | Aspartate aminotransferase, mitochondrial GOT2                              | P00505 | 48  | 50  | 46  | 39  | 46  | 0.92    | 0.78    | 0.92    |
| 302 | Aspartate--tRNA ligase, cytoplasmic DARS                                    | P14868 | 57  | 44  | 37  | 43  | 40  | 0.84    | 0.98    | 0.91    |
| 303 | Aspartyl aminopeptidase DNPEP                                               | Q9ULA0 | 52  | 3   | 3   | 2   | 0   | 1.00    | 0.67    | 0.00    |
| 304 | Astrocytic phosphoprotein PEA-15 PEA15                                      | Q15121 | 15  | 15  | 15  | 10  | 11  | 1.00    | 0.67    | 0.73    |
| 305 | Ataxin-10 ATXN10                                                            | Q9UBB4 | 53  | 6   | 5   | 9   | 7   | 0.83    | 1.50    | 1.17    |
| 306 | Atlastin-3 ATL3                                                             | Q6DD88 | 61  | 30  | 25  | 25  | 28  | 0.83    | 0.83    | 0.93    |
| 307 | ATP synthase F(0) complex subunit B1, mitochondrial ATP5F1                  | P24539 | 29  | 23  | 29  | 23  | 18  | 1.26    | 1.00    | 0.78    |
| 308 | ATP synthase protein 8 MT-ATP8                                              | P03928 | 8   | 7   | 4   | 5   | 0   | 0.57    | 0.71    | 0.00    |
| 309 | ATP synthase subunit alpha, mitochondrial ATP5A1                            | P25705 | 60  | 69  | 41  | 42  | 42  | 0.59    | 0.61    | 0.61    |
| 310 | ATP synthase subunit beta, mitochondrial ATP5B                              | P06576 | 57  | 78  | 63  | 59  | 68  | 0.81    | 0.76    | 0.87    |
| 311 | ATP synthase subunit d, mitochondrial ATP5H                                 | O75947 | 18  | 15  | 7   | 6   | 5   | 0.47    | 0.40    | 0.33    |
| 312 | ATP synthase subunit e, mitochondrial ATP5I                                 | P56385 | 8   | 15  | 10  | 12  | 11  | 0.67    | 0.80    | 0.73    |
| 313 | ATP synthase subunit epsilon, mitochondrial ATP5E                           | P56381 | 6   | 5   | 0   | 5   | 0   | 0.00    | 1.00    | 0.00    |
| 314 | ATP synthase subunit f, mitochondrial ATP5J2                                | P56134 | 11  | 16  | 15  | 14  | 19  | 0.94    | 0.88    | 1.19    |
| 315 | ATP synthase subunit g, mitochondrial ATP5L                                 | O75964 | 11  | 15  | 17  | 14  | 10  | 1.13    | 0.93    | 0.67    |
| 316 | ATP synthase subunit gamma, mitochondrial ATP5C1                            | P36542 | 33  | 18  | 9   | 17  | 19  | 0.50    | 0.94    | 1.06    |
| 317 | ATP synthase subunit O, mitochondrial ATP5O                                 | P48047 | 23  | 22  | 19  | 21  | 15  | 0.86    | 0.95    | 0.68    |
| 318 | ATPase ASNA1 ASNA1                                                          | O43681 | 39  | 8   | 8   | 8   | 4   | 1.00    | 1.00    | 0.50    |
| 319 | ATPase inhibitor, mitochondrial ATPIF1                                      | Q9UII2 | 12  | 5   | 5   | 3   | 0   | 1.00    | 0.60    | 0.00    |
| 320 | ATP-binding cassette sub-family E member 1 ABCE1                            | P61221 | 67  | 15  | 15  | 12  | 14  | 1.00    | 0.80    | 0.93    |
| 321 | ATP-binding cassette sub-family F member 1 ABCF1                            | Q8NE71 | 96  | 4   | 0   | 6   | 4   | 0.00    | 1.50    | 1.00    |
| 322 | ATP-binding cassette sub-family F member 3 ABCF3                            | Q9NUQ8 | 80  | 0   | 2   | 2   | 0   | #DIV/0! | #DIV/0! | #DIV/0! |
| 323 | ATP-citrate synthase ACLY                                                   | P53396 | 121 | 168 | 167 | 183 | 159 | 0.99    | 1.09    | 0.95    |
| 324 | ATP-dependent 6-phosphofructokinase, liver type PFKL                        | P17858 | 85  | 20  | 16  | 25  | 20  | 0.80    | 1.25    | 1.00    |
| 325 | ATP-dependent 6-phosphofructokinase, muscle type PFKM                       | P08237 | 85  | 4   | 0   | 0   | 0   | 0.00    | 0.00    | 0.00    |

|     |                                                                                    |        |     |     |    |     |     |         |         |         |
|-----|------------------------------------------------------------------------------------|--------|-----|-----|----|-----|-----|---------|---------|---------|
| 326 | ATP-dependent 6-phosphofructokinase, platelet type PFKP                            | Q01813 | 86  | 82  | 79 | 113 | 102 | 0.96    | 1.38    | 1.24    |
| 327 | ATP-dependent Clp protease proteolytic subunit, mitochondrial CLPP                 | Q16740 | 30  | 3   | 3  | 5   | 0   | 1.00    | 1.67    | 0.00    |
| 328 | ATP-dependent RNA helicase A DHX9                                                  | Q08211 | 141 | 27  | 39 | 42  | 51  | 1.44    | 1.56    | 1.89    |
| 329 | ATP-dependent RNA helicase DDX1 DDX1                                               | Q92499 | 82  | 23  | 16 | 23  | 17  | 0.70    | 1.00    | 0.74    |
| 330 | ATP-dependent RNA helicase DDX19A DDX19A                                           | Q9NUU7 | 54  | 3   | 6  | 5   | 6   | 2.00    | 1.67    | 2.00    |
| 331 | ATP-dependent RNA helicase DDX39A DDX39A                                           | O00148 | 49  | 0   | 0  | 20  | 21  | #DIV/0! | #DIV/0! | #DIV/0! |
| 332 | ATP-dependent RNA helicase DDX3X DDX3X                                             | O00571 | 73  | 38  | 28 | 41  | 44  | 0.74    | 1.08    | 1.16    |
| 333 | Autophagy-related protein 16-1 ATG16L1                                             | Q676U5 | 68  | 0   | 0  | 0   | 2   | #DIV/0! | #DIV/0! | #DIV/0! |
| 334 | Baculoviral IAP repeat-containing protein 6 BIRC6                                  | Q9NR09 | 530 | 6   | 5  | 3   | 9   | 0.83    | 0.50    | 1.50    |
| 335 | BAG family molecular chaperone regulator 3 BAG3                                    | O95817 | 62  | 0   | 5  | 9   | 10  | #DIV/0! | #DIV/0! | #DIV/0! |
| 336 | Barrier-to-autointegration factor BANF1                                            | O75531 | 10  | 0   | 0  | 0   | 2   | #DIV/0! | #DIV/0! | #DIV/0! |
| 337 | Basement membrane-specific heparan sulfate proteoglycan core protein HSPG2         | P98160 | 469 | 0   | 2  | 0   | 0   | #DIV/0! | #DIV/0! | #DIV/0! |
| 338 | Basic leucine zipper and W2 domain-containing protein 1 BZW1                       | Q7L1Q6 | 48  | 26  | 27 | 23  | 31  | 1.04    | 0.88    | 1.19    |
| 339 | Basic leucine zipper and W2 domain-containing protein 2 BZW2                       | Q9Y6E2 | 48  | 3   | 4  | 4   | 0   | 1.33    | 1.33    | 0.00    |
| 340 | Basigin BSG                                                                        | P35613 | 42  | 6   | 5  | 5   | 10  | 0.83    | 0.83    | 1.67    |
| 341 | B-cell receptor-associated protein 31 BCAP31                                       | P51572 | 28  | 21  | 20 | 19  | 24  | 0.95    | 0.90    | 1.14    |
| 342 | Bcl-2-associated transcription factor 1 BCLAF1                                     | Q9NVF8 | 106 | 2   | 0  | 5   | 3   | 0.00    | 2.50    | 1.50    |
| 343 | Bcl-2-like protein 13 BCL2L13                                                      | Q9BXX5 | 53  | 0   | 5  | 4   | 7   | #DIV/0! | #DIV/0! | #DIV/0! |
| 344 | BET1 homolog BET1                                                                  | O15155 | 13  | 7   | 0  | 3   | 0   | 0.00    | 0.43    | 0.00    |
| 345 | BET1-like protein BET1L                                                            | Q9NYM9 | 12  | 2   | 0  | 3   | 0   | 0.00    | 1.50    | 0.00    |
| 346 | Beta-1,4-galactosyltransferase 1 B4GALT1                                           | P15291 | 44  | 6   | 4  | 4   | 4   | 0.67    | 0.67    | 0.67    |
| 347 | Beta-2-microglobulin B2M                                                           | P61769 | 14  | 6   | 10 | 8   | 4   | 1.67    | 1.33    | 0.67    |
| 348 | Beta-actin-like protein 2 ACTBL2                                                   | Q562R1 | 42  | 56  | 76 | 69  | 67  | 1.36    | 1.23    | 1.20    |
| 349 | Beta-catenin-like protein 1 CTNNB1                                                 | Q8WYA6 | 65  | 3   | 4  | 4   | 5   | 1.33    | 1.33    | 1.67    |
| 350 | Beta-galactosidase GLB1                                                            | P16278 | 76  | 11  | 10 | 11  | 10  | 0.91    | 1.00    | 0.91    |
| 351 | Beta-hexosaminidase subunit alpha HEXA                                             | P06865 | 61  | 0   | 4  | 2   | 4   | #DIV/0! | #DIV/0! | #DIV/0! |
| 352 | Beta-hexosaminidase subunit beta HEXB                                              | P07686 | 63  | 11  | 20 | 11  | 8   | 1.82    | 1.00    | 0.73    |
| 353 | BH3-interacting domain death agonist BID                                           | P55957 | 22  | 3   | 4  | 4   | 2   | 1.33    | 1.33    | 0.67    |
| 354 | Bifunctional 3'-phosphoadenosine 5'-phosphosulfate synthase 1 PAPSS1               | O43252 | 71  | 3   | 5  | 7   | 7   | 1.67    | 2.33    | 2.33    |
| 355 | Bifunctional ATP-dependent dihydroxyacetone kinase/FAD-AMP lyase (cyclizing) DAK   | Q3LXA3 | 59  | 0   | 2  | 3   | 0   | #DIV/0! | #DIV/0! | #DIV/0! |
| 356 | Bifunctional glutamate/proline-tRNA ligase EPRS                                    | P07814 | 171 | 95  | 85 | 100 | 85  | 0.89    | 1.05    | 0.89    |
| 357 | Bifunctional methylenetetrahydrofolate dehydrogenase/cyclohydrolase, mitochondrial | P13995 | 38  | 3   | 6  | 2   | 2   | 2.00    | 0.67    | 0.67    |
| 358 | Bifunctional purine biosynthesis protein PURH ATIC                                 | P31939 | 65  | 44  | 47 | 51  | 47  | 1.07    | 1.16    | 1.07    |
| 359 | Biliverdin reductase A BLVRA                                                       | P53004 | 33  | 21  | 15 | 17  | 15  | 0.71    | 0.81    | 0.71    |
| 360 | Biogenesis of lysosome-related organelles complex 1 subunit 1 BLOC1S1              | P78537 | 17  | 3   | 3  | 2   | 2   | 1.00    | 0.67    | 0.67    |
| 361 | Bis(5'-nucleosyl)-tetraphosphatase [asymmetrical] NUDT2                            | P50583 | 17  | 7   | 9  | 12  | 12  | 1.29    | 1.71    | 1.71    |
| 362 | Bisphosphoglycerate mutase BPGM                                                    | P07738 | 30  | 4   | 11 | 8   | 7   | 2.75    | 2.00    | 1.75    |
| 363 | BoA-like protein 2 BOLA2                                                           | Q9H3K6 | 10  | 26  | 15 | 21  | 7   | 0.58    | 0.81    | 0.27    |
| 364 | Brain acid soluble protein 1 BASP1                                                 | P80723 | 23  | 10  | 17 | 9   | 10  | 1.70    | 0.90    | 1.00    |
| 365 | Branched-chain-amino-acid aminotransferase, mitochondrial BCAT2                    | O15382 | 44  | 0   | 0  | 2   | 0   | #DIV/0! | #DIV/0! | #DIV/0! |
| 366 | Brefeldin A-inhibited guanine nucleotide-exchange protein 1 ARFGEF1                | Q9Y6D6 | 209 | 5   | 3  | 5   | 2   | 0.60    | 1.00    | 0.40    |
| 367 | BTB/POZ domain-containing protein KCTD12 KCTD12                                    | Q96CX2 | 36  | 13  | 8  | 10  | 8   | 0.62    | 0.77    | 0.62    |
| 368 | C-1-tetrahydrofolate synthase, cytoplasmic MTHFD1                                  | P11586 | 102 | 25  | 25 | 28  | 21  | 1.00    | 1.12    | 0.84    |
| 369 | CAD protein CAD                                                                    | P27708 | 243 | 44  | 39 | 47  | 55  | 0.89    | 1.07    | 1.25    |
| 370 | Cadherin-1 CDH1                                                                    | P12830 | 97  | 11  | 10 | 9   | 9   | 0.91    | 0.82    | 0.82    |
| 371 | Calcineurin B homologous protein 1 CHP1                                            | Q99653 | 22  | 2   | 0  | 5   | 0   | 0.00    | 2.50    | 0.00    |
| 372 | Calcium-binding mitochondrial carrier protein ScaMC-1 SLC25A24                     | Q6NUK1 | 53  | 2   | 0  | 0   | 3   | 0.00    | 0.00    | 1.50    |
| 373 | Calcium-binding protein 39 CAB39                                                   | Q9Y376 | 40  | 20  | 15 | 19  | 15  | 0.75    | 0.95    | 0.75    |
| 374 | Calcyclin-binding protein CACYBP                                                   | Q9HB71 | 26  | 7   | 13 | 9   | 5   | 1.86    | 1.29    | 0.71    |
| 375 | Caldesmon CALD1                                                                    | Q05682 | 93  | 32  | 34 | 33  | 33  | 1.06    | 1.03    | 1.03    |
| 376 | Calmodulin CALM1                                                                   | P62158 | 17  | 14  | 14 | 15  | 13  | 1.00    | 1.07    | 0.93    |
| 377 | Calnexin CANX                                                                      | P27824 | 68  | 71  | 70 | 69  | 79  | 0.99    | 0.97    | 1.11    |
| 378 | Calpain small subunit 1 CAPNS1                                                     | P04632 | 28  | 45  | 48 | 40  | 63  | 1.07    | 0.89    | 1.40    |
| 379 | Calpain small subunit 2 CAPNS2                                                     | Q96L46 | 28  | 0   | 5  | 4   | 2   | #DIV/0! | #DIV/0! | #DIV/0! |
| 380 | Calpain-1 catalytic subunit CAPN1                                                  | P07384 | 82  | 92  | 93 | 114 | 106 | 1.01    | 1.24    | 1.15    |
| 381 | Calpain-2 catalytic subunit CAPN2                                                  | P17655 | 80  | 75  | 78 | 74  | 69  | 1.04    | 0.99    | 0.92    |
| 382 | Calpastatin CAST                                                                   | P20810 | 77  | 24  | 20 | 25  | 27  | 0.83    | 1.04    | 1.13    |
| 383 | Calponin-2 CNN2                                                                    | Q99439 | 34  | 44  | 41 | 33  | 27  | 0.93    | 0.75    | 0.61    |
| 384 | Calponin-3 CNN3                                                                    | Q15417 | 36  | 9   | 10 | 19  | 11  | 1.11    | 2.11    | 1.22    |
| 385 | Calreticulin CALR                                                                  | P27797 | 48  | 80  | 57 | 58  | 59  | 0.71    | 0.73    | 0.74    |
| 386 | Calumenin CALU                                                                     | O43852 | 37  | 5   | 10 | 8   | 7   | 2.00    | 1.60    | 1.40    |
| 387 | cAMP-dependent protein kinase type I-alpha regulatory subunit PRKAR1A              | P10644 | 43  | 0   | 0  | 2   | 3   | #DIV/0! | #DIV/0! | #DIV/0! |
| 388 | cAMP-dependent protein kinase type II-alpha regulatory subunit PRKAR2A             | P13861 | 46  | 8   | 6  | 3   | 3   | 0.75    | 0.38    | 0.38    |
| 389 | CAP-Gly domain-containing linker protein 1 CLIP1                                   | P30622 | 162 | 10  | 17 | 19  | 16  | 1.70    | 1.90    | 1.60    |
| 390 | Caprin-1 CAPRIN1                                                                   | Q14444 | 78  | 12  | 10 | 9   | 8   | 0.83    | 0.75    | 0.67    |
| 391 | Carbonic anhydrase 2 CA2                                                           | P00918 | 29  | 5   | 2  | 4   | 7   | 0.40    | 0.80    | 1.40    |
| 392 | Carbonyl reductase [NADPH] 1 CBR1                                                  | P16152 | 30  | 42  | 42 | 47  | 46  | 1.00    | 1.12    | 1.10    |
| 393 | Carboxymethylenebutenolidase homolog CMBL                                          | Q96D66 | 28  | 0   | 3  | 3   | 0   | #DIV/0! | #DIV/0! | #DIV/0! |
| 394 | Cartilage-associated protein CRTAP                                                 | O75718 | 47  | 0   | 2  | 0   | 0   | #DIV/0! | #DIV/0! | #DIV/0! |
| 395 | Casein kinase I isoform alpha CSNK1A1                                              | P48729 | 39  | 7   | 12 | 7   | 5   | 1.71    | 1.00    | 0.71    |
| 396 | Casein kinase I isoform epsilon CSNK1E                                             | P49674 | 47  | 0   | 0  | 2   | 0   | #DIV/0! | #DIV/0! | #DIV/0! |
| 397 | Casein kinase II subunit alpha CSNK2A1                                             | P68400 | 45  | 20  | 18 | 20  | 18  | 0.90    | 1.00    | 0.90    |
| 398 | Casein kinase II subunit alpha' CSNK2A2                                            | P19784 | 41  | 14  | 8  | 4   | 3   | 0.57    | 0.29    | 0.21    |
| 399 | Casein kinase II subunit beta CSNK2B                                               | P67870 | 25  | 10  | 15 | 9   | 4   | 1.50    | 0.90    | 0.40    |
| 400 | Caspase-14 CASP14                                                                  | P31944 | 28  | 2   | 0  | 0   | 0   | 0.00    | 0.00    | 0.00    |
| 401 | Caspase-3 CASP3                                                                    | P42574 | 32  | 3   | 3  | 3   | 0   | 1.00    | 1.00    | 0.00    |
| 402 | Caspase-4 CASP4                                                                    | P49662 | 43  | 0   | 2  | 0   | 2   | #DIV/0! | #DIV/0! | #DIV/0! |
| 403 | Caspase-6 CASP6                                                                    | P55212 | 33  | 4   | 4  | 0   | 0   | 1.00    | 0.00    | 0.00    |
| 404 | Catechol O-methyltransferase COMT                                                  | P21964 | 30  | 34  | 47 | 48  | 48  | 1.38    | 1.41    | 1.41    |
| 405 | Catenin alpha-1 CTNNA1                                                             | P35221 | 100 | 102 | 82 | 93  | 86  | 0.80    | 0.91    | 0.84    |
| 406 | Catenin beta-1 CTNNB1                                                              | P35222 | 85  | 36  | 34 | 44  | 53  | 0.94    | 1.22    | 1.47    |
| 407 | Catenin delta-1 CTNND1                                                             | O60716 | 108 | 62  | 40 | 47  | 47  | 0.65    | 0.76    | 0.76    |



|     |                                                                                       |        |     |     |     |     |     |         |         |         |
|-----|---------------------------------------------------------------------------------------|--------|-----|-----|-----|-----|-----|---------|---------|---------|
| 408 | Cathepsin B CTSB                                                                      | P07858 | 38  | 48  | 44  | 41  | 41  | 0.92    | 0.85    | 0.85    |
| 409 | Cathepsin D CTSD                                                                      | P07339 | 45  | 77  | 78  | 74  | 84  | 1.01    | 0.96    | 1.09    |
| 410 | Cathepsin Z CTSZ                                                                      | Q9UBR2 | 34  | 6   | 6   | 5   | 6   | 1.00    | 0.83    | 1.00    |
| 411 | Cation-independent mannose-6-phosphate receptor IGF2R                                 | P11717 | 274 | 9   | 4   | 8   | 4   | 0.44    | 0.89    | 0.44    |
| 412 | Caveolin-1 CAV1                                                                       | Q03135 | 20  | 52  | 57  | 52  | 55  | 1.10    | 1.00    | 1.06    |
| 413 | Caveolin-2 CAV2                                                                       | P51636 | 18  | 6   | 0   | 6   | 5   | 0.00    | 1.00    | 0.83    |
| 414 | CCR4-NOT transcription complex subunit 1 CNOT1                                        | ASYKK6 | 267 | 2   | 0   | 0   | 0   | 0.00    | 0.00    | 0.00    |
| 415 | CD166 antigen ALCAM                                                                   | Q13740 | 65  | 0   | 0   | 0   | 3   | #DIV/0! | #DIV/0! | #DIV/0! |
| 416 | CD44 antigen CD44                                                                     | P16070 | 82  | 32  | 33  | 31  | 31  | 1.03    | 0.97    | 0.97    |
| 417 | CD59 glycoprotein CD59                                                                | P13987 | 14  | 22  | 24  | 29  | 37  | 1.09    | 1.32    | 1.68    |
| 418 | CD63 antigen CD63                                                                     | P08962 | 26  | 7   | 0   | 2   | 0   | 0.00    | 0.29    | 0.00    |
| 419 | CD81 antigen CD81                                                                     | P60033 | 26  | 8   | 7   | 6   | 6   | 0.88    | 0.75    | 0.75    |
| 420 | CD9 antigen CD9                                                                       | P21926 | 25  | 11  | 8   | 4   | 7   | 0.73    | 0.36    | 0.64    |
| 421 | Cdc42-interacting protein 4 TRIP10                                                    | Q15642 | 68  | 0   | 0   | 7   | 4   | #DIV/0! | #DIV/0! | #DIV/0! |
| 422 | CDGSH iron-sulfur domain-containing protein 2 CISD2                                   | Q8N5K1 | 15  | 8   | 5   | 8   | 7   | 0.63    | 1.00    | 0.88    |
| 423 | Cell cycle and apoptosis regulator protein 2 CCAR2                                    | Q8N163 | 103 | 23  | 14  | 22  | 20  | 0.61    | 0.96    | 0.87    |
| 424 | Cell differentiation protein RCD1 homolog RQCD1                                       | Q92600 | 34  | 0   | 3   | 0   | 0   | #DIV/0! | #DIV/0! | #DIV/0! |
| 425 | Cell division control protein 42 homolog CDC42                                        | P60953 | 21  | 76  | 63  | 58  | 69  | 0.83    | 0.76    | 0.91    |
| 426 | Cell division cycle and apoptosis regulator protein 1 CCAR1                           | Q8IX12 | 133 | 0   | 6   | 11  | 6   | #DIV/0! | #DIV/0! | #DIV/0! |
| 427 | Cell surface glycoprotein MUC18 MCAM                                                  | P43121 | 72  | 7   | 4   | 6   | 8   | 0.57    | 0.86    | 1.14    |
| 428 | Cellular nucleic acid-binding protein CNBP                                            | P62633 | 19  | 5   | 3   | 5   | 0   | 0.60    | 1.00    | 0.00    |
| 429 | Cellular retinoic acid-binding protein 2 CRABP2                                       | P29373 | 16  | 21  | 13  | 16  | 16  | 0.62    | 0.76    | 0.76    |
| 430 | Centromere/kinetochore protein zw10 homolog ZW10                                      | O43264 | 89  | 5   | 3   | 4   | 5   | 0.60    | 0.80    | 1.00    |
| 431 | Charged multivesicular body protein 1a CHMP1A                                         | Q9HD42 | 22  | 4   | 3   | 4   | 2   | 0.75    | 1.00    | 0.50    |
| 432 | Charged multivesicular body protein 1b CHMP1B                                         | Q7LBR1 | 22  | 0   | 5   | 4   | 0   | #DIV/0! | #DIV/0! | #DIV/0! |
| 433 | Charged multivesicular body protein 2a CHMP2A                                         | O43633 | 25  | 0   | 0   | 0   | 2   | #DIV/0! | #DIV/0! | #DIV/0! |
| 434 | Charged multivesicular body protein 3 CHMP3                                           | Q9Y3E7 | 25  | 0   | 0   | 0   | 4   | #DIV/0! | #DIV/0! | #DIV/0! |
| 435 | Charged multivesicular body protein 4b CHMP4B                                         | Q9H444 | 25  | 3   | 3   | 0   | 0   | 1.00    | 0.00    | 0.00    |
| 436 | Charged multivesicular body protein 6 CHMP6                                           | Q96F27 | 23  | 0   | 0   | 0   | 4   | #DIV/0! | #DIV/0! | #DIV/0! |
| 437 | Chloride intracellular channel protein 1 CLIC1                                        | O00299 | 27  | 103 | 110 | 95  | 123 | 1.07    | 0.92    | 1.19    |
| 438 | Chloride intracellular channel protein 3 CLIC3                                        | O95833 | 27  | 3   | 10  | 11  | 6   | 3.33    | 3.67    | 2.00    |
| 439 | Chloride intracellular channel protein 4 CLIC4                                        | Q9Y696 | 29  | 27  | 28  | 28  | 31  | 1.04    | 1.04    | 1.15    |
| 440 | Choline transporter-like protein 2 SLC44A2                                            | Q8IWA5 | 80  | 0   | 0   | 2   | 3   | #DIV/0! | #DIV/0! | #DIV/0! |
| 441 | Choline-phosphate cytidylyltransferase A PCYT1A                                       | P49585 | 42  | 0   | 4   | 5   | 4   | #DIV/0! | #DIV/0! | #DIV/0! |
| 442 | Chromobox protein homolog 3 CBX3                                                      | Q13185 | 21  | 12  | 9   | 15  | 11  | 0.75    | 1.25    | 0.92    |
| 443 | Citrate synthase, mitochondrial CS                                                    | O75390 | 52  | 23  | 24  | 20  | 19  | 1.04    | 0.87    | 0.83    |
| 444 | C-Jun-amino-terminal kinase-interacting protein 4 SPAG9                               | O60271 | 146 | 8   | 13  | 19  | 15  | 1.63    | 2.38    | 1.88    |
| 445 | Clathrin heavy chain 1 CLTC                                                           | Q00610 | 192 | 420 | 404 | 468 | 452 | 0.96    | 1.11    | 1.08    |
| 446 | Clathrin interactor 1 CLINT1                                                          | Q14677 | 68  | 5   | 10  | 14  | 10  | 2.00    | 2.80    | 2.00    |
| 447 | Clathrin light chain B CLTB                                                           | P09497 | 25  | 3   | 5   | 2   | 0   | 1.67    | 0.67    | 0.00    |
| 448 | Claudin-1 CLDN1                                                                       | O95832 | 23  | 6   | 5   | 4   | 6   | 0.83    | 0.67    | 1.00    |
| 449 | Cleavage and polyadenylation specificity factor subunit 5 NUDT21                      | O43809 | 26  | 9   | 12  | 13  | 10  | 1.33    | 1.44    | 1.11    |
| 450 | Cleavage and polyadenylation specificity factor subunit 6 CPSF6                       | Q16630 | 59  | 0   | 3   | 6   | 8   | #DIV/0! | #DIV/0! | #DIV/0! |
| 451 | CLIP-associating protein 1 CLASP1                                                     | Q72460 | 169 | 0   | 0   | 4   | 2   | #DIV/0! | #DIV/0! | #DIV/0! |
| 452 | Clustered mitochondria protein homolog CLUH                                           | O75153 | 147 | 5   | 11  | 11  | 11  | 2.20    | 2.20    | 2.20    |
| 453 | C-Myc-binding protein MYCBP                                                           | Q99417 | 12  | 5   | 2   | 4   | 4   | 0.40    | 0.80    | 0.80    |
| 454 | Coactosin-like protein COTL1                                                          | Q14019 | 16  | 28  | 25  | 25  | 26  | 0.89    | 0.89    | 0.93    |
| 455 | Coatamer subunit alpha COPA                                                           | P53621 | 138 | 109 | 130 | 156 | 139 | 1.19    | 1.43    | 1.28    |
| 456 | Coatamer subunit beta COPB1                                                           | P53618 | 107 | 93  | 66  | 96  | 82  | 0.71    | 1.03    | 0.88    |
| 457 | Coatamer subunit beta' COPB2                                                          | P35606 | 102 | 64  | 46  | 65  | 53  | 0.72    | 1.02    | 0.83    |
| 458 | Coatamer subunit delta ARCN1                                                          | P48444 | 57  | 42  | 43  | 44  | 39  | 1.02    | 1.05    | 0.93    |
| 459 | Coatamer subunit epsilon COPE                                                         | O14579 | 34  | 13  | 23  | 26  | 23  | 1.77    | 2.00    | 1.77    |
| 460 | Coatamer subunit gamma-1 COG1                                                         | Q9Y678 | 98  | 81  | 56  | 61  | 59  | 0.69    | 0.75    | 0.73    |
| 461 | Coatamer subunit gamma-2 COG2                                                         | Q9UBF2 | 98  | 15  | 14  | 18  | 17  | 0.93    | 1.20    | 1.13    |
| 462 | Coatamer subunit zeta-1 COPZ1                                                         | P61923 | 20  | 33  | 35  | 30  | 36  | 1.06    | 0.91    | 1.09    |
| 463 | Cocaine esterase CES2                                                                 | O00748 | 62  | 2   | 0   | 2   | 2   | 0.00    | 1.00    | 1.00    |
| 464 | Cofilin-1 CFL1                                                                        | P23528 | 19  | 191 | 177 | 183 | 173 | 0.93    | 0.96    | 0.91    |
| 465 | Cofilin-2 CFL2                                                                        | Q9Y281 | 19  | 15  | 17  | 19  | 11  | 1.13    | 1.27    | 0.73    |
| 466 | Coiled-coil domain-containing protein 124 CCDC124                                     | Q96C17 | 26  | 6   | 4   | 8   | 7   | 0.67    | 1.33    | 1.17    |
| 467 | Coiled-coil domain-containing protein 22 CCDC22                                       | O60826 | 71  | 3   | 4   | 5   | 5   | 1.33    | 1.67    | 1.67    |
| 468 | Coiled-coil domain-containing protein 25 CCDC25                                       | Q86WRO | 24  | 4   | 4   | 4   | 2   | 1.00    | 1.00    | 0.50    |
| 469 | Coiled-coil domain-containing protein 47 CCDC47                                       | Q96A33 | 56  | 3   | 3   | 0   | 4   | 1.00    | 0.00    | 1.33    |
| 470 | Coiled-coil domain-containing protein 6 CCDC6                                         | Q16204 | 53  | 7   | 4   | 9   | 6   | 0.57    | 1.29    | 0.86    |
| 471 | Coiled-coil-helix-coiled-coil-helix domain-containing protein 2, mitochondrial CHCHD2 | Q9Y6H1 | 16  | 0   | 0   | 2   | 0   | #DIV/0! | #DIV/0! | #DIV/0! |
| 472 | Cold shock domain-containing protein E1 CSDE1                                         | O75534 | 89  | 19  | 25  | 14  | 9   | 1.32    | 0.74    | 0.47    |
| 473 | Cold-inducible RNA-binding protein CIRBP                                              | Q14011 | 19  | 2   | 5   | 0   | 2   | 2.50    | 0.00    | 1.00    |
| 474 | Collagen alpha-1(XVII) chain COL17A1                                                  | Q9UMD9 | 150 | 0   | 4   | 4   | 4   | #DIV/0! | #DIV/0! | #DIV/0! |
| 475 | COMM domain-containing protein 1 COMMD1                                               | Q8N668 | 21  | 0   | 0   | 2   | 0   | #DIV/0! | #DIV/0! | #DIV/0! |
| 476 | COMM domain-containing protein 2 COMMD2                                               | Q86X83 | 23  | 0   | 4   | 4   | 0   | #DIV/0! | #DIV/0! | #DIV/0! |
| 477 | COMM domain-containing protein 3 COMMD3                                               | Q9UBI1 | 22  | 7   | 8   | 7   | 3   | 1.14    | 1.00    | 0.43    |
| 478 | COMM domain-containing protein 4 COMMD4                                               | Q9H0A8 | 22  | 6   | 4   | 7   | 3   | 0.67    | 1.17    | 0.50    |
| 479 | COMM domain-containing protein 6 COMMD6                                               | Q72461 | 10  | 2   | 0   | 2   | 0   | 0.00    | 1.00    | 0.00    |
| 480 | COMM domain-containing protein 7 COMMD7                                               | Q86VX2 | 23  | 0   | 0   | 2   | 0   | #DIV/0! | #DIV/0! | #DIV/0! |
| 481 | COMM domain-containing protein 8 COMMD8                                               | Q9NX08 | 21  | 4   | 3   | 0   | 0   | 0.75    | 0.00    | 0.00    |
| 482 | COMM domain-containing protein 9 COMMD9                                               | Q9P000 | 22  | 6   | 2   | 6   | 3   | 0.33    | 1.00    | 0.50    |
| 483 | Complement component 1 Q subcomponent-binding protein, mitochondrial C1QB             | Q07021 | 31  | 12  | 9   | 11  | 17  | 0.75    | 0.92    | 1.42    |
| 484 | Complex III assembly factor LYRM7 LYRM7                                               | Q5U5X0 | 12  | 2   | 2   | 0   | 0   | 1.00    | 0.00    | 0.00    |
| 485 | Constitutive coactivator of PPAR-gamma-like protein 1 FAM120A                         | Q9NZB2 | 122 | 5   | 4   | 3   | 6   | 0.80    | 0.60    | 1.20    |
| 486 | COP9 signalosome complex subunit 1 GPS1                                               | Q13098 | 56  | 6   | 13  | 14  | 14  | 2.17    | 2.33    | 2.33    |
| 487 | COP9 signalosome complex subunit 2 COPS2                                              | P61201 | 52  | 6   | 5   | 8   | 10  | 0.83    | 1.33    | 1.67    |
| 488 | COP9 signalosome complex subunit 3 COPS3                                              | Q9UNSD | 48  | 5   | 12  | 12  | 10  | 2.40    | 2.40    | 2.00    |
| 489 | COP9 signalosome complex subunit 4 COPS4                                              | Q9BT78 | 46  | 7   | 13  | 14  | 11  | 1.86    | 2.00    | 1.57    |

|     |                                                                      |             |     |     |     |     |     |         |         |         |
|-----|----------------------------------------------------------------------|-------------|-----|-----|-----|-----|-----|---------|---------|---------|
| 490 | COP9 signalosome complex subunit 5 COP55                             | Q92905      | 38  | 9   | 13  | 14  | 12  | 1.44    | 1.56    | 1.33    |
| 491 | COP9 signalosome complex subunit 6 COP56                             | Q7L5N1      | 36  | 8   | 11  | 16  | 14  | 1.38    | 2.00    | 1.75    |
| 492 | COP9 signalosome complex subunit 7a COP57A                           | Q9UBW8      | 30  | 9   | 2   | 8   | 7   | 0.22    | 0.89    | 0.78    |
| 493 | COP9 signalosome complex subunit 8 COP58                             | Q99627      | 23  | 2   | 8   | 5   | 2   | 4.00    | 2.50    | 1.00    |
| 494 | Copine-1 CPNE1                                                       | Q99829      | 59  | 8   | 8   | 4   | 5   | 1.00    | 0.50    | 0.63    |
| 495 | Copine-3 CPNE3                                                       | O75131      | 60  | 8   | 9   | 12  | 17  | 1.13    | 1.50    | 2.13    |
| 496 | Copper transport protein ATOX1 ATOX1                                 | O00244      | 7   | 6   | 6   | 7   | 0   | 1.00    | 1.17    | 0.00    |
| 497 | Core-binding factor subunit beta CBFβ                                | Q13951      | 22  | 4   | 3   | 0   | 2   | 0.75    | 0.00    | 0.50    |
| 498 | Coronin-A SPRR1A                                                     | P35321      | 10  | 20  | 11  | 12  | 17  | 0.55    | 0.60    | 0.85    |
| 499 | Coronin-1B CORO1B                                                    | Q9BR76      | 54  | 8   | 13  | 13  | 10  | 1.63    | 1.63    | 1.25    |
| 500 | Coronin-1C CORO1C                                                    | Q9ULV4      | 53  | 21  | 29  | 30  | 28  | 1.38    | 1.43    | 1.33    |
| 501 | Coronin-7 CORO7                                                      | P57737      | 101 | 0   | 0   | 3   | 2   | #DIV/0! | #DIV/0! | #DIV/0! |
| 502 | Costars family protein ABRACL ABRACL                                 | Q9P1F3      | 9   | 5   | 3   | 3   | 3   | 0.60    | 0.60    | 0.60    |
| 503 | Creatine kinase U-type, mitochondrial CKMT1A                         | P12532      | 47  | 12  | 12  | 9   | 10  | 1.00    | 0.75    | 0.83    |
| 504 | Crk-like protein CRKL                                                | P46109      | 34  | 9   | 7   | 9   | 4   | 0.78    | 1.00    | 0.44    |
| 505 | CTP synthase 1 CTPS1                                                 | P17812      | 67  | 19  | 25  | 30  | 28  | 1.32    | 1.58    | 1.47    |
| 506 | CTP synthase 2 CTPS2                                                 | Q9NRF8      | 66  | 0   | 5   | 5   | 7   | #DIV/0! | #DIV/0! | #DIV/0! |
| 507 | Cullin-1 CUL1                                                        | Q13616      | 90  | 3   | 3   | 0   | 3   | 1.00    | 0.00    | 1.00    |
| 508 | Cullin-2 CUL2                                                        | Q13617      | 87  | 5   | 0   | 3   | 0   | 0.00    | 0.60    | 0.00    |
| 509 | Cullin-3 CUL3                                                        | Q13618      | 89  | 13  | 6   | 12  | 8   | 0.46    | 0.92    | 0.62    |
| 510 | Cullin-4A CUL4A                                                      | Q13619      | 88  | 5   | 5   | 5   | 7   | 1.00    | 1.00    | 1.40    |
| 511 | Cullin-associated NEDD8-dissociated protein 1 CAND1                  | Q86VPE      | 136 | 82  | 84  | 79  | 79  | 1.02    | 0.96    | 0.96    |
| 512 | C-X-C motif chemokine 10 CXCL10                                      | P02778      | 11  | 0   | 7   | 0   | 0   | #DIV/0! | #DIV/0! | #DIV/0! |
| 513 | Cyclin-D1-binding protein 1 CCNDBP1                                  | O95273      | 40  | 0   | 4   | 0   | 0   | #DIV/0! | #DIV/0! | #DIV/0! |
| 514 | Cyclin-dependent kinase 1 CDK1                                       | P06493      | 34  | 3   | 0   | 0   | 0   | 0.00    | 0.00    | 0.00    |
| 515 | Cyclin-dependent kinase 11B CDK11B                                   | P21127 (+1) | 93  | 3   | 2   | 0   | 2   | 0.67    | 0.00    | 0.67    |
| 516 | Cyclin-dependent kinase 6 CDK6                                       | Q00534      | 37  | 3   | 6   | 6   | 0   | 2.00    | 2.00    | 0.00    |
| 517 | Cyclin-G-associated kinase GAK                                       | O14976      | 143 | 2   | 0   | 0   | 0   | 0.00    | 0.00    | 0.00    |
| 518 | Cystatin-A CSTA                                                      | P01040      | 11  | 6   | 8   | 7   | 5   | 1.33    | 1.17    | 0.83    |
| 519 | Cystatin-B CSTB                                                      | P04080      | 11  | 35  | 29  | 31  | 33  | 0.83    | 0.89    | 0.94    |
| 520 | Cysteine and glycine-rich protein 1 CSRP1                            | P21291      | 21  | 34  | 43  | 45  | 37  | 1.26    | 1.32    | 1.09    |
| 521 | Cysteine and glycine-rich domain 2 CSRP2                             | Q16527      | 21  | 3   | 2   | 0   | 0   | 0.67    | 0.00    | 0.00    |
| 522 | Cysteine and histidine-rich domain-containing protein 1 CHORDC1      | Q9UHD1      | 37  | 7   | 6   | 6   | 5   | 0.86    | 0.86    | 0.71    |
| 523 | Cysteine protease ATG4B ATG4B                                        | Q9Y4P1      | 44  | 0   | 2   | 0   | 2   | #DIV/0! | #DIV/0! | #DIV/0! |
| 524 | Cysteine-rich protein 2 CRIP2                                        | P52943      | 22  | 6   | 6   | 5   | 5   | 1.00    | 0.83    | 0.83    |
| 525 | Cysteine-tRNA ligase, cytoplasmic CARS                               | P49589      | 85  | 21  | 23  | 34  | 24  | 1.10    | 1.62    | 1.14    |
| 526 | Cytochrome b5 type B CYB5B                                           | O43169      | 16  | 6   | 3   | 5   | 2   | 0.50    | 0.83    | 0.33    |
| 527 | Cytochrome b-c1 complex subunit 2, mitochondrial UQCRC2              | P22695      | 48  | 0   | 3   | 0   | 4   | #DIV/0! | #DIV/0! | #DIV/0! |
| 528 | Cytochrome b-c1 complex subunit 7 UQCRCB                             | P14927      | 14  | 3   | 0   | 0   | 0   | 0.00    | 0.00    | 0.00    |
| 529 | Cytochrome b-c1 complex subunit 8 UQCRCQ                             | O14949      | 10  | 2   | 0   | 0   | 0   | 0.00    | 0.00    | 0.00    |
| 530 | Cytochrome c CYCS                                                    | P99999      | 12  | 6   | 7   | 7   | 5   | 1.17    | 1.17    | 0.83    |
| 531 | Cytochrome c oxidase assembly factor 3 homolog, mitochondrial COA3   | Q9Y2R0      | 12  | 7   | 5   | 3   | 0   | 0.71    | 0.43    | 0.00    |
| 532 | Cytochrome c oxidase protein 20 homolog COX20                        | Q5R115      | 13  | 0   | 0   | 0   | 3   | #DIV/0! | #DIV/0! | #DIV/0! |
| 533 | Cytochrome c oxidase subunit 2 MT-CO2                                | P00403      | 26  | 8   | 7   | 4   | 2   | 0.88    | 0.50    | 0.25    |
| 534 | Cytochrome c oxidase subunit 4 isoform 1, mitochondrial COX4I1       | P13073      | 20  | 0   | 0   | 0   | 6   | #DIV/0! | #DIV/0! | #DIV/0! |
| 535 | Cytochrome c oxidase subunit 5A, mitochondrial COX5A                 | P20674      | 17  | 0   | 0   | 2   | 0   | #DIV/0! | #DIV/0! | #DIV/0! |
| 536 | Cytochrome c oxidase subunit 6C COX6C                                | P09669      | 9   | 4   | 0   | 0   | 0   | 0.00    | 0.00    | 0.00    |
| 537 | Cytochrome c oxidase subunit NDUF4A NDUF4A                           | O00483      | 9   | 3   | 6   | 0   | 3   | 2.00    | 0.00    | 1.00    |
| 538 | Cytochrome P450 20A1 CYP20A1                                         | Q6UW02      | 52  | 0   | 2   | 2   | 0   | #DIV/0! | #DIV/0! | #DIV/0! |
| 539 | Cytoglobin CYGB                                                      | Q8WWM9      | 21  | 20  | 19  | 16  | 8   | 0.95    | 0.80    | 0.40    |
| 540 | Cytoplasmic aconitase hydratase ACO1                                 | P21399      | 98  | 16  | 11  | 16  | 12  | 0.69    | 1.00    | 0.75    |
| 541 | Cytoplasmic dynein 1 heavy chain 1 DYNC1H1                           | Q14204      | 532 | 425 | 579 | 524 | 572 | 1.36    | 1.23    | 1.35    |
| 542 | Cytoplasmic dynein 1 intermediate chain 2 DYNC1I2                    | Q13409      | 71  | 10  | 12  | 18  | 21  | 1.20    | 1.80    | 2.10    |
| 543 | Cytoplasmic dynein 1 light intermediate chain 1 DYNC1L1              | Q9Y6G9      | 57  | 3   | 4   | 3   | 0   | 1.33    | 1.00    | 0.00    |
| 544 | Cytoplasmic dynein 1 light intermediate chain 2 DYNC1L2              | O43237      | 54  | 2   | 5   | 8   | 10  | 2.50    | 4.00    | 5.00    |
| 545 | Cytoplasmic FMR1-interacting protein 1 CYFIP1                        | Q7L576      | 145 | 50  | 51  | 63  | 57  | 1.02    | 1.26    | 1.14    |
| 546 | Cytoskeleton-associated protein 4 CKAP4                              | Q07065      | 66  | 17  | 17  | 29  | 33  | 1.00    | 1.71    | 1.94    |
| 547 | Cytoskeleton-associated protein 5 CKAP5                              | Q14008      | 226 | 0   | 3   | 2   | 6   | #DIV/0! | #DIV/0! | #DIV/0! |
| 548 | Cytosol aminopeptidase LAP3                                          | P28838      | 56  | 15  | 14  | 19  | 14  | 0.93    | 1.27    | 0.93    |
| 549 | Cytosolic acyl coenzyme A thioester hydrolase ACOT7                  | O00154      | 42  | 26  | 34  | 34  | 34  | 1.31    | 1.31    | 1.31    |
| 550 | Cytosolic Fe-S cluster assembly factor NUBP2 NUBP2                   | Q9Y5Y2      | 29  | 7   | 6   | 6   | 3   | 0.86    | 0.86    | 0.43    |
| 551 | Cytosolic non-specific dipeptidase CNDP2                             | Q96KP4      | 53  | 40  | 33  | 41  | 36  | 0.83    | 1.03    | 0.90    |
| 552 | Cytosolic purine 5'-nucleotidase NT5C2                               | P49902      | 65  | 0   | 2   | 4   | 5   | #DIV/0! | #DIV/0! | #DIV/0! |
| 553 | D-3-phosphoglycerate dehydrogenase PHGDH                             | O43175      | 57  | 23  | 21  | 20  | 17  | 0.91    | 0.87    | 0.74    |
| 554 | DAZ-associated protein 1 DAZAP1                                      | Q96EP5      | 43  | 0   | 3   | 2   | 0   | #DIV/0! | #DIV/0! | #DIV/0! |
| 555 | DCC-interacting protein 13-alpha APPL1                               | Q9UKG1      | 80  | 0   | 3   | 0   | 2   | #DIV/0! | #DIV/0! | #DIV/0! |
| 556 | DCN1-like protein 1 DCUN1D1                                          | Q96GG9      | 30  | 0   | 11  | 9   | 4   | #DIV/0! | #DIV/0! | #DIV/0! |
| 557 | D-dopachrome decarboxylase DDT                                       | P30046      | 13  | 12  | 10  | 12  | 11  | 0.83    | 1.00    | 0.92    |
| 558 | DDRKG domain-containing protein 1 DDRGK1                             | Q96HY6      | 36  | 3   | 5   | 5   | 3   | 1.67    | 1.67    | 1.00    |
| 559 | Dedicator of cytokinesis protein 5 DOCK5                             | Q9H7D0      | 215 | 0   | 2   | 0   | 0   | #DIV/0! | #DIV/0! | #DIV/0! |
| 560 | Dedicator of cytokinesis protein 7 DOCK7                             | Q96N67      | 243 | 9   | 4   | 9   | 6   | 0.44    | 1.00    | 0.67    |
| 561 | Dehydrogenase/reductase SDR family member 4 DHR54                    | Q9BTZ2      | 30  | 0   | 2   | 4   | 0   | #DIV/0! | #DIV/0! | #DIV/0! |
| 562 | Dehydrogenase/reductase SDR family member 7 DHR57                    | Q9Y394      | 38  | 18  | 16  | 10  | 8   | 0.89    | 0.56    | 0.44    |
| 563 | Delta(24)-sterol reductase DHCR24                                    | Q15392      | 60  | 0   | 2   | 0   | 0   | #DIV/0! | #DIV/0! | #DIV/0! |
| 564 | Delta(3,5)-Delta(2,4)-dienoyl-CoA isomerase, mitochondrial ECH1      | Q13011      | 36  | 9   | 10  | 11  | 9   | 1.11    | 1.22    | 1.00    |
| 565 | Delta-1-pyrroline-5-carboxylate dehydrogenase, mitochondrial ALDH4A1 | P30038      | 62  | 0   | 3   | 0   | 0   | #DIV/0! | #DIV/0! | #DIV/0! |
| 566 | Delta-1-pyrroline-5-carboxylate synthase ALDH18A1                    | P54886      | 87  | 13  | 14  | 11  | 10  | 1.08    | 0.85    | 0.77    |
| 567 | Density-regulated protein DENR                                       | O43583      | 22  | 6   | 0   | 5   | 0   | 0.00    | 0.83    | 0.00    |
| 568 | Deoxycytidylate deaminase DCDT                                       | P32321      | 20  | 5   | 4   | 6   | 5   | 0.80    | 1.20    | 1.00    |
| 569 | Deoxyribose-phosphate aldolase DERA                                  | Q9Y315      | 35  | 11  | 6   | 8   | 5   | 0.55    | 0.73    | 0.45    |
| 570 | Deoxyuridine 5'-triphosphate nucleotidohydrolase, mitochondrial DUT  | P33316      | 27  | 2   | 0   | 4   | 0   | 0.00    | 2.00    | 0.00    |
| 571 | Derlin-1 DERL1                                                       | Q9BUN8      | 29  | 0   | 0   | 2   | 0   | #DIV/0! | #DIV/0! | #DIV/0! |



|     |                                                                                      |        |     |     |     |     |     |         |         |         |
|-----|--------------------------------------------------------------------------------------|--------|-----|-----|-----|-----|-----|---------|---------|---------|
| 572 | Dermcidin DCD                                                                        | P81605 | 11  | 4   | 10  | 3   | 2   | 2.50    | 0.75    | 0.50    |
| 573 | Desmocollin-1 DSC1                                                                   | Q08554 | 100 | 0   | 4   | 0   | 0   | #DIV/0! | #DIV/0! | #DIV/0! |
| 574 | Desmoglein-1 DSG1                                                                    | Q02413 | 114 | 3   | 10  | 4   | 0   | 3.33    | 1.33    | 0.00    |
| 575 | Desmoplakin DSP                                                                      | P15924 | 332 | 385 | 268 | 176 | 161 | 0.70    | 0.46    | 0.42    |
| 576 | Destrin DSTN                                                                         | P60981 | 19  | 73  | 56  | 56  | 62  | 0.77    | 0.77    | 0.85    |
| 577 | Deubiquitinating protein VCIP135 VCPIP1                                              | Q96JH7 | 134 | 0   | 0   | 2   | 2   | #DIV/0! | #DIV/0! | #DIV/0! |
| 578 | Developmentally-regulated GTP-binding protein 1 DRG1                                 | Q9Y295 | 41  | 4   | 0   | 4   | 3   | 0.00    | 1.00    | 0.75    |
| 579 | Developmentally-regulated GTP-binding protein 2 DRG2                                 | P55039 | 41  | 2   | 3   | 0   | 0   | 1.50    | 0.00    | 0.00    |
| 580 | Diablo homolog, mitochondrial DIABLO                                                 | Q9NR28 | 27  | 2   | 7   | 6   | 2   | 3.50    | 3.00    | 1.00    |
| 581 | Diacylglycerol kinase alpha DGKA                                                     | P23743 | 83  | 9   | 10  | 14  | 12  | 1.11    | 1.56    | 1.33    |
| 582 | Dihydrolipoyl dehydrogenase, mitochondrial DLD                                       | P09622 | 54  | 20  | 17  | 17  | 17  | 0.85    | 0.85    | 0.85    |
| 583 | Dihydrolipoyllysine-residue acetyltransferase component of pyruvate dehydrogenase c  | P10515 | 69  | 15  | 11  | 14  | 15  | 0.73    | 0.93    | 1.00    |
| 584 | Dihydrolipoyllysine-residue succinyltransferase component of 2-oxoglutarate dehydrog | P36957 | 49  | 20  | 21  | 19  | 22  | 1.05    | 0.95    | 1.10    |
| 585 | Dihydropteridine reductase QDPR                                                      | P09417 | 26  | 15  | 16  | 17  | 13  | 1.07    | 1.13    | 0.87    |
| 586 | Dihydropyrimidinase-related protein 2 DPYSL2                                         | Q16555 | 62  | 20  | 21  | 27  | 29  | 1.05    | 1.35    | 1.45    |
| 587 | Dihydropyrimidinase-related protein 3 DPYSL3                                         | Q14195 | 62  | 0   | 5   | 5   | 4   | #DIV/0! | #DIV/0! | #DIV/0! |
| 588 | Dipeptidyl peptidase 1 CTSC                                                          | P53634 | 52  | 19  | 13  | 17  | 12  | 0.68    | 0.89    | 0.63    |
| 589 | Dipeptidyl peptidase 3 DPP3                                                          | Q9NYS3 | 83  | 51  | 43  | 52  | 53  | 0.84    | 1.02    | 1.04    |
| 590 | Dipeptidyl peptidase 9 DPP9                                                          | Q86T12 | 98  | 6   | 3   | 2   | 4   | 0.50    | 0.33    | 0.67    |
| 591 | Diphosphoinositol polyphosphate phosphohydrolase 2 NUDT4                             | Q9NZJ9 | 20  | 0   | 3   | 2   | 0   | #DIV/0! | #DIV/0! | #DIV/0! |
| 592 | Diphosphomevalonate decarboxylase MVD                                                | P52602 | 43  | 5   | 12  | 8   | 10  | 2.40    | 1.60    | 2.00    |
| 593 | Disks large homolog 1 DLG1                                                           | Q12959 | 100 | 2   | 0   | 0   | 3   | 0.00    | 0.00    | 1.50    |
| 594 | DNA damage-binding protein 1 DDB1                                                    | Q16531 | 127 | 14  | 17  | 14  | 16  | 1.21    | 1.00    | 1.14    |
| 595 | DNA dC->dU-editing enzyme APOBEC-3C APOBEC3C                                         | Q9NRW3 | 23  | 0   | 3   | 0   | 0   | #DIV/0! | #DIV/0! | #DIV/0! |
| 596 | DNA repair protein RAD50 RAD50                                                       | Q92878 | 154 | 0   | 2   | 2   | 2   | #DIV/0! | #DIV/0! | #DIV/0! |
| 597 | DNA replication licensing factor MCM7 MCM7                                           | P33993 | 81  | 0   | 0   | 0   | 2   | #DIV/0! | #DIV/0! | #DIV/0! |
| 598 | DNA-(apurinic or apyrimidinic site) lyase APEX1                                      | P27695 | 36  | 8   | 15  | 13  | 10  | 1.88    | 1.63    | 1.25    |
| 599 | DNA-dependent protein kinase catalytic subunit PRKDC                                 | P78527 | 469 | 42  | 113 | 61  | 120 | 2.69    | 1.45    | 2.86    |
| 600 | DNA-directed RNA polymerase II subunit RP2 POLR2B                                    | P30876 | 134 | 2   | 3   | 4   | 0   | 1.50    | 2.00    | 0.00    |
| 601 | DNA-directed RNA polymerase II subunit RP3 POLR2C                                    | P19387 | 31  | 0   | 2   | 0   | 0   | #DIV/0! | #DIV/0! | #DIV/0! |
| 602 | DNA-directed RNA polymerase II subunit RP7 POLR2G                                    | P62487 | 19  | 0   | 0   | 2   | 0   | #DIV/0! | #DIV/0! | #DIV/0! |
| 603 | DNA-directed RNA polymerases I and III subunit RPAC1 POLR1C                          | O15160 | 39  | 0   | 0   | 2   | 0   | #DIV/0! | #DIV/0! | #DIV/0! |
| 604 | DNA-directed RNA polymerases I, II, and III subunit RPABC1 POLR2E                    | P19388 | 25  | 0   | 4   | 0   | 0   | #DIV/0! | #DIV/0! | #DIV/0! |
| 605 | DNA-directed RNA polymerases I, II, and III subunit RPABC3 POLR2H                    | P52434 | 17  | 3   | 5   | 5   | 4   | 1.67    | 1.67    | 1.33    |
| 606 | DNA-directed RNA polymerases I, II, and III subunit RPABC5 POLR2L                    | P62875 | 8   | 4   | 0   | 0   | 3   | 0.00    | 0.00    | 0.75    |
| 607 | DnaJ homolog subfamily A member 1 DNAJA1                                             | P31689 | 45  | 12  | 9   | 12  | 14  | 0.75    | 1.00    | 1.17    |
| 608 | DnaJ homolog subfamily A member 2 DNAJA2                                             | O60884 | 46  | 3   | 3   | 8   | 8   | 1.00    | 2.67    | 2.67    |
| 609 | DnaJ homolog subfamily B member 1 DNAJB1                                             | P25685 | 38  | 9   | 6   | 5   | 4   | 0.67    | 0.56    | 0.44    |
| 610 | DnaJ homolog subfamily B member 11 DNAJB11                                           | Q9UBS4 | 41  | 3   | 4   | 3   | 5   | 1.33    | 1.00    | 1.67    |
| 611 | DnaJ homolog subfamily B member 6 DNAJB6                                             | O75190 | 36  | 3   | 7   | 2   | 0   | 2.33    | 0.67    | 0.00    |
| 612 | DnaJ homolog subfamily C member 10 DNAJC10                                           | Q8IXB1 | 91  | 0   | 2   | 4   | 2   | #DIV/0! | #DIV/0! | #DIV/0! |
| 613 | DnaJ homolog subfamily C member 13 DNAJC13                                           | O75165 | 254 | 3   | 0   | 4   | 3   | 0.00    | 1.33    | 1.00    |
| 614 | DnaJ homolog subfamily C member 3 DNAJC3                                             | Q13217 | 58  | 2   | 8   | 5   | 9   | 4.00    | 2.50    | 4.50    |
| 615 | DnaJ homolog subfamily C member 5 DNAJC5                                             | Q9H3Z4 | 22  | 4   | 8   | 9   | 4   | 2.00    | 2.25    | 1.00    |
| 616 | DnaJ homolog subfamily C member 7 DNAJC7                                             | Q99615 | 56  | 0   | 0   | 2   | 3   | #DIV/0! | #DIV/0! | #DIV/0! |
| 617 | DnaJ homolog subfamily C member 8 DNAJC8                                             | O75937 | 30  | 4   | 0   | 0   | 0   | 0.00    | 0.00    | 0.00    |
| 618 | Dolichol-phosphate mannosyltransferase subunit 1 DPM1                                | O60762 | 30  | 12  | 11  | 13  | 8   | 0.92    | 1.08    | 0.67    |
| 619 | Dolichol-phosphate mannosyltransferase subunit 3 DPM3                                | Q9P2X0 | 10  | 6   | 5   | 6   | 0   | 0.83    | 1.00    | 0.00    |
| 620 | Dolichyl-diphosphooligosaccharide--protein glycosyltransferase 48 kDa subunit DDOST  | P39656 | 51  | 7   | 7   | 5   | 9   | 1.00    | 0.71    | 1.29    |
| 621 | Dolichyl-diphosphooligosaccharide--protein glycosyltransferase subunit 1 RPN1        | P04843 | 69  | 29  | 28  | 24  | 42  | 0.97    | 0.83    | 1.45    |
| 622 | Dolichyl-diphosphooligosaccharide--protein glycosyltransferase subunit 2 RPN2        | P04844 | 69  | 12  | 10  | 9   | 12  | 0.83    | 0.75    | 1.00    |
| 623 | Dolichyl-diphosphooligosaccharide--protein glycosyltransferase subunit DAD1 DAD1     | P61803 | 12  | 11  | 11  | 15  | 8   | 1.00    | 1.36    | 0.73    |
| 624 | Dolichyl-phosphate beta-glucosyltransferase ALG5                                     | Q9V673 | 37  | 0   | 3   | 0   | 0   | #DIV/0! | #DIV/0! | #DIV/0! |
| 625 | Drebrin DBN1                                                                         | Q16643 | 71  | 36  | 29  | 35  | 33  | 0.81    | 0.97    | 0.92    |
| 626 | Drebrin-like protein DBNL                                                            | Q9JUJ6 | 48  | 10  | 9   | 7   | 10  | 0.90    | 0.70    | 1.00    |
| 627 | D-tyrosyl-tRNA(Tyr) deacylase 1 DTD1                                                 | Q8TEA8 | 23  | 3   | 6   | 4   | 4   | 2.00    | 1.33    | 1.33    |
| 628 | Dual specificity mitogen-activated protein kinase kinase 1 MAP2K1                    | Q02750 | 43  | 17  | 14  | 10  | 13  | 0.82    | 0.59    | 0.76    |
| 629 | Dual specificity mitogen-activated protein kinase kinase 2 MAP2K2                    | P36507 | 44  | 6   | 7   | 9   | 6   | 1.17    | 1.50    | 1.00    |
| 630 | Dual specificity protein phosphatase 14 DUSP14                                       | O95147 | 22  | 0   | 0   | 0   | 4   | #DIV/0! | #DIV/0! | #DIV/0! |
| 631 | Dual specificity protein phosphatase 23 DUSP23                                       | Q9BVI7 | 17  | 8   | 2   | 11  | 5   | 0.25    | 1.38    | 0.63    |
| 632 | Dual specificity protein phosphatase 3 DUSP3                                         | P51452 | 20  | 9   | 8   | 6   | 5   | 0.89    | 0.67    | 0.56    |
| 633 | Dynactin subunit 1 DCTN1                                                             | Q14203 | 142 | 36  | 55  | 61  | 61  | 1.53    | 1.69    | 1.69    |
| 634 | Dynactin subunit 2 DCTN2                                                             | Q13561 | 44  | 7   | 5   | 8   | 4   | 0.71    | 1.14    | 0.57    |
| 635 | Dynactin subunit 3 DCTN3                                                             | O75935 | 21  | 5   | 6   | 5   | 4   | 1.20    | 1.00    | 0.80    |
| 636 | Dynactin subunit 5 DCTN5                                                             | Q98TE1 | 20  | 3   | 3   | 0   | 4   | 1.00    | 0.00    | 1.33    |
| 637 | Dynactin subunit 6 DCTN6                                                             | O00399 | 21  | 3   | 3   | 3   | 0   | 1.00    | 1.00    | 0.00    |
| 638 | Dynamin-1-like protein DNM1L                                                         | O00429 | 82  | 43  | 42  | 49  | 40  | 0.98    | 1.14    | 0.93    |
| 639 | Dynamin-2 DNM2                                                                       | P50570 | 98  | 17  | 23  | 20  | 19  | 1.35    | 1.18    | 1.12    |
| 640 | Dynamin-like 120 kDa protein, mitochondrial OPA1                                     | O60313 | 112 | 3   | 6   | 5   | 5   | 2.00    | 1.67    | 1.67    |
| 641 | Dynein light chain 1, cytoplasmic DYNLL1                                             | P63167 | 10  | 27  | 22  | 24  | 15  | 0.81    | 0.89    | 0.56    |
| 642 | Dynein light chain roadblock-type 1 DYNLRB1                                          | Q9NP97 | 11  | 7   | 2   | 7   | 0   | 0.29    | 1.00    | 0.00    |
| 643 | Dynein light chain Ctctx-type 1 DYNLT1                                               | P63172 | 12  | 9   | 5   | 5   | 6   | 0.56    | 0.56    | 0.67    |
| 644 | Dystonin DST                                                                         | Q03001 | 861 | 99  | 67  | 41  | 43  | 0.68    | 0.41    | 0.43    |
| 645 | E2/E3 hybrid ubiquitin-protein ligase UBE2O UBE2O                                    | Q9C0C9 | 141 | 0   | 0   | 4   | 3   | #DIV/0! | #DIV/0! | #DIV/0! |
| 646 | E3 SUMO-protein ligase RanBP2 RANBP2                                                 | P49792 | 358 | 2   | 2   | 5   | 4   | 1.00    | 2.50    | 2.00    |
| 647 | E3 ubiquitin/ISG15 ligase TRIM25 TRIM25                                              | Q14258 | 71  | 6   | 3   | 3   | 5   | 0.50    | 0.50    | 0.83    |
| 648 | E3 ubiquitin-protein ligase CHIP STUB1                                               | Q9JUN7 | 35  | 4   | 7   | 7   | 4   | 1.75    | 1.75    | 1.00    |
| 649 | E3 ubiquitin-protein ligase HECTD1 HECTD1                                            | Q9ULT8 | 289 | 9   | 2   | 8   | 3   | 0.22    | 0.89    | 0.33    |
| 650 | E3 ubiquitin-protein ligase HECTD3 HECTD3                                            | Q5T447 | 97  | 0   | 3   | 0   | 0   | #DIV/0! | #DIV/0! | #DIV/0! |
| 651 | E3 ubiquitin-protein ligase HUWE1 HUWE1                                              | Q7Z6Z7 | 482 | 64  | 83  | 99  | 117 | 1.30    | 1.55    | 1.83    |
| 652 | E3 ubiquitin-protein ligase KCMF1 KCMF1                                              | Q9P0J7 | 42  | 0   | 2   | 2   | 0   | #DIV/0! | #DIV/0! | #DIV/0! |
| 653 | E3 ubiquitin-protein ligase listerin LTN1                                            | O94822 | 201 | 0   | 2   | 3   | 2   | #DIV/0! | #DIV/0! | #DIV/0! |

|     |                                                                           |        |     |     |     |     |     |         |         |         |
|-----|---------------------------------------------------------------------------|--------|-----|-----|-----|-----|-----|---------|---------|---------|
| 654 | E3 ubiquitin-protein ligase NEDD4-like NEDD4L                             | Q96PU5 | 112 | 0   | 0   | 2   | 3   | #DIV/0! | #DIV/0! | #DIV/0! |
| 655 | E3 ubiquitin-protein ligase RBX1 RBX1                                     | P62877 | 12  | 6   | 6   | 4   | 5   | 1.00    | 0.67    | 0.83    |
| 656 | E3 ubiquitin-protein ligase RNF213 RNF213                                 | Q63HN8 | 591 | 2   | 3   | 4   | 3   | 1.50    | 2.00    | 1.50    |
| 657 | E3 ubiquitin-protein ligase UBR4 UBR4                                     | Q5T457 | 574 | 76  | 113 | 142 | 131 | 1.49    | 1.87    | 1.72    |
| 658 | E3 UFM1-protein ligase 1 UFL1                                             | O94874 | 90  | 6   | 7   | 11  | 8   | 1.17    | 1.83    | 1.33    |
| 659 | Early endosome antigen 1 EEA1                                             | Q15075 | 162 | 26  | 37  | 50  | 47  | 1.42    | 1.92    | 1.81    |
| 660 | Echinoderm microtubule-associated protein-like 2 EML2                     | O95834 | 71  | 2   | 3   | 0   | 0   | 1.50    | 0.00    | 0.00    |
| 661 | EF-hand domain-containing protein D2 EFHD2                                | Q96C19 | 27  | 25  | 19  | 29  | 25  | 0.76    | 1.16    | 1.00    |
| 662 | EGF domain-specific O-linked N-acetylglucosamine transferase EOGT         | Q5NDL2 | 62  | 2   | 0   | 2   | 2   | 0.00    | 1.00    | 1.00    |
| 663 | EH domain-containing protein 1 EHD1                                       | Q9H4M9 | 61  | 28  | 27  | 21  | 20  | 0.96    | 0.75    | 0.71    |
| 664 | EH domain-containing protein 2 EHD2                                       | Q9NZN4 | 61  | 12  | 19  | 10  | 12  | 1.58    | 0.83    | 1.00    |
| 665 | EH domain-containing protein 4 EHD4                                       | Q9H223 | 61  | 11  | 7   | 12  | 6   | 0.64    | 1.09    | 0.55    |
| 666 | ELAV-like protein 1 ELAVL1                                                | Q15717 | 36  | 6   | 14  | 11  | 8   | 2.33    | 1.83    | 1.33    |
| 667 | Electron transfer flavoprotein subunit alpha, mitochondrial ETFA          | P13804 | 35  | 13  | 13  | 13  | 10  | 1.00    | 1.00    | 0.77    |
| 668 | Electron transfer flavoprotein subunit beta ETFB                          | P38117 | 28  | 20  | 24  | 19  | 18  | 1.20    | 0.95    | 0.90    |
| 669 | ELKS/Rab6-interacting/CAST family member 1 ERC1                           | Q8IU02 | 128 | 0   | 7   | 9   | 7   | #DIV/0! | #DIV/0! | #DIV/0! |
| 670 | Elongation factor 1-alpha 1 EEF1A1                                        | P68104 | 50  | 314 | 325 | 325 | 363 | 1.04    | 1.04    | 1.16    |
| 671 | Elongation factor 1-beta EEF1B2                                           | P24534 | 25  | 10  | 7   | 7   | 4   | 0.70    | 0.70    | 0.40    |
| 672 | Elongation factor 1-delta EEF1D                                           | P29692 | 31  | 46  | 40  | 39  | 40  | 0.87    | 0.85    | 0.87    |
| 673 | Elongation factor 1-gamma EEF1G                                           | P26641 | 50  | 81  | 83  | 88  | 99  | 1.02    | 1.09    | 1.22    |
| 674 | Elongation factor 2 EEF2                                                  | P13639 | 95  | 378 | 339 | 392 | 363 | 0.90    | 1.04    | 0.96    |
| 675 | Elongation factor G, mitochondrial GFM1                                   | Q96R99 | 83  | 4   | 0   | 0   | 0   | 0.00    | 0.00    | 0.00    |
| 676 | Elongation factor Ts, mitochondrial TSFM                                  | P43897 | 35  | 5   | 0   | 3   | 2   | 0.00    | 0.60    | 0.40    |
| 677 | Elongation factor Tu GTP-binding domain-containing protein 1 EFTUD1       | Q72222 | 125 | 0   | 3   | 9   | 6   | #DIV/0! | #DIV/0! | #DIV/0! |
| 678 | Elongation factor Tu, mitochondrial TUFM                                  | P49411 | 50  | 36  | 44  | 28  | 34  | 1.22    | 0.78    | 0.94    |
| 679 | Elongator complex protein 1 IKBKAP                                        | Q95163 | 150 | 3   | 3   | 4   | 3   | 1.00    | 1.33    | 1.00    |
| 680 | Emerin EMD                                                                | P50402 | 29  | 4   | 4   | 2   | 2   | 1.00    | 0.50    | 0.50    |
| 681 | Endonuclease G, mitochondrial ENDOG                                       | Q14249 | 33  | 2   | 0   | 0   | 0   | 0.00    | 0.00    | 0.00    |
| 682 | Endophilin-A2 SH3GL1                                                      | Q99961 | 41  | 9   | 10  | 5   | 7   | 1.11    | 0.56    | 0.78    |
| 683 | Endophilin-B1 SH3GLB1                                                     | Q9Y371 | 41  | 5   | 6   | 9   | 11  | 1.20    | 1.80    | 2.20    |
| 684 | Endoplasmic reticulum aminopeptidase 1 ERAP1                              | Q9NZ08 | 107 | 3   | 4   | 5   | 8   | 1.33    | 1.67    | 2.67    |
| 685 | Endoplasmic reticulum resident protein 29 ERP29                           | P30040 | 29  | 23  | 26  | 25  | 27  | 1.13    | 1.09    | 1.17    |
| 686 | Endoplasmic reticulum resident protein 44 ERP44                           | Q9B526 | 47  | 20  | 23  | 28  | 23  | 1.15    | 1.40    | 1.15    |
| 687 | Endoplasmic reticulum-Golgi intermediate compartment protein 1 ERGIC1     | Q969X5 | 33  | 5   | 4   | 4   | 2   | 0.80    | 0.80    | 0.40    |
| 688 | Endoplasmic HSP90B1                                                       | P14625 | 92  | 243 | 189 | 181 | 186 | 0.78    | 0.74    | 0.77    |
| 689 | Enhancer of mRNA-decapping protein 4 EDC4                                 | Q6P2E9 | 152 | 0   | 4   | 6   | 3   | #DIV/0! | #DIV/0! | #DIV/0! |
| 690 | Enhancer of rudimentary homolog ERH                                       | P84090 | 12  | 7   | 3   | 3   | 0   | 0.43    | 0.43    | 0.00    |
| 691 | Enolase-phosphatase E1 ENOPH1                                             | Q9UJH7 | 29  | 13  | 7   | 6   | 14  | 0.54    | 0.46    | 1.08    |
| 692 | Enoyl-CoA delta isomerase 1, mitochondrial EC1                            | P42126 | 33  | 15  | 16  | 16  | 10  | 1.07    | 1.07    | 0.67    |
| 693 | Enoyl-CoA hydratase, mitochondrial ECHS1                                  | P30084 | 31  | 15  | 18  | 19  | 26  | 1.20    | 1.27    | 1.73    |
| 694 | Envoplakin EVPL                                                           | Q92817 | 232 | 18  | 7   | 13  | 17  | 0.39    | 0.72    | 0.94    |
| 695 | Ephrin type-A receptor 2 EPHA2                                            | P29317 | 108 | 3   | 5   | 2   | 0   | 1.67    | 0.67    | 0.00    |
| 696 | Ephrin-B1 EFNB1                                                           | P98172 | 38  | 3   | 2   | 0   | 0   | 0.67    | 0.00    | 0.00    |
| 697 | Epidermal growth factor receptor EGFR                                     | P00533 | 134 | 25  | 22  | 27  | 18  | 0.88    | 1.08    | 0.72    |
| 698 | Epidermal growth factor receptor kinase substrate 8-like protein 2 EPS8L2 | Q9H653 | 81  | 20  | 17  | 21  | 16  | 0.85    | 1.05    | 0.80    |
| 699 | Epidermal growth factor receptor substrate 15 EPS15                       | P42566 | 99  | 0   | 0   | 2   | 0   | #DIV/0! | #DIV/0! | #DIV/0! |
| 700 | Epididymal secretory protein E1 NPC2                                      | P61916 | 17  | 9   | 13  | 5   | 8   | 1.44    | 0.56    | 0.89    |
| 701 | Epiplakin EPPK1                                                           | P58107 | 556 | 549 | 599 | 565 | 650 | 1.09    | 1.03    | 1.18    |
| 702 | Epithelial splicing regulatory protein 1 ESRP1                            | Q6NXG1 | 76  | 0   | 0   | 0   | 2   | #DIV/0! | #DIV/0! | #DIV/0! |
| 703 | Epsin-3 EPN3                                                              | Q9H201 | 68  | 0   | 0   | 0   | 3   | #DIV/0! | #DIV/0! | #DIV/0! |
| 704 | ER lumen protein-retaining receptor 1 KDELR1                              | P24390 | 25  | 0   | 0   | 2   | 0   | #DIV/0! | #DIV/0! | #DIV/0! |
| 705 | ER membrane protein complex subunit 1 EMC1                                | Q8N766 | 112 | 4   | 0   | 2   | 2   | 0.00    | 0.50    | 0.50    |
| 706 | ER membrane protein complex subunit 3 EMC3                                | Q9P012 | 30  | 0   | 3   | 2   | 3   | #DIV/0! | #DIV/0! | #DIV/0! |
| 707 | ER membrane protein complex subunit 4 EMC4                                | Q5J8M3 | 20  | 2   | 0   | 2   | 0   | 0.00    | 1.00    | 0.00    |
| 708 | Erlin-2 ERLIN2                                                            | O94905 | 38  | 3   | 5   | 2   | 0   | 1.67    | 0.67    | 0.00    |
| 709 | ERO1-like protein alpha ERO1L                                             | Q96HE7 | 54  | 74  | 47  | 53  | 47  | 0.64    | 0.72    | 0.64    |
| 710 | Erythrocyte band 7 integral membrane protein STOM                         | P27105 | 32  | 28  | 27  | 22  | 38  | 0.96    | 0.79    | 1.36    |
| 711 | ES1 protein homolog, mitochondrial C21orf33                               | P30042 | 28  | 3   | 4   | 4   | 2   | 1.33    | 1.33    | 0.67    |
| 712 | Ester hydrolase C11orf54 C11orf54                                         | Q9H0W9 | 35  | 0   | 0   | 5   | 3   | #DIV/0! | #DIV/0! | #DIV/0! |
| 713 | Estradiol 17-beta-dehydrogenase 12 HSD17B12                               | Q53GQ0 | 34  | 32  | 32  | 21  | 40  | 1.00    | 0.66    | 1.25    |
| 714 | Ethanolamine-phosphate cytidyltransferase PCYT2                           | Q99447 | 44  | 0   | 0   | 2   | 0   | #DIV/0! | #DIV/0! | #DIV/0! |
| 715 | Ethylmalonyl-CoA decarboxylase ECHDC1                                     | Q9NTX5 | 34  | 5   | 0   | 4   | 2   | 0.00    | 0.80    | 0.40    |
| 716 | Eukaryotic initiation factor 4A-I EIF4A1                                  | P60842 | 46  | 138 | 148 | 165 | 158 | 1.07    | 1.20    | 1.14    |
| 717 | Eukaryotic initiation factor 4A-III EIF4A3                                | P38919 | 47  | 0   | 11  | 12  | 15  | #DIV/0! | #DIV/0! | #DIV/0! |
| 718 | Eukaryotic peptide chain release factor GTP-binding subunit ERF3A GSPT1   | P15170 | 56  | 10  | 21  | 28  | 28  | 2.10    | 2.80    | 2.80    |
| 719 | Eukaryotic peptide chain release factor subunit 1 ETF1                    | P62495 | 49  | 9   | 6   | 8   | 9   | 0.67    | 0.89    | 1.00    |
| 720 | Eukaryotic translation elongation factor 1 epsilon-1 EEF1E1               | O43324 | 20  | 18  | 13  | 15  | 14  | 0.72    | 0.83    | 0.78    |
| 721 | Eukaryotic translation initiation factor 1 EIF1                           | P41567 | 13  | 7   | 7   | 7   | 9   | 1.00    | 1.00    | 1.29    |
| 722 | Eukaryotic translation initiation factor 1A, X-chromosomal EIF1AX         | P47813 | 16  | 21  | 20  | 21  | 15  | 0.95    | 1.00    | 0.71    |
| 723 | Eukaryotic translation initiation factor 2 subunit 1 EIF2S1               | P05198 | 36  | 31  | 25  | 24  | 24  | 0.81    | 0.77    | 0.77    |
| 724 | Eukaryotic translation initiation factor 2 subunit 2 EIF2S2               | P20042 | 38  | 7   | 8   | 12  | 12  | 1.14    | 1.71    | 1.71    |
| 725 | Eukaryotic translation initiation factor 2 subunit 3 EIF2S3               | P41091 | 51  | 19  | 18  | 27  | 23  | 0.95    | 1.42    | 1.21    |
| 726 | Eukaryotic translation initiation factor 3 subunit A EIF3A                | Q14152 | 167 | 93  | 85  | 92  | 87  | 0.91    | 0.99    | 0.94    |
| 727 | Eukaryotic translation initiation factor 3 subunit B EIF3B                | P55884 | 92  | 52  | 50  | 46  | 50  | 0.96    | 0.88    | 0.96    |
| 728 | Eukaryotic translation initiation factor 3 subunit C EIF3C                | Q99613 | 105 | 46  | 66  | 52  | 50  | 1.43    | 1.13    | 1.09    |
| 729 | Eukaryotic translation initiation factor 3 subunit D EIF3D                | O15371 | 64  | 20  | 22  | 22  | 19  | 1.10    | 1.10    | 0.95    |
| 730 | Eukaryotic translation initiation factor 3 subunit E EIF3E                | P60228 | 52  | 40  | 31  | 33  | 32  | 0.78    | 0.83    | 0.80    |
| 731 | Eukaryotic translation initiation factor 3 subunit F EIF3F                | O00303 | 38  | 21  | 24  | 20  | 21  | 1.14    | 0.95    | 1.00    |
| 732 | Eukaryotic translation initiation factor 3 subunit G EIF3G                | O75821 | 36  | 10  | 9   | 11  | 14  | 0.90    | 1.10    | 1.40    |
| 733 | Eukaryotic translation initiation factor 3 subunit H EIF3H                | O15372 | 40  | 20  | 21  | 15  | 21  | 1.05    | 0.75    | 1.05    |
| 734 | Eukaryotic translation initiation factor 3 subunit I EIF3I                | Q13347 | 37  | 29  | 25  | 25  | 26  | 0.86    | 0.86    | 0.90    |
| 735 | Eukaryotic translation initiation factor 3 subunit J EIF3J                | O75822 | 29  | 4   | 7   | 7   | 8   | 1.75    | 1.75    | 2.00    |

|     |                                                                      |        |     |     |     |     |     |         |         |         |
|-----|----------------------------------------------------------------------|--------|-----|-----|-----|-----|-----|---------|---------|---------|
| 736 | Eukaryotic translation initiation factor 3 subunit K EIF3K           | Q9UBQ5 | 25  | 15  | 14  | 16  | 15  | 0.93    | 1.07    | 1.00    |
| 737 | Eukaryotic translation initiation factor 3 subunit L EIF3L           | Q9Y262 | 67  | 28  | 27  | 23  | 22  | 0.96    | 0.82    | 0.79    |
| 738 | Eukaryotic translation initiation factor 3 subunit M EIF3M           | Q7L2H7 | 43  | 34  | 33  | 36  | 22  | 0.97    | 1.06    | 0.65    |
| 739 | Eukaryotic translation initiation factor 4 gamma 1 EIF4G1            | Q04637 | 175 | 96  | 97  | 94  | 99  | 1.01    | 0.98    | 1.03    |
| 740 | Eukaryotic translation initiation factor 4 gamma 2 EIF4G2            | P78344 | 102 | 12  | 18  | 15  | 18  | 1.50    | 1.25    | 1.50    |
| 741 | Eukaryotic translation initiation factor 4B EIF4B                    | P23588 | 69  | 7   | 9   | 9   | 8   | 1.29    | 1.29    | 1.14    |
| 742 | Eukaryotic translation initiation factor 4E EIF4E                    | P06730 | 25  | 8   | 6   | 5   | 11  | 0.75    | 0.63    | 1.38    |
| 743 | Eukaryotic translation initiation factor 4H EIF4H                    | Q15056 | 27  | 11  | 16  | 19  | 22  | 1.45    | 1.73    | 2.00    |
| 744 | Eukaryotic translation initiation factor 5 EIF5                      | P55010 | 49  | 11  | 10  | 9   | 6   | 0.91    | 0.82    | 0.55    |
| 745 | Eukaryotic translation initiation factor 5A-1 EIF5A                  | P63241 | 17  | 64  | 58  | 61  | 69  | 0.91    | 0.95    | 1.08    |
| 746 | Eukaryotic translation initiation factor 5B EIF5B                    | O60841 | 139 | 22  | 35  | 39  | 24  | 1.59    | 1.77    | 1.09    |
| 747 | Eukaryotic translation initiation factor 6 EIF6                      | P56537 | 27  | 36  | 32  | 31  | 42  | 0.89    | 0.86    | 1.17    |
| 748 | Exocyst complex component 2 EXOC2                                    | Q96KP1 | 104 | 0   | 3   | 0   | 0   | #DIV/0! | #DIV/0! | #DIV/0! |
| 749 | Exocyst complex component 6B EXOC6B                                  | Q9Y2D4 | 94  | 3   | 0   | 0   | 3   | 0.00    | 0.00    | 1.00    |
| 750 | Exocyst complex component 7 EXOC7                                    | Q9UPT5 | 83  | 0   | 0   | 5   | 4   | #DIV/0! | #DIV/0! | #DIV/0! |
| 751 | Exosome complex component MTR3 EXOSC6                                | Q5RKV6 | 28  | 0   | 3   | 3   | 0   | #DIV/0! | #DIV/0! | #DIV/0! |
| 752 | Exosome complex component RRP4 EXOSC2                                | Q13868 | 33  | 3   | 2   | 0   | 0   | 0.67    | 0.00    | 0.00    |
| 753 | Exosome complex component RRP41 EXOSC4                               | Q9NPD3 | 26  | 0   | 4   | 2   | 3   | #DIV/0! | #DIV/0! | #DIV/0! |
| 754 | Exportin-1 XPO1                                                      | O14980 | 123 | 63  | 61  | 47  | 50  | 0.97    | 0.75    | 0.79    |
| 755 | Exportin-2 CSE1L                                                     | P55060 | 110 | 80  | 60  | 68  | 58  | 0.75    | 0.85    | 0.73    |
| 756 | Exportin-4 XPO4                                                      | Q9COE2 | 130 | 0   | 2   | 0   | 2   | #DIV/0! | #DIV/0! | #DIV/0! |
| 757 | Exportin-5 XPO5                                                      | Q9HAV4 | 136 | 4   | 5   | 6   | 8   | 1.25    | 1.50    | 2.00    |
| 758 | Exportin-7 XPO7                                                      | Q9UIA9 | 124 | 8   | 7   | 3   | 6   | 0.88    | 0.38    | 0.75    |
| 759 | Exportin-T XPO7                                                      | O43592 | 110 | 15  | 10  | 13  | 17  | 0.67    | 0.87    | 1.13    |
| 760 | Extended synaptotagmin-1 ESYT1                                       | Q9BSJ8 | 123 | 65  | 77  | 90  | 86  | 1.18    | 1.38    | 1.32    |
| 761 | Extended synaptotagmin-2 ESYT2                                       | A0FGF8 | 102 | 2   | 0   | 3   | 5   | 0.00    | 1.50    | 2.50    |
| 762 | Ezrin EZR                                                            | P15311 | 69  | 139 | 128 | 116 | 100 | 0.92    | 0.83    | 0.72    |
| 763 | FACT complex subunit SPT16 SUPT16H                                   | Q9Y5B9 | 120 | 9   | 10  | 6   | 8   | 1.11    | 0.67    | 0.89    |
| 764 | FACT complex subunit SSRP1 SSRP1                                     | Q08945 | 81  | 12  | 10  | 11  | 9   | 0.83    | 0.92    | 0.75    |
| 765 | F-actin-capping protein subunit alpha-1 CAPZA1                       | P52907 | 33  | 45  | 39  | 37  | 34  | 0.87    | 0.82    | 0.76    |
| 766 | F-actin-capping protein subunit alpha-2 CAPZA2                       | P47755 | 33  | 32  | 30  | 29  | 30  | 0.94    | 0.91    | 0.94    |
| 767 | F-actin-capping protein subunit beta CAPZB                           | P47756 | 31  | 48  | 50  | 59  | 67  | 1.04    | 1.23    | 1.40    |
| 768 | Far upstream element-binding protein 1 FUBP1                         | Q96AE4 | 68  | 9   | 11  | 17  | 19  | 1.22    | 1.89    | 2.11    |
| 769 | Far upstream element-binding protein 2 KHSP                          | Q92945 | 73  | 10  | 10  | 14  | 14  | 1.00    | 1.40    | 1.40    |
| 770 | Far upstream element-binding protein 3 FUBP3                         | Q96I24 | 62  | 0   | 0   | 4   | 0   | #DIV/0! | #DIV/0! | #DIV/0! |
| 771 | Farnesyl pyrophosphate synthase FDP5                                 | P14324 | 48  | 23  | 23  | 18  | 21  | 1.00    | 0.78    | 0.91    |
| 772 | FAS-associated factor 2 FAF2                                         | Q96CS3 | 53  | 5   | 7   | 8   | 6   | 1.40    | 1.60    | 1.20    |
| 773 | Fascin FSCN1                                                         | Q16658 | 55  | 111 | 99  | 130 | 125 | 0.89    | 1.17    | 1.13    |
| 774 | Fatty acid desaturase 2 FADS2                                        | Q95864 | 52  | 4   | 6   | 0   | 3   | 1.50    | 0.00    | 0.75    |
| 775 | Fatty acid synthase FASN                                             | P49327 | 273 | 473 | 469 | 543 | 463 | 0.99    | 1.15    | 0.98    |
| 776 | Fatty acid-binding protein, epidermal FABP5                          | Q01469 | 15  | 51  | 45  | 59  | 45  | 0.88    | 1.16    | 0.88    |
| 777 | Fatty aldehyde dehydrogenase ALDH3A2                                 | P51648 | 55  | 4   | 0   | 5   | 5   | 0.00    | 1.25    | 1.25    |
| 778 | F-box only protein 2 FBXO2                                           | Q9UJK2 | 33  | 9   | 6   | 11  | 13  | 0.67    | 1.22    | 1.44    |
| 779 | F-box only protein 50 NCCRP1                                         | Q6ZVX7 | 31  | 3   | 0   | 2   | 3   | 0.00    | 0.67    | 1.00    |
| 780 | Fermitin family homolog 1 FERMT1                                     | Q9BQL6 | 77  | 7   | 15  | 13  | 21  | 2.14    | 1.86    | 3.00    |
| 781 | Ferritin heavy chain FTH1                                            | P02794 | 21  | 18  | 21  | 16  | 13  | 1.17    | 0.89    | 0.72    |
| 782 | Ferritin light chain FTL                                             | P02792 | 20  | 12  | 12  | 11  | 11  | 1.00    | 0.92    | 0.92    |
| 783 | FH1/FH2 domain-containing protein 1 FHOD1                            | Q9Y613 | 127 | 0   | 0   | 2   | 2   | #DIV/0! | #DIV/0! | #DIV/0! |
| 784 | Fibronectin FN1                                                      | P02751 | 263 | 83  | 83  | 98  | 65  | 1.00    | 1.18    | 0.78    |
| 785 | Filaggrin FLG                                                        | P20930 | 435 | 0   | 3   | 0   | 0   | #DIV/0! | #DIV/0! | #DIV/0! |
| 786 | Filaggrin-2 FLG2                                                     | Q5D862 | 248 | 2   | 3   | 0   | 0   | 1.50    | 0.00    | 0.00    |
| 787 | Filamin-A FLNA                                                       | P21333 | 281 | 793 | 625 | 652 | 597 | 0.79    | 0.82    | 0.75    |
| 788 | Filamin-B FLNB                                                       | O75369 | 278 | 915 | 700 | 741 | 693 | 0.77    | 0.81    | 0.76    |
| 789 | Filamin-binding LIM protein 1 FBLIM1                                 | Q8WUP2 | 41  | 6   | 7   | 8   | 7   | 1.17    | 1.33    | 1.17    |
| 790 | FK506-binding protein 15 FKBP15                                      | Q5T1M5 | 134 | 0   | 0   | 3   | 4   | #DIV/0! | #DIV/0! | #DIV/0! |
| 791 | Flavin reductase (NADPH) BLVRB                                       | P30043 | 22  | 49  | 58  | 48  | 48  | 1.18    | 0.98    | 0.98    |
| 792 | Focal adhesion kinase 1 PTK2                                         | Q05397 | 119 | 3   | 0   | 0   | 3   | 0.00    | 0.00    | 1.00    |
| 793 | Four and a half LIM domains protein 1 FHL1                           | Q13642 | 36  | 4   | 5   | 0   | 0   | 1.25    | 0.00    | 0.00    |
| 794 | Four and a half LIM domains protein 2 FHL2                           | Q14192 | 32  | 22  | 16  | 26  | 19  | 0.73    | 1.18    | 0.86    |
| 795 | Fragile X mental retardation syndrome-related protein 1 FXR1         | P51114 | 70  | 0   | 3   | 2   | 2   | #DIV/0! | #DIV/0! | #DIV/0! |
| 796 | Fructose-2,6-bisphosphatase TIGAR TIGAR                              | Q9NQ88 | 30  | 12  | 14  | 18  | 15  | 1.17    | 1.50    | 1.25    |
| 797 | Fructose-bisphosphate aldolase A ALDOA                               | P04075 | 39  | 158 | 150 | 178 | 153 | 0.95    | 1.13    | 0.97    |
| 798 | Fructose-bisphosphate aldolase C ALDOC                               | P09972 | 39  | 14  | 19  | 17  | 14  | 1.36    | 1.21    | 1.00    |
| 799 | Fumarate hydratase, mitochondrial FH                                 | P07954 | 55  | 13  | 17  | 16  | 11  | 1.31    | 1.23    | 0.85    |
| 800 | Fumarylacetoacetase FAH                                              | P16930 | 46  | 0   | 0   | 0   | 2   | #DIV/0! | #DIV/0! | #DIV/0! |
| 801 | Galectin-1 LGALS1                                                    | P09382 | 15  | 104 | 111 | 99  | 97  | 1.07    | 0.95    | 0.93    |
| 802 | Galectin-3 LGALS3                                                    | P17931 | 26  | 14  | 19  | 24  | 28  | 1.36    | 1.71    | 2.00    |
| 803 | Galectin-3-binding protein LGALS3BP                                  | Q08380 | 65  | 0   | 3   | 3   | 0   | #DIV/0! | #DIV/0! | #DIV/0! |
| 804 | Galectin-7 LGALS7                                                    | P47929 | 15  | 89  | 78  | 79  | 74  | 0.88    | 0.89    | 0.83    |
| 805 | Gamma-aminobutyric acid receptor-associated protein-like 2 GABARAPL2 | P60520 | 14  | 0   | 0   | 4   | 4   | #DIV/0! | #DIV/0! | #DIV/0! |
| 806 | Gamma-glutamyl hydrolase GGH                                         | Q92820 | 36  | 2   | 5   | 5   | 5   | 2.50    | 2.50    | 2.50    |
| 807 | Gamma-glutamylaminocyclotransferase GGACT                            | Q9BVM4 | 17  | 0   | 0   | 0   | 2   | #DIV/0! | #DIV/0! | #DIV/0! |
| 808 | Gamma-glutamylcyclotransferase GGCT                                  | O75223 | 21  | 10  | 8   | 5   | 4   | 0.80    | 0.50    | 0.40    |
| 809 | Gamma-synuclein SNCG                                                 | O76070 | 13  | 2   | 0   | 0   | 0   | 0.00    | 0.00    | 0.00    |
| 810 | Ganglioside GM2 activator GM2A                                       | P17900 | 21  | 10  | 7   | 10  | 10  | 0.70    | 1.00    | 1.00    |
| 811 | GDP-fucose protein O-fucosyltransferase 1 POFUT1                     | Q9H488 | 44  | 0   | 3   | 3   | 4   | #DIV/0! | #DIV/0! | #DIV/0! |
| 812 | Gelsolin GSN                                                         | P06396 | 86  | 56  | 66  | 61  | 71  | 1.18    | 1.09    | 1.27    |
| 813 | Gem-associated protein 5 GEMIN5                                      | Q8TEQ6 | 169 | 0   | 0   | 0   | 2   | #DIV/0! | #DIV/0! | #DIV/0! |
| 814 | General vesicular transport factor p115 USO1                         | O60763 | 108 | 39  | 41  | 39  | 36  | 1.05    | 1.00    | 0.92    |
| 815 | Geranylgeranyl transferase type-2 subunit alpha RABGGTA              | Q92696 | 65  | 0   | 2   | 0   | 3   | #DIV/0! | #DIV/0! | #DIV/0! |
| 816 | Geranylgeranyl transferase type-2 subunit beta RABGGTB               | P53611 | 37  | 0   | 0   | 5   | 2   | #DIV/0! | #DIV/0! | #DIV/0! |
| 817 | Glia maturation factor beta GMFB                                     | P60983 | 17  | 13  | 9   | 10  | 9   | 0.69    | 0.77    | 0.69    |

|     |                                                                                 |             |     |     |     |     |     |         |         |         |
|-----|---------------------------------------------------------------------------------|-------------|-----|-----|-----|-----|-----|---------|---------|---------|
| 818 | Glucosamine 6-phosphate N-acetyltransferase GNPAT1                              | Q96FK6      | 21  | 9   | 10  | 10  | 16  | 1.11    | 1.11    | 1.78    |
| 819 | Glucosamine 6-phosphate isomerase 1 GNPDA1                                      | P46926      | 33  | 6   | 9   | 8   | 6   | 1.50    | 1.33    | 1.00    |
| 820 | Glucosamine 6-phosphate isomerase 2 GNPDA2                                      | Q8TDQ7      | 31  | 0   | 5   | 0   | 0   | #DIV/0! | #DIV/0! | #DIV/0! |
| 821 | Glucose 6-phosphate 1-dehydrogenase G6PD                                        | P11413      | 59  | 83  | 54  | 55  | 58  | 0.65    | 0.66    | 0.70    |
| 822 | Glucose 6-phosphate isomerase GPI                                               | P06744      | 63  | 82  | 77  | 65  | 58  | 0.94    | 0.79    | 0.71    |
| 823 | Glucosidase 2 subunit beta PRKCSH                                               | P14314      | 59  | 22  | 23  | 20  | 23  | 1.05    | 0.91    | 1.05    |
| 824 | Glucosylceramidase GBA                                                          | P04062      | 60  | 2   | 3   | 9   | 5   | 1.50    | 4.50    | 2.50    |
| 825 | Glutamate dehydrogenase 1, mitochondrial GLUD1                                  | P00367      | 61  | 14  | 19  | 18  | 15  | 1.36    | 1.29    | 1.07    |
| 826 | Glutamate-cysteine ligase catalytic subunit GCLC                                | P48506      | 73  | 10  | 19  | 18  | 24  | 1.90    | 1.80    | 2.40    |
| 827 | Glutamate-cysteine ligase regulatory subunit GCLM                               | P48507      | 31  | 9   | 6   | 3   | 6   | 0.67    | 0.33    | 0.67    |
| 828 | Glutamate-rich WD repeat-containing protein 1 GRWD1                             | Q9BQ67      | 49  | 4   | 4   | 4   | 4   | 1.00    | 1.00    | 1.00    |
| 829 | Glutaminase kidney isoform, mitochondrial GLS                                   | O94925      | 73  | 14  | 10  | 12  | 15  | 0.71    | 0.86    | 1.07    |
| 830 | Glutamine-dependent NAD(+) synthetase NADSYN1                                   | Q6IA69      | 79  | 0   | 3   | 0   | 0   | #DIV/0! | #DIV/0! | #DIV/0! |
| 831 | Glutamine-fructose-6-phosphate aminotransferase [isomerizing] 1 GFPT1           | Q06210      | 79  | 33  | 27  | 39  | 44  | 0.82    | 1.18    | 1.33    |
| 832 | Glutamine-rich protein 1 QRICH1                                                 | Q2TAL8      | 86  | 0   | 2   | 0   | 0   | #DIV/0! | #DIV/0! | #DIV/0! |
| 833 | Glutamine-tRNA ligase QARS                                                      | P47897      | 88  | 55  | 38  | 47  | 41  | 0.69    | 0.85    | 0.75    |
| 834 | Glutaredoxin-1 GLRX                                                             | P35754      | 12  | 7   | 7   | 8   | 0   | 1.00    | 1.14    | 0.00    |
| 835 | Glutaredoxin-3 GLRX3                                                            | O76003      | 37  | 36  | 34  | 38  | 39  | 0.94    | 1.06    | 1.08    |
| 836 | Glutathione peroxidase 1 GPX1                                                   | P07203      | 22  | 25  | 15  | 24  | 20  | 0.60    | 0.96    | 0.80    |
| 837 | Glutathione reductase, mitochondrial GSR                                        | P00390      | 56  | 4   | 4   | 7   | 5   | 1.00    | 1.75    | 1.25    |
| 838 | Glutathione S-transferase kappa 1 GSTK1                                         | O9Y2Q3      | 25  | 21  | 27  | 23  | 18  | 1.29    | 1.10    | 0.86    |
| 839 | Glutathione S-transferase omega-1 GSTO1                                         | P78417      | 28  | 43  | 38  | 38  | 51  | 0.88    | 0.88    | 1.19    |
| 840 | Glutathione S-transferase P GSTP1                                               | P09211      | 23  | 220 | 237 | 231 | 189 | 1.08    | 1.05    | 0.86    |
| 841 | Glutathione S-transferase theta-1 GSTT1                                         | P30711      | 27  | 0   | 2   | 0   | 0   | #DIV/0! | #DIV/0! | #DIV/0! |
| 842 | Glutathione synthetase GSS                                                      | P48637      | 52  | 13  | 19  | 17  | 15  | 1.46    | 1.31    | 1.15    |
| 843 | Glyceraldehyde 3-phosphate dehydrogenase GAPDH                                  | P04406      | 36  | 407 | 574 | 497 | 474 | 1.41    | 1.22    | 1.16    |
| 844 | Glycerol 3-phosphate dehydrogenase, mitochondrial GPD2                          | P43304      | 81  | 8   | 13  | 17  | 17  | 1.63    | 2.13    | 2.13    |
| 845 | Glycine cleavage system H protein, mitochondrial GCSH                           | P23434      | 19  | 0   | 0   | 2   | 0   | #DIV/0! | #DIV/0! | #DIV/0! |
| 846 | Glycine-tRNA ligase GARS                                                        | P41250      | 83  | 79  | 79  | 72  | 60  | 1.00    | 0.91    | 0.76    |
| 847 | Glycogen [starch] synthase, muscle GYS1                                         | P13807      | 84  | 11  | 2   | 3   | 5   | 0.18    | 0.27    | 0.45    |
| 848 | Glycogen debranching enzyme AGL                                                 | P35573      | 175 | 5   | 7   | 13  | 10  | 1.40    | 2.60    | 2.00    |
| 849 | Glycogen phosphorylase, brain form PYGB                                         | P11216      | 97  | 100 | 70  | 79  | 72  | 0.70    | 0.79    | 0.72    |
| 850 | Glycogen phosphorylase, liver form PYGL                                         | P06737      | 97  | 63  | 55  | 62  | 60  | 0.87    | 0.98    | 0.95    |
| 851 | Glycogenin-1 GYG1                                                               | P46976      | 39  | 0   | 0   | 5   | 6   | #DIV/0! | #DIV/0! | #DIV/0! |
| 852 | Glycolipid transfer protein GLTP                                                | Q9NZD2      | 24  | 9   | 4   | 3   | 4   | 0.44    | 0.33    | 0.44    |
| 853 | Glycylpeptide N-tetradecanoyltransferase 1 NMT1                                 | P30419      | 57  | 2   | 0   | 5   | 0   | 0.00    | 2.50    | 0.00    |
| 854 | Glyoxalase domain-containing protein 4 GLOD4                                    | Q9HC38      | 35  | 15  | 17  | 18  | 13  | 1.13    | 1.20    | 0.87    |
| 855 | Glyoxylate reductase/hydroxyypyruvate reductase GRHPR                           | Q9UBQ7      | 36  | 7   | 8   | 11  | 7   | 1.14    | 1.57    | 1.00    |
| 856 | GMP synthase [glutamine-hydrolyzing] GMPS                                       | P49915      | 77  | 3   | 8   | 13  | 18  | 2.67    | 4.33    | 6.00    |
| 857 | Golgi apparatus protein 1 GLG1                                                  | Q92896      | 135 | 3   | 6   | 11  | 12  | 2.00    | 3.67    | 4.00    |
| 858 | Golgi phosphoprotein 3 GOLPH3                                                   | Q9H4A6      | 34  | 0   | 0   | 2   | 0   | #DIV/0! | #DIV/0! | #DIV/0! |
| 859 | Golgi reassembly-stacking protein 2 GORASP2                                     | Q9H8Y8      | 47  | 3   | 4   | 3   | 4   | 1.33    | 1.00    | 1.33    |
| 860 | Golgi resident protein GCP60 ACBD3                                              | Q9H3P7      | 61  | 10  | 12  | 18  | 14  | 1.20    | 1.80    | 1.40    |
| 861 | Golgi SNAP receptor complex member 1 GOSR1                                      | O95249      | 29  | 0   | 4   | 4   | 0   | #DIV/0! | #DIV/0! | #DIV/0! |
| 862 | Golgi SNAP receptor complex member 2 GOSR2                                      | O14653      | 25  | 0   | 4   | 0   | 0   | #DIV/0! | #DIV/0! | #DIV/0! |
| 863 | Golgi to ER traffic protein 4 homolog GET4                                      | Q7L5D6      | 37  | 2   | 2   | 0   | 0   | 1.00    | 0.00    | 0.00    |
| 864 | Golgi-associated PDZ and coiled-coil motif-containing protein GOPC              | Q9HD26      | 51  | 0   | 0   | 5   | 4   | #DIV/0! | #DIV/0! | #DIV/0! |
| 865 | Golgin subfamily A member 2 GOLGA2                                              | Q08379      | 113 | 5   | 2   | 7   | 7   | 0.40    | 1.40    | 1.40    |
| 866 | Golgin subfamily A member 3 GOLGA3                                              | Q08378      | 167 | 0   | 7   | 14  | 11  | #DIV/0! | #DIV/0! | #DIV/0! |
| 867 | Golgin subfamily A member 4 GOLGA4                                              | Q13439      | 261 | 0   | 0   | 4   | 4   | #DIV/0! | #DIV/0! | #DIV/0! |
| 868 | Golgin subfamily A member 7 GOLGA7                                              | Q7Z5G4      | 16  | 9   | 3   | 7   | 9   | 0.33    | 0.78    | 1.00    |
| 869 | Golgin subfamily B member 1 GOLGB1                                              | Q14789      | 376 | 10  | 35  | 36  | 41  | 3.50    | 3.60    | 4.10    |
| 870 | Golgi-specific brefeldin A-resistance guanine nucleotide exchange factor 1 GBF1 | Q92538      | 206 | 8   | 16  | 17  | 13  | 2.00    | 2.13    | 1.63    |
| 871 | GPN-loop GTPase 1 GPN1                                                          | Q9HCN4      | 42  | 0   | 0   | 0   | 3   | #DIV/0! | #DIV/0! | #DIV/0! |
| 872 | Growth factor receptor-bound protein 2 GRB2                                     | P62993      | 25  | 5   | 3   | 4   | 2   | 0.60    | 0.80    | 0.40    |
| 873 | GrpE protein homolog 1, mitochondrial GRPEL1                                    | Q9HAV7      | 24  | 9   | 11  | 13  | 8   | 1.22    | 1.44    | 0.89    |
| 874 | GTP:AMP phosphotransferase AK3, mitochondrial AK3                               | Q9UIJ7      | 26  | 14  | 16  | 11  | 11  | 1.14    | 0.79    | 0.79    |
| 875 | GTPase NRas NRAS                                                                | P01111      | 21  | 13  | 10  | 14  | 8   | 0.77    | 1.08    | 0.62    |
| 876 | GTPase-activating protein and VPS9 domain-containing protein 1 GAPVD1           | Q14C86      | 165 | 2   | 0   | 8   | 7   | 0.00    | 4.00    | 3.50    |
| 877 | GTP-binding nuclear protein Ran RAN                                             | P62826      | 24  | 77  | 79  | 91  | 94  | 1.03    | 1.18    | 1.22    |
| 878 | GTP-binding protein Rheb RHEB                                                   | Q15382      | 20  | 6   | 6   | 6   | 5   | 1.00    | 1.00    | 0.83    |
| 879 | GTP-binding protein SAR1a SAR1A                                                 | Q9NR31      | 22  | 20  | 13  | 13  | 18  | 0.65    | 0.65    | 0.90    |
| 880 | GTP-binding protein SAR1b SAR1B                                                 | Q9Y6B6      | 22  | 10  | 15  | 12  | 13  | 1.50    | 1.20    | 1.30    |
| 881 | Guanine nucleotide exchange factor VAV2 VAV2                                    | P52735      | 101 | 0   | 7   | 2   | 4   | #DIV/0! | #DIV/0! | #DIV/0! |
| 882 | Guanine nucleotide-binding protein G(i) subunit alpha-1 GNAI1                   | P63096      | 40  | 16  | 16  | 15  | 0   | 1.00    | 0.94    | 0.00    |
| 883 | Guanine nucleotide-binding protein G(i) subunit alpha-2 GNAI2                   | P04899      | 40  | 50  | 51  | 42  | 40  | 1.02    | 0.84    | 0.80    |
| 884 | Guanine nucleotide-binding protein G(i)/G(s)/G(o) subunit gamma-12 GNG12        | Q9UB16      | 8   | 13  | 15  | 8   | 9   | 1.15    | 0.62    | 0.69    |
| 885 | Guanine nucleotide-binding protein G(i)/G(s)/G(o) subunit gamma-5 GNG5          | P63218      | 7   | 11  | 11  | 13  | 5   | 1.00    | 1.18    | 0.45    |
| 886 | Guanine nucleotide-binding protein G(i)/G(s)/G(t) subunit beta-1 GNB1           | P62873      | 37  | 24  | 40  | 27  | 26  | 1.67    | 1.13    | 1.08    |
| 887 | Guanine nucleotide-binding protein G(i)/G(s)/G(t) subunit beta-2 GNB2           | P62879      | 37  | 28  | 24  | 22  | 19  | 0.86    | 0.79    | 0.68    |
| 888 | Guanine nucleotide-binding protein G(k) subunit alpha GNAI3                     | P08754      | 41  | 36  | 36  | 34  | 27  | 1.00    | 0.94    | 0.75    |
| 889 | Guanine nucleotide-binding protein G(q) subunit alpha GNAQ                      | P50148      | 42  | 5   | 3   | 3   | 0   | 0.60    | 0.60    | 0.00    |
| 890 | Guanine nucleotide-binding protein G(s) subunit alpha isoforms short GNAS       | P63092 (+1) | 46  | 5   | 8   | 7   | 2   | 1.60    | 1.40    | 0.40    |
| 891 | Guanine nucleotide-binding protein subunit alpha-11 GNA11                       | P29992      | 42  | 3   | 7   | 5   | 0   | 2.33    | 1.67    | 0.00    |
| 892 | Guanine nucleotide-binding protein subunit alpha-13 GNA13                       | Q14344      | 44  | 0   | 6   | 5   | 0   | #DIV/0! | #DIV/0! | #DIV/0! |
| 893 | Guanine nucleotide-binding protein subunit beta-2-like 1 GNB2L1                 | P63244      | 35  | 57  | 53  | 46  | 51  | 0.93    | 0.81    | 0.89    |
| 894 | Guanine nucleotide-binding protein-like 1 GNL1                                  | P36915      | 69  | 0   | 8   | 10  | 10  | #DIV/0! | #DIV/0! | #DIV/0! |
| 895 | Guanylate kinase GUK1                                                           | Q16774      | 22  | 6   | 0   | 2   | 0   | 0.00    | 0.33    | 0.00    |
| 896 | Guanylate-binding protein 6 GBP6                                                | Q62N66      | 72  | 0   | 0   | 2   | 3   | #DIV/0! | #DIV/0! | #DIV/0! |
| 897 | H/ACA ribonucleoprotein complex subunit 2 NHP2                                  | Q9NX24      | 17  | 0   | 2   | 2   | 0   | #DIV/0! | #DIV/0! | #DIV/0! |
| 898 | Haloacid dehalogenase-like hydrolase domain-containing protein 2 HDHD2          | Q9H0R4      | 29  | 0   | 4   | 3   | 4   | #DIV/0! | #DIV/0! | #DIV/0! |
| 899 | HEAT repeat-containing protein 2 HEATR2                                         | Q86Y56      | 94  | 2   | 0   | 0   | 2   | 0.00    | 0.00    | 1.00    |

|     |                                                                   |             |     |     |     |     |     |         |         |         |
|-----|-------------------------------------------------------------------|-------------|-----|-----|-----|-----|-----|---------|---------|---------|
| 900 | HEAT repeat-containing protein 3 HEATR3                           | Q7Z4Q2      | 75  | 0   | 0   | 3   | 3   | #DIV/0! | #DIV/0! | #DIV/0! |
| 901 | Heat shock 70 kDa protein 1A/1B HSPA1A                            | P08107      | 70  | 159 | 98  | 114 | 127 | 0.62    | 0.72    | 0.80    |
| 902 | Heat shock 70 kDa protein 4 HSPA4                                 | P34932      | 94  | 74  | 71  | 63  | 56  | 0.96    | 0.85    | 0.76    |
| 903 | Heat shock 70 kDa protein 4L HSPA4L                               | O95757      | 95  | 44  | 33  | 43  | 43  | 0.75    | 0.98    | 0.98    |
| 904 | Heat shock cognate 71 kDa protein HSPA8                           | P11142      | 71  | 302 | 246 | 258 | 239 | 0.81    | 0.85    | 0.79    |
| 905 | Heat shock protein 105 kDa HSPH1                                  | Q92598      | 97  | 64  | 51  | 66  | 54  | 0.80    | 1.03    | 0.84    |
| 906 | Heat shock protein 75 kDa, mitochondrial TRAP1                    | Q12931      | 80  | 30  | 15  | 19  | 21  | 0.50    | 0.63    | 0.70    |
| 907 | Heat shock protein beta-1 HSPB1                                   | P04792      | 23  | 129 | 108 | 113 | 134 | 0.84    | 0.88    | 1.04    |
| 908 | Heat shock protein HSP 90-alpha HSP90AA1                          | P07900      | 85  | 285 | 235 | 246 | 244 | 0.82    | 0.86    | 0.86    |
| 909 | Heat shock protein HSP 90-beta HSP90AB1                           | P08238      | 83  | 261 | 227 | 241 | 249 | 0.87    | 0.92    | 0.95    |
| 910 | Heat shock-related 70 kDa protein 2 HSPA2                         | P54652      | 70  | 0   | 33  | 0   | 0   | #DIV/0! | #DIV/0! | #DIV/0! |
| 911 | Hematological and neurological expressed 1 protein HN1            | Q9UK76      | 16  | 6   | 0   | 2   | 0   | 0.00    | 0.33    | 0.00    |
| 912 | Hematological and neurological expressed 1-like protein HN1L      | Q9H910      | 20  | 4   | 0   | 0   | 0   | 0.00    | 0.00    | 0.00    |
| 913 | Heme oxygenase 2 HMOX2                                            | P30519      | 36  | 22  | 14  | 16  | 15  | 0.64    | 0.73    | 0.68    |
| 914 | Heme-binding protein 1 HEBP1                                      | Q9NRV9      | 21  | 5   | 3   | 5   | 3   | 0.60    | 1.00    | 0.60    |
| 915 | Heme-binding protein 2 HEBP2                                      | Q9Y524      | 23  | 0   | 9   | 8   | 4   | #DIV/0! | #DIV/0! | #DIV/0! |
| 916 | Hemoglobin subunit alpha HBA1                                     | P69905      | 15  | 41  | 37  | 27  | 29  | 0.90    | 0.66    | 0.71    |
| 917 | Hemoglobin subunit beta HBB                                       | P68871      | 16  | 4   | 6   | 4   | 0   | 1.50    | 1.00    | 0.00    |
| 918 | Hepatocyte growth factor-regulated tyrosine kinase substrate HGS  | O14964      | 86  | 14  | 15  | 17  | 11  | 1.07    | 1.21    | 0.79    |
| 919 | Hepatoma-derived growth factor HDGF                               | P51858      | 27  | 12  | 11  | 11  | 6   | 0.92    | 0.92    | 0.50    |
| 920 | Heterogeneous nuclear ribonucleoprotein A/B HNRNPAB               | Q99729      | 36  | 6   | 12  | 9   | 12  | 2.00    | 1.50    | 2.00    |
| 921 | Heterogeneous nuclear ribonucleoprotein A0 HNRNPA0                | Q13151      | 31  | 3   | 5   | 6   | 8   | 1.67    | 2.00    | 2.67    |
| 922 | Heterogeneous nuclear ribonucleoprotein A1 HNRNPA1                | P09651      | 39  | 44  | 58  | 56  | 54  | 1.32    | 1.27    | 1.23    |
| 923 | Heterogeneous nuclear ribonucleoprotein A3 HNRNPA3                | P51991      | 40  | 6   | 6   | 8   | 14  | 1.00    | 1.33    | 2.33    |
| 924 | Heterogeneous nuclear ribonucleoprotein D0 HNRNPD                 | Q14103      | 38  | 25  | 26  | 30  | 24  | 1.04    | 1.20    | 0.96    |
| 925 | Heterogeneous nuclear ribonucleoprotein D-like HNRNPDL            | O14979      | 46  | 9   | 14  | 16  | 12  | 1.56    | 1.78    | 1.33    |
| 926 | Heterogeneous nuclear ribonucleoprotein F HNRNPF                  | P52597      | 46  | 36  | 28  | 30  | 32  | 0.78    | 0.83    | 0.89    |
| 927 | Heterogeneous nuclear ribonucleoprotein H HNRNPH1                 | P31943      | 49  | 21  | 21  | 23  | 38  | 1.00    | 1.10    | 1.81    |
| 928 | Heterogeneous nuclear ribonucleoprotein H2 HNRNPH2                | P55795      | 49  | 0   | 0   | 15  | 16  | #DIV/0! | #DIV/0! | #DIV/0! |
| 929 | Heterogeneous nuclear ribonucleoprotein H3 HNRNPH3                | P31942      | 37  | 2   | 7   | 6   | 8   | 3.50    | 3.00    | 4.00    |
| 930 | Heterogeneous nuclear ribonucleoprotein K HNRNPK                  | P61978      | 51  | 88  | 77  | 70  | 69  | 0.88    | 0.80    | 0.78    |
| 931 | Heterogeneous nuclear ribonucleoprotein L HNRNPL                  | P14866      | 64  | 5   | 14  | 21  | 22  | 2.80    | 4.20    | 4.40    |
| 932 | Heterogeneous nuclear ribonucleoprotein M HNRNPM                  | P52272      | 78  | 21  | 27  | 39  | 38  | 1.29    | 1.86    | 1.81    |
| 933 | Heterogeneous nuclear ribonucleoprotein Q SYNCRIP                 | O60506      | 70  | 35  | 35  | 41  | 40  | 1.00    | 1.17    | 1.14    |
| 934 | Heterogeneous nuclear ribonucleoprotein R HNRNPR                  | O43390      | 71  | 12  | 18  | 18  | 20  | 1.50    | 1.50    | 1.67    |
| 935 | Heterogeneous nuclear ribonucleoprotein U HNRNPU                  | Q00839      | 91  | 32  | 40  | 33  | 42  | 1.25    | 1.03    | 1.31    |
| 936 | Heterogeneous nuclear ribonucleoprotein U-like protein 1 HNRNPUL1 | Q9BUJ2      | 96  | 0   | 0   | 4   | 3   | #DIV/0! | #DIV/0! | #DIV/0! |
| 937 | Heterogeneous nuclear ribonucleoprotein U-like protein 2 HNRNPUL2 | Q1KMD3      | 85  | 10  | 9   | 15  | 16  | 0.90    | 1.50    | 1.60    |
| 938 | Heterogeneous nuclear ribonucleoproteins A2/B1 HNRNPA2B1          | P22626      | 37  | 35  | 40  | 56  | 57  | 1.14    | 1.60    | 1.63    |
| 939 | Heterogeneous nuclear ribonucleoproteins C1/C2 HNRNPC             | P07910      | 34  | 10  | 15  | 21  | 25  | 1.50    | 2.10    | 2.50    |
| 940 | Hexokinase-1 HK1                                                  | P19367      | 102 | 7   | 12  | 10  | 19  | 1.71    | 1.43    | 2.71    |
| 941 | High mobility group protein B1 HMGB1                              | P09429      | 25  | 29  | 18  | 21  | 30  | 0.62    | 0.72    | 1.03    |
| 942 | High mobility group protein B3 HMGB3                              | O15347      | 23  | 14  | 16  | 13  | 20  | 1.14    | 0.93    | 1.43    |
| 943 | High mobility group protein HMG-I/HMG-Y HMGA1                     | P17096      | 12  | 6   | 11  | 0   | 4   | 1.83    | 0.00    | 0.67    |
| 944 | Hippocalcin-like protein 1 HPCAL1                                 | P37235      | 22  | 0   | 3   | 4   | 0   | #DIV/0! | #DIV/0! | #DIV/0! |
| 945 | Histidine triad nucleotide-binding protein 1 HINT1                | P49773      | 14  | 27  | 16  | 21  | 26  | 0.59    | 0.78    | 0.96    |
| 946 | Histidine-tRNA ligase, cytoplasmic HARS                           | P12081      | 57  | 22  | 15  | 18  | 23  | 0.68    | 0.82    | 1.05    |
| 947 | Histone acetyltransferase type B catalytic subunit HAT1           | O14929      | 50  | 0   | 0   | 2   | 4   | #DIV/0! | #DIV/0! | #DIV/0! |
| 948 | Histone H1.2 HIST1H1C                                             | P16403      | 21  | 3   | 9   | 3   | 9   | 3.00    | 1.00    | 3.00    |
| 949 | Histone H1.5 HIST1H1B                                             | P16401      | 23  | 0   | 0   | 0   | 3   | #DIV/0! | #DIV/0! | #DIV/0! |
| 950 | Histone H2A type 2-C HIST2H2AC                                    | Q16777 (+1) | 14  | 4   | 4   | 5   | 8   | 1.00    | 1.25    | 2.00    |
| 951 | Histone H2B type 1-L HIST1H2BL                                    | Q99880      | 14  | 24  | 8   | 5   | 31  | 0.33    | 0.21    | 1.29    |
| 952 | Histone H4 HIST1H4A                                               | P62805      | 11  | 29  | 11  | 9   | 35  | 0.38    | 0.31    | 1.21    |
| 953 | Histone-binding protein RBBP4 RBBP4                               | Q09028      | 48  | 3   | 5   | 6   | 4   | 1.67    | 2.00    | 1.33    |
| 954 | Histone-binding protein RBBP7 RBBP7                               | Q16576      | 48  | 0   | 6   | 5   | 0   | #DIV/0! | #DIV/0! | #DIV/0! |
| 955 | Histone-lysine N-methyltransferase setd3 SETD3                    | Q86TU7      | 67  | 0   | 4   | 0   | 4   | #DIV/0! | #DIV/0! | #DIV/0! |
| 956 | HLA class I histocompatibility antigen, A-2 alpha chain HLA-A     | P01892 (+1) | 41  | 8   | 9   | 6   | 8   | 1.13    | 0.75    | 1.00    |
| 957 | HLA class I histocompatibility antigen, Cw-6 alpha chain HLA-C    | Q29963      | 41  | 0   | 11  | 0   | 0   | #DIV/0! | #DIV/0! | #DIV/0! |
| 958 | Homer protein homolog 3 HOMER3                                    | Q9NSC5      | 40  | 4   | 4   | 2   | 2   | 1.00    | 0.50    | 0.50    |
| 959 | Hornerin HRNR                                                     | Q86Y23      | 282 | 3   | 34  | 10  | 9   | 11.33   | 3.33    | 3.00    |
| 960 | Hsc70-interacting protein ST13                                    | P50502      | 41  | 28  | 24  | 22  | 14  | 0.86    | 0.79    | 0.50    |
| 961 | Hsp70-binding protein 1 HSPBP1                                    | Q9NZL4      | 39  | 6   | 3   | 10  | 5   | 0.50    | 1.67    | 0.83    |
| 962 | Hsp90 co-chaperone Cdc37 CDC37                                    | Q16543      | 44  | 13  | 17  | 13  | 17  | 1.31    | 1.00    | 1.31    |
| 963 | Huntingtin HTT                                                    | P42858      | 348 | 6   | 0   | 0   | 0   | 0.00    | 0.00    | 0.00    |
| 964 | Huntingtin-interacting protein 1-related protein HIP1R            | O75146      | 119 | 0   | 0   | 0   | 3   | #DIV/0! | #DIV/0! | #DIV/0! |
| 965 | Huntingtin-interacting protein K HYPK                             | Q9NX55      | 15  | 0   | 0   | 0   | 2   | #DIV/0! | #DIV/0! | #DIV/0! |
| 966 | Hydroxyacyl-coenzyme A dehydrogenase, mitochondrial HADH          | Q16836      | 34  | 14  | 11  | 12  | 10  | 0.79    | 0.86    | 0.71    |
| 967 | Hydroxyacylglutathione hydrolase, mitochondrial HAGH              | Q16775      | 34  | 3   | 5   | 5   | 0   | 1.67    | 1.67    | 0.00    |
| 968 | Hydroxymethylglutaryl-CoA lyase, mitochondrial HMGLCL             | P35914      | 34  | 2   | 0   | 4   | 0   | 0.00    | 2.00    | 0.00    |
| 969 | Hydroxymethylglutaryl-CoA synthase, cytoplasmic HMGCs1            | Q01581      | 57  | 38  | 25  | 17  | 16  | 0.66    | 0.45    | 0.42    |
| 970 | Hypoxanthine-guanine phosphoribosyltransferase HPRT1              | P00492      | 25  | 22  | 19  | 19  | 18  | 0.86    | 0.86    | 0.82    |
| 971 | Hypoxia up-regulated protein 1 HYOU1                              | Q9Y411      | 111 | 122 | 83  | 86  | 91  | 0.68    | 0.70    | 0.75    |
| 972 | Immunity-related GTPase family Q protein IRGQ                     | Q8WZA9      | 63  | 0   | 3   | 5   | 5   | #DIV/0! | #DIV/0! | #DIV/0! |
| 973 | Importin subunit alpha-1 KPNA2                                    | P52292      | 58  | 8   | 5   | 8   | 9   | 0.63    | 1.00    | 1.13    |
| 974 | Importin subunit alpha-3 KPNA4                                    | O00629      | 58  | 22  | 21  | 12  | 12  | 0.95    | 0.55    | 0.55    |
| 975 | Importin subunit alpha-4 KPNA3                                    | O00505      | 58  | 12  | 5   | 10  | 8   | 0.42    | 0.83    | 0.67    |
| 976 | Importin subunit alpha-5 KPNA1                                    | P52294      | 60  | 0   | 0   | 0   | 10  | #DIV/0! | #DIV/0! | #DIV/0! |
| 977 | Importin subunit alpha-7 KPNA6                                    | O60684      | 60  | 6   | 11  | 9   | 12  | 1.83    | 1.50    | 2.00    |
| 978 | Importin subunit beta-1 KPNB1                                     | Q14974      | 97  | 121 | 89  | 100 | 101 | 0.74    | 0.83    | 0.83    |
| 979 | Importin-11 IPO11                                                 | Q9UI26      | 113 | 0   | 4   | 3   | 4   | #DIV/0! | #DIV/0! | #DIV/0! |
| 980 | Importin-4 IPO4                                                   | Q8TEX9      | 119 | 7   | 14  | 13  | 6   | 2.00    | 1.86    | 0.86    |
| 981 | Importin-5 IPO5                                                   | O00410      | 124 | 76  | 80  | 69  | 84  | 1.05    | 0.91    | 1.11    |



|      |                                                                                     |        |     |     |     |     |     |         |         |         |
|------|-------------------------------------------------------------------------------------|--------|-----|-----|-----|-----|-----|---------|---------|---------|
| 982  | Importin-7 IPO7                                                                     | Q95373 | 120 | 66  | 58  | 73  | 63  | 0.88    | 1.11    | 0.95    |
| 983  | Importin-9 IPO9                                                                     | Q96P70 | 116 | 5   | 5   | 3   | 4   | 1.00    | 0.60    | 0.80    |
| 984  | Inorganic pyrophosphatase PPA1                                                      | Q15181 | 33  | 31  | 35  | 31  | 27  | 1.13    | 1.00    | 0.87    |
| 985  | Inorganic pyrophosphatase 2, mitochondrial PPA2                                     | Q9HZU2 | 38  | 13  | 18  | 24  | 18  | 1.38    | 1.85    | 1.38    |
| 986  | Inosine triphosphate pyrophosphatase ITPA                                           | Q9BY32 | 21  | 5   | 0   | 3   | 0   | 0.00    | 0.60    | 0.00    |
| 987  | Inosine-5'-monophosphate dehydrogenase 1 IMPDH1                                     | P20839 | 55  | 0   | 0   | 7   | 6   | #DIV/0! | #DIV/0! | #DIV/0! |
| 988  | Inosine-5'-monophosphate dehydrogenase 2 IMPDH2                                     | P12268 | 56  | 28  | 30  | 32  | 23  | 1.07    | 1.14    | 0.82    |
| 989  | Inositol 1,4,5-trisphosphate receptor type 3 ITPR3                                  | Q14573 | 304 | 14  | 11  | 5   | 14  | 0.79    | 0.36    | 1.00    |
| 990  | Inositol monophosphatase 1 IMPA1                                                    | P29218 | 30  | 9   | 7   | 9   | 10  | 0.78    | 1.00    | 1.11    |
| 991  | Inositol monophosphatase 3 IMPAD1                                                   | Q9NX62 | 39  | 0   | 0   | 2   | 0   | #DIV/0! | #DIV/0! | #DIV/0! |
| 992  | Inositol-trisphosphate 3-kinase C ITPKC                                             | Q96DU7 | 75  | 0   | 4   | 0   | 0   | #DIV/0! | #DIV/0! | #DIV/0! |
| 993  | Insulin-degrading enzyme IDE                                                        | P14735 | 118 | 11  | 11  | 12  | 13  | 1.00    | 1.09    | 1.18    |
| 994  | Insulin-like growth factor 2 mRNA-binding protein 2 IGF2BP2                         | Q9Y6M1 | 66  | 3   | 9   | 8   | 7   | 3.00    | 2.67    | 2.33    |
| 995  | Integrin alpha-2 ITGA2                                                              | P17301 | 129 | 40  | 41  | 52  | 45  | 1.03    | 1.30    | 1.13    |
| 996  | Integrin alpha-3 ITGA3                                                              | P26006 | 117 | 20  | 29  | 30  | 29  | 1.45    | 1.50    | 1.45    |
| 997  | Integrin alpha-6 ITGA6                                                              | P23229 | 127 | 16  | 12  | 16  | 15  | 0.75    | 1.00    | 0.94    |
| 998  | Integrin alpha-V ITGAV                                                              | P06756 | 116 | 22  | 22  | 34  | 26  | 1.00    | 1.55    | 1.18    |
| 999  | Integrin beta-1 ITGB1                                                               | P05556 | 88  | 63  | 52  | 61  | 68  | 0.83    | 0.97    | 1.08    |
| 1000 | Integrin beta-4 ITGB4                                                               | P16144 | 202 | 114 | 112 | 84  | 84  | 0.98    | 0.74    | 0.74    |
| 1001 | Integrin beta-6 ITGB6                                                               | P18564 | 86  | 16  | 7   | 15  | 9   | 0.44    | 0.94    | 0.56    |
| 1002 | Integrin-linked protein kinase ILK                                                  | Q13418 | 51  | 9   | 5   | 8   | 8   | 0.56    | 0.89    | 0.89    |
| 1003 | Intercellular adhesion molecule 1 ICAM1                                             | P05362 | 58  | 0   | 15  | 0   | 13  | #DIV/0! | #DIV/0! | #DIV/0! |
| 1004 | Interferon regulatory factor 6 IRF6                                                 | O14896 | 53  | 22  | 17  | 16  | 15  | 0.77    | 0.73    | 0.68    |
| 1005 | Interferon-induced guanylate-binding protein 1 GBP1                                 | P32455 | 68  | 0   | 19  | 4   | 6   | #DIV/0! | #DIV/0! | #DIV/0! |
| 1006 | Interferon-induced transmembrane protein 3 IFITM3                                   | Q01628 | 15  | 5   | 3   | 3   | 3   | 0.60    | 0.60    | 0.60    |
| 1007 | Interferon-induced, double-stranded RNA-activated protein kinase EIF2AK2            | P19525 | 62  | 0   | 0   | 2   | 0   | #DIV/0! | #DIV/0! | #DIV/0! |
| 1008 | Interleukin enhancer-binding factor 2 ILF2                                          | Q12905 | 43  | 9   | 12  | 11  | 11  | 1.33    | 1.22    | 1.22    |
| 1009 | Interleukin enhancer-binding factor 3 ILF3                                          | Q12906 | 95  | 20  | 29  | 30  | 24  | 1.45    | 1.50    | 1.20    |
| 1010 | Interleukin-1 alpha IL1A                                                            | P01583 | 31  | 9   | 10  | 4   | 8   | 1.11    | 0.44    | 0.89    |
| 1011 | Interleukin-1 beta IL1B                                                             | P01584 | 31  | 0   | 3   | 0   | 0   | #DIV/0! | #DIV/0! | #DIV/0! |
| 1012 | Interleukin-1 receptor antagonist protein IL1RN                                     | P18510 | 20  | 9   | 9   | 5   | 7   | 1.00    | 0.56    | 0.78    |
| 1013 | Interleukin-18 IL18                                                                 | Q14116 | 22  | 14  | 19  | 16  | 20  | 1.36    | 1.14    | 1.43    |
| 1014 | Interleukin-36 gamma IL36G                                                          | Q9NZH8 | 19  | 0   | 2   | 0   | 0   | #DIV/0! | #DIV/0! | #DIV/0! |
| 1015 | Intraflagellar transport protein 25 homolog HSPB11                                  | Q9Y547 | 16  | 5   | 3   | 2   | 0   | 0.60    | 0.40    | 0.00    |
| 1016 | Intraflagellar transport protein 27 homolog IFT27                                   | Q98W83 | 20  | 4   | 0   | 0   | 0   | 0.00    | 0.00    | 0.00    |
| 1017 | Inverted formin-2 INF2                                                              | Q27J81 | 136 | 7   | 12  | 12  | 16  | 1.71    | 1.71    | 2.29    |
| 1018 | Involucrin IVL                                                                      | P07476 | 68  | 52  | 43  | 45  | 47  | 0.83    | 0.87    | 0.90    |
| 1019 | Isoamyl acetate-hydrolyzing esterase 1 homolog IAHI                                 | Q27AA2 | 28  | 5   | 0   | 3   | 2   | 0.00    | 0.60    | 0.40    |
| 1020 | Isochorismatase domain-containing protein 2, mitochondrial ISOC2                    | Q96AB3 | 22  | 5   | 6   | 5   | 0   | 1.20    | 1.00    | 0.00    |
| 1021 | Isocitrate dehydrogenase [NAD] subunit alpha, mitochondrial IDH3A                   | P50213 | 40  | 7   | 15  | 11  | 11  | 2.14    | 1.57    | 1.57    |
| 1022 | Isocitrate dehydrogenase [NAD] subunit beta, mitochondrial IDH3B                    | O43837 | 42  | 3   | 5   | 5   | 2   | 1.67    | 1.67    | 0.67    |
| 1023 | Isocitrate dehydrogenase [NADP] cytoplasmic IDH1                                    | O75874 | 47  | 54  | 55  | 44  | 45  | 1.02    | 0.81    | 0.83    |
| 1024 | Isocitrate dehydrogenase [NADP], mitochondrial IDH2                                 | P48735 | 51  | 15  | 17  | 10  | 14  | 1.13    | 0.67    | 0.93    |
| 1025 | Isoleucine--tRNA ligase, cytoplasmic IARS                                           | P41252 | 145 | 64  | 58  | 59  | 67  | 0.91    | 0.92    | 1.05    |
| 1026 | Isoleucine--tRNA ligase, mitochondrial IARS2                                        | Q9NSE4 | 114 | 10  | 7   | 11  | 8   | 0.70    | 1.10    | 0.80    |
| 1027 | Isopentenyl-diphosphate Delta-isomerase 1 IDI1                                      | Q13907 | 26  | 43  | 43  | 45  | 54  | 1.00    | 1.05    | 1.26    |
| 1028 | IST1 homolog IST1                                                                   | P53990 | 40  | 0   | 4   | 0   | 4   | #DIV/0! | #DIV/0! | #DIV/0! |
| 1029 | Junction plakoglobin JUP                                                            | P14923 | 82  | 65  | 64  | 49  | 69  | 0.98    | 0.75    | 1.06    |
| 1030 | Junctional adhesion molecule A F11R                                                 | Q9Y624 | 33  | 9   | 6   | 6   | 3   | 0.67    | 0.67    | 0.33    |
| 1031 | Keratin, type I cytoskeletal 10 KRT10                                               | P13645 | 59  | 404 | 422 | 387 | 378 | 1.04    | 0.96    | 0.94    |
| 1032 | Keratin, type I cytoskeletal 13 KRT13                                               | P13646 | 50  | 18  | 36  | 20  | 8   | 2.00    | 1.11    | 0.44    |
| 1033 | Keratin, type I cytoskeletal 14 KRT14                                               | P02533 | 52  | 211 | 208 | 158 | 162 | 0.99    | 0.75    | 0.77    |
| 1034 | Keratin, type I cytoskeletal 16 KRT16                                               | P08779 | 51  | 124 | 154 | 81  | 58  | 1.24    | 0.65    | 0.47    |
| 1035 | Keratin, type I cytoskeletal 17 KRT17                                               | Q04695 | 48  | 321 | 325 | 296 | 295 | 1.01    | 0.92    | 0.92    |
| 1036 | Keratin, type I cytoskeletal 18 KRT18                                               | P05783 | 48  | 20  | 19  | 17  | 20  | 0.95    | 0.85    | 1.00    |
| 1037 | Keratin, type I cytoskeletal 19 KRT19                                               | P08727 | 44  | 130 | 108 | 103 | 83  | 0.83    | 0.79    | 0.64    |
| 1038 | Keratin, type I cytoskeletal 27 KRT27                                               | Q723Y8 | 50  | 15  | 0   | 0   | 0   | 0.00    | 0.00    | 0.00    |
| 1039 | Keratin, type I cytoskeletal 9 KRT9                                                 | P35527 | 62  | 369 | 395 | 321 | 327 | 1.07    | 0.87    | 0.89    |
| 1040 | Keratin, type II cytoskeletal 1 KRT1                                                | P04264 | 66  | 609 | 629 | 563 | 567 | 1.03    | 0.92    | 0.93    |
| 1041 | Keratin, type II cytoskeletal 1b KRT77                                              | Q72794 | 62  | 0   | 16  | 0   | 0   | #DIV/0! | #DIV/0! | #DIV/0! |
| 1042 | Keratin, type II cytoskeletal 2 epidermal KRT2                                      | P35908 | 65  | 358 | 443 | 333 | 347 | 1.24    | 0.93    | 0.97    |
| 1043 | Keratin, type II cytoskeletal 2 oral KRT76                                          | Q01546 | 66  | 15  | 0   | 0   | 0   | 0.00    | 0.00    | 0.00    |
| 1044 | Keratin, type II cytoskeletal 3 KRT3                                                | P12035 | 64  | 0   | 25  | 0   | 0   | #DIV/0! | #DIV/0! | #DIV/0! |
| 1045 | Keratin, type II cytoskeletal 4 KRT4                                                | P19013 | 57  | 0   | 49  | 36  | 8   | #DIV/0! | #DIV/0! | #DIV/0! |
| 1046 | Keratin, type II cytoskeletal 5 KRT5                                                | P13647 | 62  | 359 | 400 | 337 | 338 | 1.11    | 0.94    | 0.94    |
| 1047 | Keratin, type II cytoskeletal 6A KRT6A                                              | P02538 | 60  | 322 | 386 | 297 | 271 | 1.20    | 0.92    | 0.84    |
| 1048 | Keratin, type II cytoskeletal 6B KRT6B                                              | P04259 | 60  | 219 | 267 | 193 | 113 | 1.22    | 0.88    | 0.52    |
| 1049 | Keratin, type II cytoskeletal 7 KRT7                                                | P08729 | 51  | 235 | 189 | 194 | 191 | 0.80    | 0.83    | 0.81    |
| 1050 | Keratin, type II cytoskeletal 78 KRT78                                              | Q8N1N4 | 57  | 3   | 10  | 0   | 0   | 3.33    | 0.00    | 0.00    |
| 1051 | Keratin, type II cytoskeletal 8 KRT8                                                | P05787 | 54  | 87  | 55  | 68  | 66  | 0.63    | 0.78    | 0.76    |
| 1052 | Keratin, type II cytoskeletal 80 KRT80                                              | Q6KB66 | 51  | 0   | 4   | 0   | 0   | #DIV/0! | #DIV/0! | #DIV/0! |
| 1053 | Keratinocyte proline-rich protein KPRP                                              | Q57149 | 64  | 0   | 3   | 0   | 0   | #DIV/0! | #DIV/0! | #DIV/0! |
| 1054 | KH domain-containing, RNA-binding, signal transduction-associated protein 1 KHDRBS1 | Q07666 | 48  | 0   | 0   | 2   | 3   | #DIV/0! | #DIV/0! | #DIV/0! |
| 1055 | KIF1-binding protein KIAA1279                                                       | Q96EK5 | 72  | 0   | 2   | 0   | 5   | #DIV/0! | #DIV/0! | #DIV/0! |
| 1056 | Kinectin KTN1                                                                       | Q86UP2 | 156 | 0   | 11  | 22  | 22  | #DIV/0! | #DIV/0! | #DIV/0! |
| 1057 | Kinesin light chain 1 KLC1                                                          | Q07866 | 65  | 16  | 23  | 21  | 17  | 1.44    | 1.31    | 1.06    |
| 1058 | Kinesin light chain 2 KLC2                                                          | Q9H086 | 69  | 0   | 17  | 13  | 15  | #DIV/0! | #DIV/0! | #DIV/0! |
| 1059 | Kinesin-1 heavy chain KIF5B                                                         | P33176 | 110 | 90  | 90  | 89  | 84  | 1.00    | 0.99    | 0.93    |
| 1060 | Kinesin-like protein KIF1C KIF1C                                                    | O43896 | 123 | 0   | 2   | 2   | 2   | #DIV/0! | #DIV/0! | #DIV/0! |
| 1061 | Kynureninase KYNU                                                                   | Q16719 | 52  | 9   | 6   | 4   | 2   | 0.67    | 0.44    | 0.22    |
| 1062 | Kynurenine--oxoglutarate transaminase 3 CCBL2                                       | Q6YP21 | 51  | 0   | 0   | 3   | 0   | #DIV/0! | #DIV/0! | #DIV/0! |
| 1063 | Lactoylglutathione lyase GLO1                                                       | Q04760 | 21  | 24  | 20  | 22  | 14  | 0.83    | 0.92    | 0.58    |

|      |                                                                                |        |     |     |     |     |     |         |         |         |
|------|--------------------------------------------------------------------------------|--------|-----|-----|-----|-----|-----|---------|---------|---------|
| 1064 | Ladinin-1 LAD1                                                                 | O00515 | 57  | 8   | 11  | 11  | 10  | 1.38    | 1.38    | 1.25    |
| 1065 | Lamin-B1 LMNB1                                                                 | P20700 | 66  | 0   | 0   | 0   | 9   | #DIV/0! | #DIV/0! | #DIV/0! |
| 1066 | Lamin-B2 LMNB2                                                                 | Q03252 | 68  | 0   | 13  | 5   | 10  | #DIV/0! | #DIV/0! | #DIV/0! |
| 1067 | Laminin subunit alpha-3 LAMA3                                                  | Q16787 | 367 | 7   | 15  | 9   | 0   | 2.14    | 1.29    | 0.00    |
| 1068 | Laminin subunit beta-1 LAMB1                                                   | P07942 | 198 | 0   | 0   | 4   | 0   | #DIV/0! | #DIV/0! | #DIV/0! |
| 1069 | Laminin subunit beta-3 LAMB3                                                   | Q13751 | 130 | 65  | 57  | 54  | 55  | 0.88    | 0.83    | 0.85    |
| 1070 | Laminin subunit gamma-1 LAMC1                                                  | P11047 | 178 | 0   | 0   | 2   | 2   | #DIV/0! | #DIV/0! | #DIV/0! |
| 1071 | Laminin subunit gamma-2 LAMC2                                                  | Q13753 | 131 | 60  | 42  | 49  | 45  | 0.70    | 0.82    | 0.75    |
| 1072 | L-aminoadipate-semialdehyde dehydrogenase-phosphopantetheinyl transferase AASD | Q9NRN7 | 36  | 3   | 7   | 9   | 5   | 2.33    | 3.00    | 1.67    |
| 1073 | LanC-like protein 1 LANCL1                                                     | O43813 | 45  | 4   | 4   | 0   | 3   | 1.00    | 0.00    | 0.75    |
| 1074 | Lanosterol 14-alpha demethylase CYP51A1                                        | Q16850 | 57  | 7   | 4   | 2   | 2   | 0.57    | 0.29    | 0.29    |
| 1075 | Lanosterol synthase LSS                                                        | P48449 | 83  | 17  | 17  | 24  | 23  | 1.00    | 1.41    | 1.35    |
| 1076 | La-related protein 1 LARP1                                                     | Q6PKG0 | 124 | 9   | 13  | 14  | 9   | 1.44    | 1.56    | 1.00    |
| 1077 | La-related protein 4B LARP4B                                                   | Q92615 | 81  | 0   | 0   | 2   | 0   | #DIV/0! | #DIV/0! | #DIV/0! |
| 1078 | Large neutral amino acids transporter small subunit 1 SLC7A5                   | Q01650 | 55  | 10  | 9   | 11  | 9   | 0.90    | 1.10    | 0.90    |
| 1079 | Large proline-rich protein BAG6 BAG6                                           | P46379 | 119 | 7   | 13  | 9   | 7   | 1.86    | 1.29    | 1.00    |
| 1080 | LDLR chaperone MESD MESDC2                                                     | Q14696 | 26  | 9   | 15  | 10  | 10  | 1.67    | 1.11    | 1.11    |
| 1081 | LETM1 and EF-hand domain-containing protein 1, mitochondrial LETM1             | O95202 | 83  | 10  | 9   | 14  | 16  | 0.90    | 1.40    | 1.60    |
| 1082 | Leucine zipper protein 1 LUZP1                                                 | Q86V48 | 120 | 2   | 0   | 4   | 3   | 0.00    | 2.00    | 1.50    |
| 1083 | Leucine-rich PPR motif-containing protein, mitochondrial LRPPRC                | P42704 | 158 | 40  | 61  | 68  | 64  | 1.53    | 1.70    | 1.60    |
| 1084 | Leucine-rich repeat flightless-interacting protein 1 LRRFIP1                   | Q32M24 | 89  | 34  | 26  | 26  | 25  | 0.76    | 0.76    | 0.74    |
| 1085 | Leucine-rich repeat-containing protein 15 LRRC15                               | Q8TF66 | 64  | 0   | 8   | 0   | 4   | #DIV/0! | #DIV/0! | #DIV/0! |
| 1086 | Leucine-rich repeat-containing protein 40 LRRC40                               | Q9H9A6 | 68  | 0   | 6   | 5   | 5   | #DIV/0! | #DIV/0! | #DIV/0! |
| 1087 | Leucine-rich repeat-containing protein 47 LRRC47                               | Q8N1G4 | 63  | 10  | 11  | 14  | 17  | 1.10    | 1.40    | 1.70    |
| 1088 | Leucine-rich repeat-containing protein 57 LRRC57                               | Q8N9N7 | 27  | 2   | 2   | 0   | 0   | 1.00    | 0.00    | 0.00    |
| 1089 | Leucine-rich repeat-containing protein 59 LRRC59                               | Q96AG4 | 35  | 24  | 27  | 27  | 25  | 1.13    | 1.13    | 1.04    |
| 1090 | Leucine--tRNA ligase, cytoplasmic LARS                                         | Q9P2J5 | 134 | 48  | 49  | 58  | 46  | 1.02    | 1.21    | 0.96    |
| 1091 | Leucyl-cystinyl aminopeptidase LNPEP                                           | Q9UIQ6 | 117 | 0   | 7   | 17  | 11  | #DIV/0! | #DIV/0! | #DIV/0! |
| 1092 | Leukocyte elastase inhibitor SERPINB1                                          | P30740 | 43  | 28  | 31  | 30  | 26  | 1.11    | 1.07    | 0.93    |
| 1093 | Leukotriene A-4 hydrolase LTA4H                                                | P09960 | 69  | 40  | 34  | 41  | 36  | 0.85    | 1.03    | 0.90    |
| 1094 | Leupaxin LPXN                                                                  | O60711 | 43  | 0   | 0   | 0   | 3   | #DIV/0! | #DIV/0! | #DIV/0! |
| 1095 | LIM and senescent cell antigen-like-containing domain protein 1 LIMS1          | P48059 | 37  | 0   | 0   | 2   | 0   | #DIV/0! | #DIV/0! | #DIV/0! |
| 1096 | LIM and SH3 domain protein 1 LASP1                                             | Q14847 | 30  | 21  | 18  | 23  | 20  | 0.86    | 1.10    | 0.95    |
| 1097 | LIM domain and actin-binding protein 1 LIMA1                                   | Q9UHB6 | 85  | 68  | 78  | 75  | 81  | 1.15    | 1.10    | 1.19    |
| 1098 | Lipoma-preferred partner LPP                                                   | Q93052 | 66  | 0   | 2   | 0   | 4   | #DIV/0! | #DIV/0! | #DIV/0! |
| 1099 | Lipopolysaccharide-responsive and beige-like anchor protein LRBA               | P50851 | 319 | 16  | 11  | 10  | 16  | 0.69    | 0.63    | 1.00    |
| 1100 | Liprin-beta-1 PPF1BP1                                                          | Q86W92 | 114 | 2   | 0   | 0   | 0   | 0.00    | 0.00    | 0.00    |
| 1101 | LisH domain and HEAT repeat-containing protein KIAA1468 KIAA1468               | Q9P260 | 135 | 0   | 0   | 3   | 2   | #DIV/0! | #DIV/0! | #DIV/0! |
| 1102 | L-lactate dehydrogenase A chain LDHA                                           | P00338 | 37  | 326 | 393 | 393 | 367 | 1.21    | 1.21    | 1.13    |
| 1103 | L-lactate dehydrogenase B chain LDHB                                           | P07195 | 37  | 83  | 90  | 78  | 106 | 1.08    | 0.94    | 1.28    |
| 1104 | Lon protease homolog, mitochondrial LONP1                                      | P36776 | 106 | 5   | 9   | 13  | 15  | 1.80    | 2.60    | 3.00    |
| 1105 | Long-chain-fatty-acid--CoA ligase 3 ACSL3                                      | O95573 | 80  | 15  | 13  | 15  | 19  | 0.87    | 1.00    | 1.27    |
| 1106 | Long-chain-fatty-acid--CoA ligase 4 ACSL4                                      | O60488 | 79  | 0   | 0   | 0   | 5   | #DIV/0! | #DIV/0! | #DIV/0! |
| 1107 | Low molecular weight phosphotyrosine protein phosphatase ACP1                  | P24666 | 18  | 5   | 7   | 5   | 0   | 1.40    | 1.00    | 0.00    |
| 1108 | Low-density lipoprotein receptor LDLR                                          | P01130 | 95  | 29  | 36  | 21  | 23  | 1.24    | 0.72    | 0.79    |
| 1109 | Lupus La protein SSB                                                           | P05455 | 47  | 22  | 24  | 22  | 21  | 1.09    | 1.00    | 0.95    |
| 1110 | L-xylulose reductase DCXR                                                      | Q724W1 | 26  | 0   | 0   | 3   | 0   | #DIV/0! | #DIV/0! | #DIV/0! |
| 1111 | Lys-63-specific deubiquitinase BRCC36 BRCC3                                    | P46736 | 36  | 0   | 2   | 0   | 0   | #DIV/0! | #DIV/0! | #DIV/0! |
| 1112 | Lysine--tRNA ligase KARS                                                       | Q15046 | 68  | 41  | 37  | 40  | 37  | 0.90    | 0.98    | 0.90    |
| 1113 | Lysophosphatidylcholine acyltransferase 1 LPCAT1                               | Q8NF37 | 59  | 2   | 0   | 0   | 0   | 0.00    | 0.00    | 0.00    |
| 1114 | Lysophospholipase-like protein 1 LYPLAL1                                       | Q5VW22 | 26  | 0   | 4   | 4   | 3   | #DIV/0! | #DIV/0! | #DIV/0! |
| 1115 | Lysosomal alpha-mannosidase MAN2B1                                             | O00754 | 114 | 5   | 5   | 4   | 6   | 1.00    | 0.80    | 1.20    |
| 1116 | Lysosomal protective protein CTSA                                              | P10619 | 54  | 0   | 0   | 3   | 2   | #DIV/0! | #DIV/0! | #DIV/0! |
| 1117 | Lysosome membrane protein 2 SCARB2                                             | Q14108 | 54  | 10  | 13  | 14  | 12  | 1.30    | 1.40    | 1.20    |
| 1118 | Lysosome-associated membrane glycoprotein 1 LAMP1                              | P11279 | 45  | 31  | 25  | 27  | 25  | 0.81    | 0.87    | 0.81    |
| 1119 | Lysosome-associated membrane glycoprotein 2 LAMP2                              | P13473 | 45  | 17  | 16  | 17  | 18  | 0.94    | 1.00    | 1.06    |
| 1120 | Macrophage migration inhibitory factor MIF                                     | P14174 | 12  | 26  | 18  | 22  | 25  | 0.69    | 0.85    | 0.96    |
| 1121 | Macrophage-capping protein CAPG                                                | P40121 | 38  | 32  | 33  | 38  | 36  | 1.03    | 1.19    | 1.13    |
| 1122 | Major vault protein MVP                                                        | Q14764 | 99  | 112 | 88  | 92  | 86  | 0.79    | 0.82    | 0.77    |
| 1123 | Malate dehydrogenase, cytoplasmic MDH1                                         | P40925 | 36  | 34  | 30  | 33  | 33  | 0.88    | 0.97    | 0.97    |
| 1124 | Malate dehydrogenase, mitochondrial MDH2                                       | P40926 | 36  | 70  | 68  | 73  | 68  | 0.97    | 1.04    | 0.97    |
| 1125 | Maleylacetoacetate isomerase GSTZ1                                             | O43708 | 24  | 3   | 0   | 5   | 0   | 0.00    | 1.67    | 0.00    |
| 1126 | Malignant T-cell-amplified sequence 1 MCTS1                                    | Q9ULC4 | 21  | 13  | 8   | 8   | 8   | 0.62    | 0.62    | 0.62    |
| 1127 | Mannose-1-phosphate guanylyltransferase alpha GMPPA                            | Q96I6  | 46  | 0   | 0   | 4   | 0   | #DIV/0! | #DIV/0! | #DIV/0! |
| 1128 | Mannose-1-phosphate guanylyltransferase beta GMPPB                             | Q9Y5P6 | 40  | 0   | 3   | 3   | 0   | #DIV/0! | #DIV/0! | #DIV/0! |
| 1129 | Mannosyl-oligosaccharide glucosidase MOGS                                      | Q13724 | 92  | 4   | 5   | 7   | 9   | 1.25    | 1.75    | 2.25    |
| 1130 | MAP7 domain-containing protein 1 MAP7D1                                        | Q3KQU3 | 93  | 0   | 5   | 5   | 7   | #DIV/0! | #DIV/0! | #DIV/0! |
| 1131 | Matrin-3 MATR3                                                                 | P43243 | 95  | 20  | 15  | 16  | 19  | 0.75    | 0.80    | 0.95    |
| 1132 | Matrix metalloproteinase-14 MMP14                                              | P50281 | 66  | 0   | 0   | 3   | 0   | #DIV/0! | #DIV/0! | #DIV/0! |
| 1133 | Medium-chain specific acyl-CoA dehydrogenase, mitochondrial ACADM              | P11310 | 47  | 0   | 2   | 0   | 0   | #DIV/0! | #DIV/0! | #DIV/0! |
| 1134 | Melanoma-associated antigen D2 MAGED2                                          | Q9UNF1 | 65  | 0   | 0   | 3   | 0   | #DIV/0! | #DIV/0! | #DIV/0! |
| 1135 | Membrane magnesium transporter 1 MMGT1                                         | Q8N4V1 | 15  | 4   | 0   | 0   | 0   | 0.00    | 0.00    | 0.00    |
| 1136 | Membrane-associated progesterone receptor component 1 PGRMC1                   | O00264 | 22  | 0   | 5   | 6   | 6   | #DIV/0! | #DIV/0! | #DIV/0! |
| 1137 | Membrane-associated progesterone receptor component 2 PGRMC2                   | O15173 | 24  | 9   | 11  | 12  | 14  | 1.22    | 1.33    | 1.56    |
| 1138 | Mesencephalic astrocyte-derived neurotrophic factor MANF                       | P55145 | 21  | 9   | 9   | 5   | 5   | 1.00    | 0.56    | 0.56    |
| 1139 | Metallothionein-2 MT2A                                                         | P02795 | 6   | 12  | 6   | 10  | 11  | 0.50    | 0.83    | 0.92    |
| 1140 | Methionine adenosyltransferase 2 subunit beta MAT2B                            | Q9NZL9 | 38  | 0   | 7   | 12  | 10  | #DIV/0! | #DIV/0! | #DIV/0! |
| 1141 | Methionine aminopeptidase 1 METAP1                                             | P53582 | 43  | 0   | 3   | 4   | 3   | #DIV/0! | #DIV/0! | #DIV/0! |
| 1142 | Methionine synthase MTR                                                        | Q99707 | 141 | 0   | 0   | 3   | 0   | #DIV/0! | #DIV/0! | #DIV/0! |
| 1143 | Methionine--tRNA ligase, cytoplasmic MARS                                      | P56192 | 101 | 34  | 22  | 24  | 27  | 0.65    | 0.71    | 0.79    |
| 1144 | Methylsulfone monooxygenase 50 WDR77                                           | Q9BQA1 | 37  | 6   | 5   | 11  | 7   | 0.83    | 1.83    | 1.17    |
| 1145 | Methylsterol monooxygenase 1 MSMO1                                             | Q15800 | 35  | 3   | 2   | 0   | 0   | 0.67    | 0.00    | 0.00    |



|      |                                                                                 |             |     |      |      |      |      |         |         |         |
|------|---------------------------------------------------------------------------------|-------------|-----|------|------|------|------|---------|---------|---------|
| 1146 | Methylthioribose-1-phosphate isomerase MRI1                                     | Q9BV20      | 39  | 0    | 3    | 0    | 0    | #DIV/0! | #DIV/0! | #DIV/0! |
| 1147 | Methyltransferase-like protein 13 METTL13                                       | Q8N6R0      | 79  | 0    | 0    | 2    | 0    | #DIV/0! | #DIV/0! | #DIV/0! |
| 1148 | Mevalonate kinase MVK                                                           | Q03426      | 42  | 6    | 8    | 5    | 5    | 1.33    | 0.83    | 0.83    |
| 1149 | MICAL-like protein 1 MICAL1                                                     | Q8N3F8      | 93  | 7    | 3    | 0    | 2    | 0.43    | 0.00    | 0.29    |
| 1150 | Microsomal glutathione S-transferase 1 MGST1                                    | P10620      | 18  | 19   | 22   | 20   | 14   | 1.16    | 1.05    | 0.74    |
| 1151 | Microtubule-actin cross-linking factor 1, isoforms 1/2/3/5 MACF1                | Q9UPN3      | 838 | 115  | 194  | 233  | 195  | 1.69    | 2.03    | 1.70    |
| 1152 | Microtubule-associated protein 1B MAP1B                                         | P46821      | 271 | 3    | 0    | 3    | 0    | 0.00    | 1.00    | 0.00    |
| 1153 | Microtubule-associated protein 4 MAP4                                           | P27816      | 121 | 108  | 84   | 85   | 99   | 0.78    | 0.79    | 0.92    |
| 1154 | Microtubule-associated protein RP/EB family member 1 MAPRE1                     | Q15691      | 30  | 15   | 17   | 24   | 19   | 1.13    | 1.60    | 1.27    |
| 1155 | Minor histocompatibility antigen H13 HM13                                       | Q8TCT9      | 41  | 0    | 3    | 0    | 2    | #DIV/0! | #DIV/0! | #DIV/0! |
| 1156 | Mitochondrial 2-oxoglutarate/malate carrier protein SLC25A11                    | Q02978      | 34  | 0    | 0    | 2    | 2    | #DIV/0! | #DIV/0! | #DIV/0! |
| 1157 | Mitochondrial fission 1 protein FIS1                                            | Q9Y3D6      | 17  | 9    | 8    | 7    | 10   | 0.89    | 0.78    | 1.11    |
| 1158 | Mitochondrial import inner membrane translocase subunit Tim13 TIMM13            | Q9Y5L4      | 11  | 0    | 0    | 3    | 3    | #DIV/0! | #DIV/0! | #DIV/0! |
| 1159 | Mitochondrial import inner membrane translocase subunit TIM50 TIMM50            | Q32CQ8      | 40  | 0    | 0    | 0    | 2    | #DIV/0! | #DIV/0! | #DIV/0! |
| 1160 | Mitochondrial import receptor subunit TOM22 homolog TOMM22                      | Q9NS69      | 16  | 6    | 4    | 3    | 4    | 0.67    | 0.50    | 0.67    |
| 1161 | Mitochondrial import receptor subunit TOM34 TOMM34                              | Q15785      | 35  | 0    | 4    | 0    | 0    | #DIV/0! | #DIV/0! | #DIV/0! |
| 1162 | Mitochondrial-processing peptidase subunit alpha PMPCA                          | Q10713      | 58  | 0    | 4    | 0    | 3    | #DIV/0! | #DIV/0! | #DIV/0! |
| 1163 | Mitochondrial-processing peptidase subunit beta PMPCB                           | O75439      | 54  | 0    | 0    | 2    | 0    | #DIV/0! | #DIV/0! | #DIV/0! |
| 1164 | Mitogen-activated protein kinase 1 MAPK1                                        | P28482      | 41  | 27   | 20   | 23   | 26   | 0.74    | 0.85    | 0.96    |
| 1165 | Mitogen-activated protein kinase 14 MAPK14                                      | Q16539      | 41  | 12   | 6    | 12   | 8    | 0.50    | 1.00    | 0.67    |
| 1166 | Mitotic checkpoint protein BUB3 BUB3                                            | O43684      | 37  | 5    | 3    | 3    | 3    | 0.60    | 0.60    | 0.60    |
| 1167 | Mitotic interactor and substrate of PK1 MISP                                    | Q8IVT2      | 75  | 15   | 16   | 11   | 9    | 1.07    | 0.73    | 0.60    |
| 1168 | MMS19 nucleotide excision repair protein homolog MMS19                          | Q96T76      | 113 | 8    | 13   | 11   | 9    | 1.63    | 1.38    | 1.13    |
| 1169 | MOB kinase activator 1A MOB1A                                                   | Q9H859      | 25  | 2    | 9    | 4    | 0    | 4.50    | 2.00    | 0.00    |
| 1170 | MOB-like protein phocein MOB4                                                   | Q9Y3A3      | 26  | 4    | 5    | 2    | 0    | 1.25    | 0.50    | 0.00    |
| 1171 | Moesin MSN                                                                      | P26038      | 68  | 233  | 205  | 221  | 215  | 0.88    | 0.95    | 0.92    |
| 1172 | Monocarboxylate transporter 4 SLC16A3                                           | O15427      | 49  | 2    | 6    | 3    | 10   | 3.00    | 1.50    | 5.00    |
| 1173 | Monofunctional C1-tetrahydrofolate synthase, mitochondrial MTHFD1L              | Q6UB35      | 106 | 0    | 0    | 2    | 3    | #DIV/0! | #DIV/0! | #DIV/0! |
| 1174 | Monoglyceride lipase MGLL                                                       | Q99685      | 33  | 3    | 2    | 3    | 0    | 0.67    | 1.00    | 0.00    |
| 1175 | mRNA turnover protein 4 homolog MRTO4                                           | Q9UKD2      | 28  | 0    | 0    | 2    | 3    | #DIV/0! | #DIV/0! | #DIV/0! |
| 1176 | Multifunctional methyltransferase subunit TRM112-like protein TRMT112           | Q9UI30      | 14  | 10   | 9    | 7    | 9    | 0.90    | 0.70    | 0.90    |
| 1177 | Multifunctional protein ADE2 PAICS                                              | P22234      | 47  | 29   | 34   | 33   | 39   | 1.17    | 1.14    | 1.34    |
| 1178 | Myb-binding protein 1A MYBBP1A                                                  | Q9BQGO      | 149 | 0    | 5    | 12   | 11   | #DIV/0! | #DIV/0! | #DIV/0! |
| 1179 | Mycophenolic acid acyl-glucuronide esterase, mitochondrial ABHD10               | Q9NUJ1      | 34  | 0    | 0    | 0    | 2    | #DIV/0! | #DIV/0! | #DIV/0! |
| 1180 | Myelin protein zero-like protein 2 MPZL2                                        | O60487      | 24  | 0    | 3    | 0    | 0    | #DIV/0! | #DIV/0! | #DIV/0! |
| 1181 | Myeloid differentiation primary response protein MyD88 MYD88                    | Q99836      | 33  | 0    | 2    | 0    | 0    | #DIV/0! | #DIV/0! | #DIV/0! |
| 1182 | Myeloid-associated differentiation marker MYADM                                 | Q96597      | 35  | 0    | 0    | 0    | 3    | #DIV/0! | #DIV/0! | #DIV/0! |
| 1183 | Myoferlin MYOF                                                                  | Q9NZM1      | 235 | 109  | 123  | 132  | 136  | 1.13    | 1.21    | 1.25    |
| 1184 | Myosin light polypeptide 6 MYL6                                                 | P06660      | 17  | 54   | 45   | 50   | 39   | 0.83    | 0.93    | 0.72    |
| 1185 | Myosin regulatory light chain 12B MYL12B                                        | O14950 (+1) | 20  | 54   | 36   | 30   | 36   | 0.67    | 0.56    | 0.67    |
| 1186 | Myosin-10 MYH10                                                                 | P35580      | 229 | 75   | 53   | 66   | 57   | 0.71    | 0.88    | 0.76    |
| 1187 | Myosin-9 MYH9                                                                   | P35579      | 227 | 959  | 1127 | 1094 | 1129 | 1.18    | 1.14    | 1.18    |
| 1188 | Myotrophin MTPN                                                                 | P58546      | 13  | 14   | 12   | 10   | 13   | 0.86    | 0.71    | 0.93    |
| 1189 | Myristoylated alanine-rich C-kinase substrate MARCKS                            | P29966      | 32  | 9    | 7    | 16   | 15   | 0.78    | 1.78    | 1.67    |
| 1190 | N(4)-(beta-N-acetylglucosaminy)-L-asparaginase AGA                              | P20933      | 37  | 2    | 0    | 0    | 0    | 0.00    | 0.00    | 0.00    |
| 1191 | Na(+)/H(+) exchange regulatory cofactor NHE-RF1 SLC9A3R1                        | O14745      | 39  | 0    | 0    | 0    | 4    | #DIV/0! | #DIV/0! | #DIV/0! |
| 1192 | N-acetyl-D-glucosamine kinase NAGK                                              | Q9UJ70      | 37  | 19   | 23   | 25   | 19   | 1.21    | 1.32    | 1.00    |
| 1193 | N-acetylglucosamine-6-sulfatase GNS                                             | P15586      | 62  | 4    | 0    | 0    | 4    | 0.00    | 0.00    | 1.00    |
| 1194 | NAD(P)H dehydrogenase [quinone] 1 NQO1                                          | P15559      | 31  | 18   | 23   | 21   | 24   | 1.28    | 1.17    | 1.33    |
| 1195 | NAD(P)H-hydrate epimerase APOA1BP                                               | Q8NCW5      | 32  | 4    | 5    | 3    | 3    | 1.25    | 0.75    | 0.75    |
| 1196 | NADH dehydrogenase [ubiquinone] 1 alpha subcomplex subunit 13 NDUFA13           | Q9P0U0      | 17  | 4    | 0    | 0    | 4    | 0.00    | 0.00    | 1.00    |
| 1197 | NADH dehydrogenase [ubiquinone] 1 alpha subcomplex subunit 5 NDUFA5             | Q16718      | 13  | 2    | 0    | 0    | 2    | 0.00    | 0.00    | 1.00    |
| 1198 | NADH dehydrogenase [ubiquinone] 2 alpha subcomplex subunit 6 NDUFA6             | P56556      | 18  | 0    | 0    | 3    | 0    | #DIV/0! | #DIV/0! | #DIV/0! |
| 1199 | NADH dehydrogenase [ubiquinone] iron-sulfur protein 3, mitochondrial NDUFS3     | O75489      | 30  | 0    | 7    | 13   | 8    | #DIV/0! | #DIV/0! | #DIV/0! |
| 1200 | NADH dehydrogenase [ubiquinone] iron-sulfur protein 8, mitochondrial NDUFS8     | O00217      | 24  | 2    | 0    | 0    | 0    | 0.00    | 0.00    | 0.00    |
| 1201 | NADH-cytochrome b5 reductase 1 CYB5R1                                           | Q9UHQ9      | 34  | 5    | 7    | 2    | 2    | 1.40    | 0.40    | 0.40    |
| 1202 | NADH-cytochrome b5 reductase 3 CYB5R3                                           | P00387      | 34  | 32   | 34   | 31   | 33   | 1.06    | 0.97    | 1.03    |
| 1203 | NADH-ubiquinone oxidoreductase 75 kDa subunit, mitochondrial NDUFS1             | P28331      | 79  | 0    | 0    | 0    | 5    | #DIV/0! | #DIV/0! | #DIV/0! |
| 1204 | NADP-dependent malic enzyme ME1                                                 | P48163      | 64  | 7    | 5    | 7    | 8    | 0.71    | 1.00    | 1.14    |
| 1205 | NADPH-cytochrome P450 reductase POR                                             | P16435      | 77  | 8    | 13   | 20   | 19   | 1.63    | 2.50    | 2.38    |
| 1206 | N-alpha-acetyltransferase 10 NAA10                                              | P41227      | 26  | 11   | 9    | 9    | 12   | 0.82    | 0.82    | 1.09    |
| 1207 | N-alpha-acetyltransferase 15, NatA auxiliary subunit NAA15                      | Q9BXJ9      | 101 | 24   | 34   | 35   | 27   | 1.42    | 1.46    | 1.13    |
| 1208 | N-alpha-acetyltransferase 25, NatB auxiliary subunit NAA25                      | Q14CX7      | 112 | 0    | 2    | 0    | 0    | #DIV/0! | #DIV/0! | #DIV/0! |
| 1209 | N-alpha-acetyltransferase 50 NAA50                                              | Q9GZ11      | 19  | 21   | 13   | 15   | 11   | 0.62    | 0.71    | 0.52    |
| 1210 | Nardilysin NRD1                                                                 | O43847      | 132 | 8    | 14   | 16   | 12   | 1.75    | 2.00    | 1.50    |
| 1211 | Nascent polypeptide-associated complex subunit alpha, muscle-specific form NACA | E9PAV3      | 205 | 14   | 9    | 12   | 12   | 0.64    | 0.86    | 0.86    |
| 1212 | Nck-associated protein 1 NCKAP1                                                 | Q9Y2A7      | 129 | 27   | 27   | 13   | 29   | 1.00    | 0.48    | 1.07    |
| 1213 | NEDD8 NEDD8                                                                     | Q15843      | 9   | 6    | 6    | 6    | 6    | 1.00    | 1.00    | 1.00    |
| 1214 | NEDD8-activating enzyme E1 regulatory subunit NAE1                              | Q13564      | 60  | 5    | 6    | 6    | 5    | 1.20    | 1.20    | 1.00    |
| 1215 | NEDD8-conjugating enzyme Ubc12 UBE2M                                            | P61081      | 21  | 11   | 9    | 9    | 10   | 0.82    | 0.82    | 0.91    |
| 1216 | Neuroblast differentiation-associated protein AHNAK AHNAK                       | Q09666      | 629 | 1012 | 1071 | 1169 | 1099 | 1.06    | 1.16    | 1.09    |
| 1217 | Neuroblastoma-amplified sequence NBAS                                           | A2RRP1      | 269 | 0    | 4    | 0    | 2    | #DIV/0! | #DIV/0! | #DIV/0! |
| 1218 | Neurolysin, mitochondrial NLN                                                   | Q98YT8      | 81  | 0    | 0    | 5    | 6    | #DIV/0! | #DIV/0! | #DIV/0! |
| 1219 | Neutral alpha-glucosidase AB GANAB                                              | Q14697      | 107 | 144  | 117  | 117  | 97   | 0.81    | 0.81    | 0.67    |
| 1220 | Neutral amino acid transporter B(0) SLC1A5                                      | Q15758      | 57  | 8    | 7    | 2    | 3    | 0.88    | 0.25    | 0.38    |
| 1221 | Neutral cholesterol ester hydrolase 1 NCEH1                                     | Q6PIU2      | 46  | 3    | 0    | 7    | 2    | 0.00    | 2.33    | 0.67    |
| 1222 | Neutrophil gelatinase-associated lipocalin LCN2                                 | P80188      | 23  | 0    | 2    | 0    | 0    | #DIV/0! | #DIV/0! | #DIV/0! |
| 1223 | NHP2-like protein 1 NHP2L1                                                      | P55769      | 14  | 8    | 3    | 8    | 7    | 0.38    | 1.00    | 0.88    |
| 1224 | Niban-like protein 1 FAM129B                                                    | Q96TA1      | 84  | 33   | 32   | 32   | 30   | 0.97    | 0.97    | 0.91    |
| 1225 | Nicastrin NCSTN                                                                 | Q92542      | 78  | 2    | 2    | 0    | 5    | 1.00    | 0.00    | 2.50    |
| 1226 | Nicotinamide N-methyltransferase NMNT                                           | P40261      | 30  | 2    | 7    | 3    | 0    | 3.50    | 1.50    | 0.00    |
| 1227 | Nicotinamide phosphoribosyltransferase NAMPT                                    | P43490      | 56  | 73   | 51   | 52   | 57   | 0.70    | 0.71    | 0.78    |

|      |                                                                     |             |     |     |     |     |     |         |         |         |
|------|---------------------------------------------------------------------|-------------|-----|-----|-----|-----|-----|---------|---------|---------|
| 1228 | Nicotinate phosphoribosyltransferase NAPRT                          | Q6XQN6      | 58  | 0   | 6   | 8   | 5   | #DIV/0! | #DIV/0! | #DIV/0! |
| 1229 | Niemann-Pick C1 protein NPC1                                        | O15118      | 142 | 3   | 0   | 6   | 3   | 0.00    | 2.00    | 1.00    |
| 1230 | Nodal modulator 3 NOMO3                                             | P69849 (+2) | 134 | 6   | 0   | 0   | 3   | 0.00    | 0.00    | 0.50    |
| 1231 | Non-histone chromosomal protein HMG-14 HMGN1                        | P05114      | 11  | 2   | 2   | 3   | 2   | 1.00    | 1.50    | 1.00    |
| 1232 | Non-POU domain-containing octamer-binding protein NONO              | Q15233      | 54  | 6   | 9   | 11  | 13  | 1.50    | 1.83    | 2.17    |
| 1233 | Non-specific lipid-transfer protein SCP2                            | P22307      | 59  | 27  | 10  | 17  | 13  | 0.37    | 0.63    | 0.48    |
| 1234 | Non-syndromic hearing impairment protein 5 DFNA5                    | O60443      | 55  | 14  | 16  | 17  | 13  | 1.14    | 1.21    | 0.93    |
| 1235 | NSFL1 cofactor p47 NSFL1C                                           | Q9UN22      | 41  | 6   | 10  | 12  | 8   | 1.67    | 2.00    | 1.33    |
| 1236 | N-terminal Xaa-Pro-Lys N-methyltransferase 1 NTMT1                  | Q9BV86      | 25  | 3   | 2   | 4   | 0   | 0.67    | 1.33    | 0.00    |
| 1237 | Nuclear cap-binding protein subunit 1 NCBP1                         | Q09161      | 92  | 4   | 6   | 7   | 8   | 1.50    | 1.75    | 2.00    |
| 1238 | Nuclear factor NF-kappa-B p100 subunit NFKB2                        | Q00653      | 97  | 4   | 2   | 2   | 0   | 0.50    | 0.50    | 0.00    |
| 1239 | Nuclear factor NF-kappa-B p105 subunit NFKB1                        | P19838      | 105 | 0   | 0   | 3   | 0   | #DIV/0! | #DIV/0! | #DIV/0! |
| 1240 | Nuclear migration protein nudC NUDC                                 | Q9Y266      | 38  | 20  | 18  | 18  | 22  | 0.90    | 0.90    | 1.10    |
| 1241 | Nuclear pore complex protein Nup133 NUP133                          | Q8WUM0      | 129 | 2   | 7   | 6   | 7   | 3.50    | 3.00    | 3.50    |
| 1242 | Nuclear pore complex protein Nup155 NUP155                          | O75694      | 155 | 4   | 6   | 9   | 11  | 1.50    | 2.25    | 2.75    |
| 1243 | Nuclear pore complex protein Nup160 NUP160                          | Q12769      | 162 | 2   | 6   | 7   | 7   | 3.00    | 3.50    | 3.50    |
| 1244 | Nuclear pore complex protein Nup205 NUP205                          | Q92621      | 228 | 6   | 17  | 14  | 13  | 2.83    | 2.33    | 2.17    |
| 1245 | Nuclear pore complex protein Nup85 NUP85                            | Q9BW27      | 75  | 2   | 4   | 0   | 7   | 2.00    | 0.00    | 3.50    |
| 1246 | Nuclear pore complex protein Nup93 NUP93                            | Q8N1F7      | 93  | 16  | 13  | 16  | 16  | 0.81    | 1.00    | 1.00    |
| 1247 | Nuclear pore complex protein Nup98-Nup96 NUP98                      | P52948      | 198 | 0   | 2   | 2   | 0   | #DIV/0! | #DIV/0! | #DIV/0! |
| 1248 | Nuclear protein localization protein 4 homolog NPLOC4               | Q8TAT6      | 68  | 9   | 11  | 16  | 12  | 1.22    | 1.78    | 1.33    |
| 1249 | Nuclear receptor 2C2-associated protein NR2C2AP                     | Q86WQ0      | 16  | 0   | 0   | 4   | 0   | #DIV/0! | #DIV/0! | #DIV/0! |
| 1250 | Nuclear receptor-binding protein NRBP1                              | Q09UHY      | 60  | 6   | 2   | 7   | 9   | 0.33    | 1.17    | 1.50    |
| 1251 | Nuclear transport factor 2 NUTF2                                    | P61970      | 14  | 17  | 9   | 10  | 12  | 0.53    | 0.59    | 0.71    |
| 1252 | Nuclease-sensitive element-binding protein 1 YBX1                   | P67809      | 36  | 26  | 25  | 23  | 28  | 0.96    | 0.88    | 1.08    |
| 1253 | Nucleobindin-1 NUCB1                                                | Q02818      | 54  | 11  | 5   | 4   | 8   | 0.45    | 0.36    | 0.73    |
| 1254 | Nucleolar and coiled-body phosphoprotein 1 NOLC1                    | Q14978      | 74  | 4   | 0   | 0   | 0   | 0.00    | 0.00    | 0.00    |
| 1255 | Nucleolar protein 56 NOP56                                          | O00567      | 66  | 0   | 5   | 8   | 7   | #DIV/0! | #DIV/0! | #DIV/0! |
| 1256 | Nucleolar protein 58 NOP58                                          | Q9Y2X3      | 60  | 0   | 0   | 3   | 3   | #DIV/0! | #DIV/0! | #DIV/0! |
| 1257 | Nucleolar RNA helicase 2 DDX21                                      | Q9NR30      | 87  | 2   | 2   | 0   | 3   | 1.00    | 0.00    | 1.50    |
| 1258 | Nucleolin NCL                                                       | P19338      | 77  | 84  | 83  | 69  | 76  | 0.99    | 0.82    | 0.90    |
| 1259 | Nucleophosmin NPM1                                                  | P06748      | 33  | 43  | 46  | 51  | 38  | 1.07    | 1.19    | 0.88    |
| 1260 | Nucleoplasmin-3 NPM3                                                | O75607      | 19  | 9   | 8   | 7   | 5   | 0.89    | 0.78    | 0.56    |
| 1261 | Nucleoporin NUP188 homolog NUP188                                   | Q5SR5E      | 196 | 3   | 0   | 0   | 0   | 0.00    | 0.00    | 0.00    |
| 1262 | Nucleoporin Nup43 NUP43                                             | Q8NFF3      | 42  | 0   | 0   | 0   | 3   | #DIV/0! | #DIV/0! | #DIV/0! |
| 1263 | Nucleoporin p54 NUP54                                               | Q7Z3B4      | 55  | 0   | 0   | 0   | 2   | #DIV/0! | #DIV/0! | #DIV/0! |
| 1264 | Nucleoprotein TPR TPR                                               | P12270      | 267 | 18  | 16  | 16  | 21  | 0.89    | 0.89    | 1.17    |
| 1265 | Nucleoredoxin NXN                                                   | Q6DKJ4      | 48  | 11  | 9   | 10  | 9   | 0.82    | 0.91    | 0.82    |
| 1266 | Nucleoside diphosphate kinase A NME1                                | P15531      | 17  | 59  | 42  | 58  | 62  | 0.71    | 0.98    | 1.05    |
| 1267 | Nucleoside diphosphate kinase B NME2                                | P22392      | 17  | 80  | 68  | 70  | 96  | 0.85    | 0.88    | 1.20    |
| 1268 | Nucleosome assembly protein 1-like 1 NAP1L1                         | P55209      | 45  | 14  | 12  | 9   | 10  | 0.86    | 0.64    | 0.71    |
| 1269 | Nucleosome assembly protein 1-like 4 NAP1L4                         | Q99733      | 43  | 14  | 14  | 12  | 12  | 1.00    | 0.86    | 0.86    |
| 1270 | Nucleotide exchange factor SIL1 SIL1                                | Q9H173      | 52  | 0   | 0   | 3   | 0   | #DIV/0! | #DIV/0! | #DIV/0! |
| 1271 | NudC domain-containing protein 3 NUDCD3                             | Q8IVD9      | 41  | 5   | 2   | 4   | 4   | 0.40    | 0.80    | 0.80    |
| 1272 | Obg-like ATPase 1 OLA1                                              | Q9NTK5      | 45  | 23  | 18  | 18  | 21  | 0.78    | 0.78    | 0.91    |
| 1273 | OCIA domain-containing protein 2 OCIAD2                             | Q56VL3      | 17  | 16  | 13  | 10  | 13  | 0.81    | 0.63    | 0.81    |
| 1274 | Oligoribonuclease, mitochondrial REXO2                              | Q9Y3B8      | 27  | 3   | 6   | 0   | 5   | 2.00    | 0.00    | 1.67    |
| 1275 | Omega-amidase NIT2 NIT2                                             | Q9NQR4      | 31  | 18  | 16  | 18  | 15  | 0.89    | 1.00    | 0.83    |
| 1276 | Optineurin OPTN                                                     | Q96CV9      | 66  | 0   | 5   | 5   | 4   | #DIV/0! | #DIV/0! | #DIV/0! |
| 1277 | ORM1-like protein 2 ORMDL2                                          | Q53FV1      | 17  | 4   | 0   | 2   | 0   | 0.00    | 0.50    | 0.00    |
| 1278 | ORM1-like protein 3 ORMDL3                                          | Q8N138      | 17  | 3   | 3   | 0   | 6   | 1.00    | 0.00    | 2.00    |
| 1279 | Ornithine aminotransferase, mitochondrial OAT                       | P04181      | 49  | 41  | 32  | 28  | 29  | 0.78    | 0.68    | 0.71    |
| 1280 | Osteoclast-stimulating factor 1 OSTF1                               | Q92882      | 24  | 7   | 8   | 9   | 7   | 1.14    | 1.29    | 1.00    |
| 1281 | OTU domain-containing protein 6B OTUD6B                             | Q8N6M0      | 34  | 0   | 0   | 0   | 2   | #DIV/0! | #DIV/0! | #DIV/0! |
| 1282 | Ovarian cancer-associated gene 2 protein OVCA2                      | Q8WZ82      | 24  | 5   | 7   | 11  | 7   | 1.40    | 2.20    | 1.40    |
| 1283 | Oxidoreductase HTATIP2 HTATIP2                                      | Q9BUP3      | 27  | 0   | 5   | 2   | 0   | #DIV/0! | #DIV/0! | #DIV/0! |
| 1284 | Oxygen-dependent coproporphyrinogen-III oxidase, mitochondrial CPOX | P36551      | 50  | 2   | 6   | 4   | 3   | 3.00    | 2.00    | 1.50    |
| 1285 | Oxysterol-binding protein 1 OSBP                                    | P22059      | 89  | 5   | 9   | 4   | 6   | 1.80    | 0.80    | 1.20    |
| 1286 | Oxysterol-binding protein-related protein 3 OSBPL3                  | Q9H4L5      | 101 | 0   | 6   | 3   | 0   | #DIV/0! | #DIV/0! | #DIV/0! |
| 1287 | Oxysterol-binding protein-related protein 8 OSBPL8                  | Q9BZF1      | 101 | 5   | 3   | 5   | 0   | 0.60    | 1.00    | 0.00    |
| 1288 | Palladin PALLD                                                      | Q8WX93      | 151 | 27  | 35  | 27  | 28  | 1.30    | 1.00    | 1.04    |
| 1289 | Parafibromin CDC73                                                  | Q6P1J9      | 61  | 0   | 3   | 0   | 0   | #DIV/0! | #DIV/0! | #DIV/0! |
| 1290 | Parathyrosin PTMS                                                   | P20962      | 12  | 0   | 5   | 4   | 0   | #DIV/0! | #DIV/0! | #DIV/0! |
| 1291 | Partner of Y14 and mago WIBG                                        | Q9BRP8      | 23  | 0   | 2   | 3   | 2   | #DIV/0! | #DIV/0! | #DIV/0! |
| 1292 | Paxillin PXN                                                        | P49023      | 65  | 14  | 14  | 18  | 17  | 1.00    | 1.29    | 1.21    |
| 1293 | PDZ and LIM domain protein 1 PDLIM1                                 | O00151      | 36  | 51  | 50  | 58  | 55  | 0.98    | 1.14    | 1.08    |
| 1294 | PDZ and LIM domain protein 2 PDLIM2                                 | Q96JV6      | 37  | 0   | 0   | 3   | 0   | #DIV/0! | #DIV/0! | #DIV/0! |
| 1295 | PDZ and LIM domain protein 4 PDLIM4                                 | P50479      | 35  | 6   | 5   | 5   | 5   | 0.83    | 0.83    | 0.83    |
| 1296 | PDZ and LIM domain protein 5 PDLIM5                                 | Q96HC4      | 64  | 20  | 16  | 14  | 20  | 0.80    | 0.70    | 1.00    |
| 1297 | PDZ and LIM domain protein 7 PDLIM7                                 | Q9NR12      | 50  | 6   | 4   | 4   | 4   | 0.67    | 0.67    | 0.67    |
| 1298 | PDZ domain-containing protein GIPC1 GIPC1                           | O14908      | 36  | 26  | 21  | 16  | 18  | 0.81    | 0.62    | 0.69    |
| 1299 | Peflin PEF1                                                         | Q9UBV8      | 30  | 4   | 4   | 8   | 3   | 1.00    | 2.00    | 0.75    |
| 1300 | Peptidyl-prolyl cis-trans isomerase A PPIA                          | P62937      | 18  | 142 | 118 | 126 | 162 | 0.83    | 0.89    | 1.14    |
| 1301 | Peptidyl-prolyl cis-trans isomerase B PPIB                          | P23284      | 24  | 77  | 88  | 85  | 80  | 1.14    | 1.10    | 1.04    |
| 1302 | Peptidyl-prolyl cis-trans isomerase C PPIIC                         | P45877      | 23  | 4   | 8   | 3   | 3   | 2.00    | 0.75    | 0.75    |
| 1303 | Peptidyl-prolyl cis-trans isomerase D PPIID                         | Q08752      | 41  | 0   | 2   | 3   | 3   | #DIV/0! | #DIV/0! | #DIV/0! |
| 1304 | Peptidyl-prolyl cis-trans isomerase F, mitochondrial PPIF           | P30405      | 22  | 0   | 2   | 0   | 0   | #DIV/0! | #DIV/0! | #DIV/0! |
| 1305 | Peptidyl-prolyl cis-trans isomerase FKBP10 FKBP10                   | Q96AY3      | 64  | 0   | 0   | 4   | 4   | #DIV/0! | #DIV/0! | #DIV/0! |
| 1306 | Peptidyl-prolyl cis-trans isomerase FKBP1A FKBP1A                   | P62942      | 12  | 17  | 15  | 12  | 11  | 0.88    | 0.71    | 0.65    |
| 1307 | Peptidyl-prolyl cis-trans isomerase FKBP2 FKBP2                     | P26885      | 16  | 11  | 3   | 10  | 11  | 0.27    | 0.91    | 1.00    |
| 1308 | Peptidyl-prolyl cis-trans isomerase FKBP3 FKBP3                     | Q00688      | 25  | 11  | 12  | 11  | 10  | 1.09    | 1.00    | 0.91    |
| 1309 | Peptidyl-prolyl cis-trans isomerase FKBP4 FKBP4                     | Q02790      | 52  | 49  | 40  | 33  | 47  | 0.82    | 0.67    | 0.96    |

|      |                                                                       |        |     |     |     |     |     |         |         |         |
|------|-----------------------------------------------------------------------|--------|-----|-----|-----|-----|-----|---------|---------|---------|
| 1310 | Peptidyl-prolyl cis-trans isomerase FKBP5 FKBP5                       | Q13451 | 51  | 2   | 7   | 5   | 5   | 3.50    | 2.50    | 2.50    |
| 1311 | Peptidyl-prolyl cis-trans isomerase FKBP9 FKBP9                       | O95302 | 63  | 3   | 3   | 4   | 5   | 1.00    | 1.33    | 1.67    |
| 1312 | Peptidyl-prolyl cis-trans isomerase H PPIH                            | O43447 | 19  | 3   | 5   | 3   | 3   | 1.67    | 1.00    | 1.00    |
| 1313 | Peptidyl-prolyl cis-trans isomerase NIMA-interacting 1 PIN1           | Q13526 | 18  | 2   | 0   | 3   | 0   | 0.00    | 1.50    | 0.00    |
| 1314 | Peptidyl-prolyl cis-trans isomerase-like 1 PPII1                      | Q9Y3C6 | 18  | 5   | 4   | 4   | 2   | 0.80    | 0.80    | 0.40    |
| 1315 | Peptidyl-prolyl cis-trans isomerase-like 3 PPII3                      | Q9H2H8 | 18  | 0   | 3   | 3   | 0   | #DIV/0! | #DIV/0! | #DIV/0! |
| 1316 | Peptidyl-tRNA hydrolase 2, mitochondrial PTRH2                        | Q9Y3E5 | 19  | 5   | 0   | 0   | 0   | 0.00    | 0.00    | 0.00    |
| 1317 | Perilipin-3 PLIN3                                                     | O60664 | 47  | 16  | 15  | 19  | 21  | 0.94    | 1.19    | 1.31    |
| 1318 | Periplakin PPL                                                        | O60437 | 205 | 12  | 11  | 13  | 12  | 0.92    | 1.08    | 1.00    |
| 1319 | Peroxiredoxin-1 PRDX1                                                 | Q06830 | 22  | 117 | 138 | 130 | 102 | 1.18    | 1.11    | 0.87    |
| 1320 | Peroxiredoxin-2 PRDX2                                                 | P32119 | 22  | 63  | 52  | 57  | 55  | 0.83    | 0.90    | 0.87    |
| 1321 | Peroxiredoxin-4 PRDX4                                                 | Q13162 | 31  | 45  | 41  | 44  | 46  | 0.91    | 0.98    | 1.02    |
| 1322 | Peroxiredoxin-5, mitochondrial PRDX5                                  | P30044 | 22  | 50  | 54  | 53  | 55  | 1.08    | 1.06    | 1.10    |
| 1323 | Peroxiredoxin-6 PRDX6                                                 | P30041 | 25  | 57  | 64  | 65  | 72  | 1.12    | 1.14    | 1.26    |
| 1324 | Peroxisomal acyl-coenzyme A oxidase 1 ACOX1                           | Q15067 | 74  | 4   | 3   | 0   | 0   | 0.75    | 0.00    | 0.00    |
| 1325 | Peroxisomal multifunctional enzyme type 2 HSD17B4                     | P51659 | 80  | 3   | 4   | 5   | 5   | 1.33    | 1.67    | 1.67    |
| 1326 | PERQ amino acid-rich with GYF domain-containing protein 2 GIGYF2      | Q67VW6 | 150 | 0   | 0   | 4   | 4   | #DIV/0! | #DIV/0! | #DIV/0! |
| 1327 | Persulfide dioxygenase ETHE1, mitochondrial ETHE1                     | O95571 | 28  | 16  | 20  | 18  | 24  | 1.25    | 1.13    | 1.50    |
| 1328 | Pescadillo homolog PES1                                               | O00541 | 68  | 0   | 3   | 5   | 5   | #DIV/0! | #DIV/0! | #DIV/0! |
| 1329 | PHD finger-like domain-containing protein 5A PHF5A                    | Q7RTV0 | 12  | 6   | 7   | 7   | 9   | 1.17    | 1.17    | 1.50    |
| 1330 | Phenylalanine--tRNA ligase alpha subunit FARSA                        | Q9Y285 | 58  | 2   | 6   | 9   | 7   | 3.00    | 4.50    | 3.50    |
| 1331 | Phenylalanine--tRNA ligase beta subunit FARSB                         | Q9NSD9 | 66  | 11  | 17  | 18  | 19  | 1.55    | 1.64    | 1.73    |
| 1332 | Phosducin-like protein 3 PDCL3                                        | Q9H2H4 | 28  | 7   | 13  | 9   | 16  | 1.86    | 1.29    | 2.29    |
| 1333 | Phosphate carrier protein, mitochondrial SLC25A3                      | Q00325 | 40  | 10  | 19  | 13  | 23  | 1.90    | 1.30    | 2.30    |
| 1334 | Phosphatidylethanolamine-binding protein 1 PEBP1                      | P30086 | 21  | 53  | 44  | 42  | 36  | 0.83    | 0.79    | 0.68    |
| 1335 | Phosphatidylinositol phosphatase SAC1 SACM1L                          | Q9NTJ5 | 67  | 2   | 0   | 0   | 0   | 0.00    | 0.00    | 0.00    |
| 1336 | Phosphatidylinositol 5-phosphate 4-kinase type-2 gamma PIP4K2C        | Q8TBX8 | 47  | 6   | 9   | 11  | 4   | 1.50    | 1.83    | 0.67    |
| 1337 | Phosphatidylinositol transfer protein alpha isoform PIPNA             | Q00169 | 32  | 8   | 14  | 10  | 8   | 1.75    | 1.25    | 1.00    |
| 1338 | Phosphatidylinositol transfer protein beta isoform PIPNB              | P48739 | 32  | 21  | 21  | 24  | 19  | 1.00    | 1.14    | 0.90    |
| 1339 | Phosphatidylinositol-binding clathrin assembly protein PICALM         | Q13492 | 71  | 7   | 9   | 6   | 8   | 1.29    | 0.86    | 1.14    |
| 1340 | Phosphoacetylglucosamine mutase PGM3                                  | O95394 | 60  | 13  | 13  | 15  | 20  | 1.00    | 1.15    | 1.54    |
| 1341 | Phosphoenolpyruvate carboxykinase [GTP], mitochondrial PCK2           | Q16822 | 71  | 5   | 5   | 11  | 7   | 1.00    | 2.20    | 1.40    |
| 1342 | Phosphoglucomutase-1 PGM1                                             | P36871 | 61  | 22  | 21  | 23  | 13  | 0.95    | 1.05    | 0.59    |
| 1343 | Phosphoglucomutase-2 PGM2                                             | Q96G03 | 68  | 10  | 21  | 24  | 28  | 2.10    | 2.40    | 2.80    |
| 1344 | Phosphoglycerate kinase 1 PGK1                                        | P00558 | 45  | 160 | 191 | 175 | 152 | 1.19    | 1.09    | 0.95    |
| 1345 | Phosphoglycerate mutase 1 PGAM1                                       | P18669 | 29  | 122 | 136 | 112 | 128 | 1.11    | 0.92    | 1.05    |
| 1346 | Phosphoglycolate phosphatase PGP                                      | A6NDG6 | 34  | 2   | 0   | 4   | 3   | 0.00    | 2.00    | 1.50    |
| 1347 | Phospholipase A-2-activating protein PLAA                             | Q9Y263 | 87  | 0   | 0   | 3   | 0   | #DIV/0! | #DIV/0! | #DIV/0! |
| 1348 | Phospholipase D3 PLD3                                                 | Q8IV08 | 55  | 0   | 3   | 0   | 0   | #DIV/0! | #DIV/0! | #DIV/0! |
| 1349 | Phospholipid hydroperoxide glutathione peroxidase, mitochondrial GPX4 | P36969 | 22  | 8   | 5   | 3   | 0   | 0.63    | 0.38    | 0.00    |
| 1350 | Phosphomannomutase 2 PMM2                                             | O15305 | 28  | 9   | 14  | 11  | 9   | 1.56    | 1.22    | 1.00    |
| 1351 | Phosphomevalonate kinase PMVK                                         | Q15126 | 22  | 0   | 3   | 0   | 0   | #DIV/0! | #DIV/0! | #DIV/0! |
| 1352 | Phosphopantothenate--cysteine ligase PPCS                             | Q9HAB8 | 34  | 5   | 4   | 0   | 0   | 0.80    | 0.00    | 0.00    |
| 1353 | Phosphoribosyl pyrophosphate synthase-associated protein 2 PRPSAP2    | O60256 | 41  | 3   | 2   | 0   | 0   | 0.67    | 0.00    | 0.00    |
| 1354 | Phosphoribosylformylglycinamide synthase PFAS                         | O15067 | 145 | 0   | 4   | 10  | 6   | #DIV/0! | #DIV/0! | #DIV/0! |
| 1355 | Phosphoserine aminotransferase PSAT1                                  | Q9Y617 | 40  | 21  | 10  | 25  | 27  | 0.48    | 1.19    | 1.29    |
| 1356 | Phosphoserine phosphatase PSPH                                        | P78330 | 25  | 0   | 3   | 0   | 0   | #DIV/0! | #DIV/0! | #DIV/0! |
| 1357 | Phostensin PPP1R18                                                    | Q6NYC8 | 68  | 0   | 0   | 2   | 2   | #DIV/0! | #DIV/0! | #DIV/0! |
| 1358 | Pirin PIR                                                             | O00625 | 32  | 0   | 0   | 3   | 0   | #DIV/0! | #DIV/0! | #DIV/0! |
| 1359 | PITH domain-containing protein 1 PITHD1                               | Q9GZP4 | 24  | 7   | 5   | 3   | 3   | 0.71    | 0.43    | 0.43    |
| 1360 | Plakophilin-1 PKP1                                                    | Q13835 | 83  | 3   | 3   | 0   | 0   | 1.00    | 0.00    | 0.00    |
| 1361 | Plakophilin-3 PKP3                                                    | Q9Y446 | 87  | 3   | 3   | 5   | 5   | 1.00    | 1.67    | 1.67    |
| 1362 | Plasma alpha-L-fucosidase FUCA2                                       | Q9BTY2 | 54  | 0   | 3   | 3   | 0   | #DIV/0! | #DIV/0! | #DIV/0! |
| 1363 | Plasma membrane calcium-transporting ATPase 4 ATP2B4                  | P23634 | 138 | 4   | 5   | 3   | 2   | 1.25    | 0.75    | 0.50    |
| 1364 | Plasminogen activator inhibitor 1 SERPINE1                            | P05121 | 45  | 0   | 0   | 5   | 2   | #DIV/0! | #DIV/0! | #DIV/0! |
| 1365 | Plasminogen activator inhibitor 1 RNA-binding protein SERBP1          | Q8NC51 | 45  | 29  | 14  | 21  | 24  | 0.48    | 0.72    | 0.83    |
| 1366 | Plasminogen activator inhibitor 2 SERPINB2                            | P05120 | 47  | 29  | 33  | 13  | 20  | 1.14    | 0.45    | 0.69    |
| 1367 | Plastin-1 PLS1                                                        | Q14651 | 70  | 0   | 16  | 0   | 24  | #DIV/0! | #DIV/0! | #DIV/0! |
| 1368 | Plastin-3 PLS3                                                        | P13797 | 71  | 170 | 122 | 132 | 140 | 0.72    | 0.78    | 0.82    |
| 1369 | Platelet-activating factor acetylhydrolase IB subunit alpha PAFAH1B1  | P43034 | 47  | 8   | 7   | 12  | 11  | 0.88    | 1.50    | 1.38    |
| 1370 | Platelet-activating factor acetylhydrolase IB subunit beta PAFAH1B2   | P68402 | 26  | 15  | 10  | 9   | 12  | 0.67    | 0.60    | 0.80    |
| 1371 | Platelet-activating factor acetylhydrolase IB subunit gamma PAFAH1B3  | Q15102 | 26  | 7   | 10  | 10  | 4   | 1.43    | 1.43    | 0.57    |
| 1372 | Pleckstrin homology domain-containing family A member 1 PLEKHA1       | Q9HB21 | 46  | 3   | 0   | 3   | 0   | 0.00    | 1.00    | 0.00    |
| 1373 | Plectin PLEC                                                          | Q15149 | 532 | 968 | 993 | 895 | 937 | 1.03    | 0.92    | 0.97    |
| 1374 | Plexin-A1 PLXNA1                                                      | Q9UIW2 | 211 | 0   | 0   | 0   | 2   | #DIV/0! | #DIV/0! | #DIV/0! |
| 1375 | Plexin-B2 PLXNB2                                                      | O15031 | 205 | 0   | 0   | 0   | 3   | #DIV/0! | #DIV/0! | #DIV/0! |
| 1376 | Poliiovirus receptor PVR                                              | P15151 | 45  | 0   | 0   | 2   | 3   | #DIV/0! | #DIV/0! | #DIV/0! |
| 1377 | Poly [ADP-ribose] polymerase 4 PARP4                                  | Q9UJK3 | 193 | 11  | 10  | 11  | 8   | 0.91    | 1.00    | 0.73    |
| 1378 | Poly(ADP-ribose) glycohydrolase ARH3 ADPRHL2                          | Q9NX46 | 39  | 0   | 0   | 0   | 3   | #DIV/0! | #DIV/0! | #DIV/0! |
| 1379 | Poly(rC)-binding protein 1 PCBP1                                      | Q15365 | 37  | 39  | 46  | 44  | 45  | 1.18    | 1.13    | 1.15    |
| 1380 | Poly(rC)-binding protein 2 PCBP2                                      | Q15366 | 39  | 22  | 27  | 23  | 23  | 1.23    | 1.05    | 1.05    |
| 1381 | Poly(U)-binding-splicing factor PUF60 PUF60                           | Q9UHX1 | 60  | 11  | 14  | 8   | 10  | 1.27    | 0.73    | 0.91    |
| 1382 | Polyadenylate-binding protein 1 PABPC1                                | P11940 | 71  | 62  | 53  | 62  | 60  | 0.85    | 1.00    | 0.97    |
| 1383 | Polyadenylate-binding protein 4 PABPC4                                | Q13310 | 71  | 18  | 17  | 21  | 20  | 0.94    | 1.17    | 1.11    |
| 1384 | Polyadenylate-binding protein-interacting protein 1 PAIP1             | Q9H074 | 54  | 0   | 0   | 2   | 2   | #DIV/0! | #DIV/0! | #DIV/0! |
| 1385 | Polymerase delta-interacting protein 2 POLDIP2                        | Q9Y257 | 42  | 2   | 0   | 0   | 3   | 0.00    | 0.00    | 1.50    |
| 1386 | Polymerase I and transcript release factor PTRF                       | Q6N2I2 | 43  | 31  | 21  | 27  | 32  | 0.68    | 0.87    | 1.03    |
| 1387 | Polypeptide N-acetylgalactosaminyltransferase 2 GALNT2                | Q10471 | 65  | 10  | 7   | 6   | 5   | 0.70    | 0.60    | 0.50    |
| 1388 | Polypeptide N-acetylgalactosaminyltransferase 3 GALNT3                | Q14435 | 73  | 7   | 4   | 7   | 8   | 0.57    | 1.00    | 1.14    |
| 1389 | Polypyrimidine tract-binding protein 1 PTBP1                          | P26599 | 57  | 30  | 36  | 29  | 28  | 1.20    | 0.97    | 0.93    |
| 1390 | Porphobilinogen deaminase HMBS                                        | P08397 | 39  | 0   | 0   | 2   | 0   | #DIV/0! | #DIV/0! | #DIV/0! |
| 1391 | PRA1 family protein 2 PRAF2                                           | O60831 | 19  | 2   | 0   | 3   | 4   | 0.00    | 1.50    | 2.00    |

|      |                                                                     |        |     |     |     |     |     |         |         |         |
|------|---------------------------------------------------------------------|--------|-----|-----|-----|-----|-----|---------|---------|---------|
| 1392 | PRA1 family protein 3 ARL6IP5                                       | O75915 | 22  | 8   | 7   | 12  | 15  | 0.88    | 1.50    | 1.88    |
| 1393 | Prefoldin subunit 1 PFDN1                                           | O60925 | 14  | 6   | 2   | 0   | 0   | 0.33    | 0.00    | 0.00    |
| 1394 | Prefoldin subunit 2 PFDN2                                           | Q9UHV9 | 17  | 6   | 2   | 2   | 0   | 0.33    | 0.33    | 0.00    |
| 1395 | Prefoldin subunit 3 VBP1                                            | P61758 | 23  | 3   | 3   | 5   | 3   | 1.00    | 1.67    | 1.00    |
| 1396 | Prefoldin subunit 4 PFDN4                                           | Q9NQP4 | 15  | 0   | 0   | 0   | 3   | #DIV/0! | #DIV/0! | #DIV/0! |
| 1397 | Prefoldin subunit 5 PFDN5                                           | Q99471 | 17  | 4   | 2   | 3   | 0   | 0.50    | 0.75    | 0.00    |
| 1398 | Prefoldin subunit 6 PFDN6                                           | O15212 | 15  | 4   | 0   | 3   | 0   | 0.00    | 0.75    | 0.00    |
| 1399 | Prelamin-A/C LMNA                                                   | P02545 | 74  | 13  | 21  | 20  | 25  | 1.62    | 1.54    | 1.92    |
| 1400 | Pre-mRNA-processing factor 19 PRPF19                                | Q9UMS4 | 55  | 0   | 5   | 6   | 5   | #DIV/0! | #DIV/0! | #DIV/0! |
| 1401 | Pre-mRNA-processing factor 40 homolog A PRPF40A                     | O75400 | 109 | 0   | 4   | 3   | 4   | #DIV/0! | #DIV/0! | #DIV/0! |
| 1402 | Pre-mRNA-processing factor 6 PRPF6                                  | O94906 | 107 | 0   | 0   | 2   | 0   | #DIV/0! | #DIV/0! | #DIV/0! |
| 1403 | Pre-mRNA-processing-splicing factor 8 PRPF8                         | Q6P2Q9 | 274 | 26  | 24  | 36  | 36  | 0.92    | 1.38    | 1.38    |
| 1404 | Pre-mRNA-splicing factor ATP-dependent RNA helicase PRP16 DHX38     | Q92620 | 141 | 4   | 0   | 3   | 3   | 0.00    | 0.75    | 0.75    |
| 1405 | Prenylated Rab acceptor protein 1 RABAC1                            | Q9UI14 | 21  | 3   | 0   | 0   | 0   | 0.00    | 0.00    | 0.00    |
| 1406 | Prenylcysteine oxidase 1 PCYOX1                                     | Q9UHG3 | 57  | 13  | 10  | 13  | 10  | 0.77    | 1.00    | 0.77    |
| 1407 | Presequence protease, mitochondrial PITRM1                          | Q5JRX3 | 117 | 8   | 6   | 14  | 13  | 0.75    | 1.75    | 1.63    |
| 1408 | PRKC apoptosis WT1 regulator protein PAWR                           | O96120 | 37  | 0   | 0   | 3   | 0   | #DIV/0! | #DIV/0! | #DIV/0! |
| 1409 | Probable ATP-dependent RNA helicase DDX17 DDX17                     | Q92841 | 80  | 0   | 13  | 20  | 25  | #DIV/0! | #DIV/0! | #DIV/0! |
| 1410 | Probable ATP-dependent RNA helicase DDX23 DDX23                     | Q98UQ8 | 96  | 0   | 2   | 0   | 0   | #DIV/0! | #DIV/0! | #DIV/0! |
| 1411 | Probable ATP-dependent RNA helicase DDX46 DDX46                     | Q7L014 | 117 | 0   | 3   | 5   | 5   | #DIV/0! | #DIV/0! | #DIV/0! |
| 1412 | Probable ATP-dependent RNA helicase DDX5 DDX5                       | P17844 | 69  | 23  | 19  | 35  | 35  | 0.83    | 1.52    | 1.52    |
| 1413 | Probable ATP-dependent RNA helicase DDX6 DDX6                       | P26196 | 54  | 13  | 9   | 7   | 4   | 0.69    | 0.54    | 0.31    |
| 1414 | Probable cytosolic iron-sulfur protein assembly protein CIAO1 CIAO1 | O76071 | 38  | 0   | 0   | 2   | 0   | #DIV/0! | #DIV/0! | #DIV/0! |
| 1415 | Probable E3 ubiquitin-protein ligase HERC4 HERC4                    | Q5GLZ8 | 119 | 0   | 3   | 3   | 2   | #DIV/0! | #DIV/0! | #DIV/0! |
| 1416 | Probable tRNA(His) guanylyltransferase THG1L                        | Q9NWX6 | 35  | 2   | 2   | 0   | 0   | 1.00    | 0.00    | 0.00    |
| 1417 | Probable ubiquitin carboxyl-terminal hydrolase FAF-X USP9X          | Q93008 | 292 | 18  | 13  | 20  | 14  | 0.72    | 1.11    | 0.78    |
| 1418 | Procollagen galactosyltransferase 1 COLGALT1                        | Q8NBJ5 | 72  | 3   | 12  | 9   | 12  | 4.00    | 3.00    | 4.00    |
| 1419 | Procollagen-lysine,2-oxoglutarate 5-dioxygenase 1 PLOD1             | Q02809 | 84  | 4   | 3   | 3   | 0   | 0.75    | 0.75    | 0.00    |
| 1420 | Procollagen-lysine,2-oxoglutarate 5-dioxygenase 2 PLOD2             | O00469 | 85  | 59  | 46  | 47  | 44  | 0.78    | 0.80    | 0.75    |
| 1421 | Procollagen-lysine,2-oxoglutarate 5-dioxygenase 3 PLOD3             | O60568 | 85  | 3   | 0   | 0   | 0   | 0.00    | 0.00    | 0.00    |
| 1422 | Profilin-1 PFN1                                                     | P07737 | 15  | 168 | 156 | 169 | 178 | 0.93    | 1.01    | 1.06    |
| 1423 | Profilin-2 PFN2                                                     | P35080 | 15  | 14  | 14  | 23  | 15  | 1.00    | 1.64    | 1.07    |
| 1424 | Programmed cell death 6-interacting protein PDCD6IP                 | Q8WUM4 | 96  | 122 | 79  | 97  | 89  | 0.65    | 0.80    | 0.73    |
| 1425 | Programmed cell death protein 10 PDCD10                             | Q9BUL8 | 25  | 10  | 14  | 13  | 18  | 1.40    | 1.30    | 1.80    |
| 1426 | Programmed cell death protein 5 PDCD5                               | O14737 | 14  | 6   | 6   | 7   | 3   | 1.00    | 1.17    | 0.50    |
| 1427 | Programmed cell death protein 6 PDCD6                               | O75340 | 22  | 9   | 9   | 12  | 6   | 1.00    | 1.33    | 0.67    |
| 1428 | Prohibitin PHB                                                      | P35232 | 30  | 7   | 4   | 4   | 4   | 0.57    | 0.57    | 0.57    |
| 1429 | Prohibitin-2 PHB2                                                   | Q99623 | 33  | 9   | 9   | 8   | 6   | 1.00    | 0.89    | 0.67    |
| 1430 | Prolactin-inducible protein PIP                                     | P12273 | 17  | 2   | 6   | 3   | 0   | 3.00    | 1.50    | 0.00    |
| 1431 | Proliferating cell nuclear antigen PCNA                             | P12004 | 29  | 12  | 11  | 20  | 16  | 0.92    | 1.67    | 1.33    |
| 1432 | Proliferation-associated protein 2G4 PA2G4                          | Q9UQ80 | 44  | 22  | 26  | 28  | 22  | 1.18    | 1.27    | 1.00    |
| 1433 | Proline synthase co-transcribed bacterial homolog protein PROSC     | O94903 | 30  | 7   | 8   | 6   | 6   | 1.14    | 0.86    | 0.86    |
| 1434 | Proline-, glutamic acid- and leucine-rich protein 1 PELP1           | Q8IZL8 | 120 | 0   | 0   | 2   | 3   | #DIV/0! | #DIV/0! | #DIV/0! |
| 1435 | Proline-rich AKT1 substrate 1 AKT1S1                                | Q96B36 | 27  | 0   | 0   | 2   | 0   | #DIV/0! | #DIV/0! | #DIV/0! |
| 1436 | Prolyl 3-hydroxylase 1 LEPRE1                                       | Q32P28 | 83  | 0   | 3   | 2   | 0   | #DIV/0! | #DIV/0! | #DIV/0! |
| 1437 | Prolyl 4-hydroxylase subunit alpha-1 P4HA1                          | P13674 | 61  | 21  | 18  | 21  | 21  | 0.86    | 1.00    | 1.00    |
| 1438 | Prolyl 4-hydroxylase subunit alpha-2 P4HA2                          | O15460 | 61  | 22  | 31  | 18  | 22  | 1.41    | 0.82    | 1.00    |
| 1439 | Prolyl endopeptidase PREP                                           | P48147 | 81  | 34  | 28  | 31  | 27  | 0.82    | 0.91    | 0.79    |
| 1440 | Prosaposin PSAP                                                     | P07602 | 58  | 18  | 14  | 29  | 13  | 0.78    | 1.61    | 0.72    |
| 1441 | Prostaglandin E synthase 2 PTGES2                                   | Q9H727 | 42  | 7   | 2   | 2   | 0   | 0.29    | 0.29    | 0.00    |
| 1442 | Prostaglandin E synthase 3 PTGES3                                   | Q15185 | 19  | 17  | 18  | 14  | 22  | 1.06    | 0.82    | 1.29    |
| 1443 | Prostaglandin F2 receptor negative regulator PTGFRN                 | Q9P282 | 99  | 3   | 3   | 2   | 0   | 1.00    | 0.67    | 0.00    |
| 1444 | Prostaglandin G/H synthase 2 PTGS2                                  | P35354 | 69  | 0   | 12  | 13  | 18  | #DIV/0! | #DIV/0! | #DIV/0! |
| 1445 | Prostaglandin reductase 1 PTGR1                                     | Q14914 | 36  | 8   | 10  | 11  | 12  | 1.25    | 1.38    | 1.50    |
| 1446 | Proteasomal ubiquitin receptor ADRM1 ADRM1                          | Q16186 | 42  | 8   | 8   | 6   | 6   | 1.00    | 0.75    | 0.75    |
| 1447 | Proteasome activator complex subunit 1 PSME1                        | Q06323 | 29  | 6   | 10  | 9   | 2   | 1.67    | 1.50    | 0.33    |
| 1448 | Proteasome activator complex subunit 2 PSME2                        | Q9UL46 | 27  | 15  | 19  | 22  | 17  | 1.27    | 1.47    | 1.13    |
| 1449 | Proteasome activator complex subunit 3 PSME3                        | P61289 | 30  | 12  | 20  | 19  | 22  | 1.67    | 1.58    | 1.83    |
| 1450 | Proteasome activator complex subunit 4 PSME4                        | Q14997 | 211 | 5   | 6   | 13  | 2   | 1.20    | 2.60    | 0.40    |
| 1451 | Proteasome assembly chaperone 1 PSMG1                               | O95456 | 33  | 7   | 7   | 7   | 4   | 1.00    | 1.00    | 0.57    |
| 1452 | Proteasome assembly chaperone 2 PSMG2                               | Q969U7 | 29  | 3   | 7   | 5   | 2   | 2.33    | 1.67    | 0.67    |
| 1453 | Proteasome assembly chaperone 3 PSMG3                               | Q9BT73 | 13  | 7   | 3   | 4   | 0   | 0.43    | 0.57    | 0.00    |
| 1454 | Proteasome inhibitor PI31 subunit PSMF1                             | Q92530 | 30  | 5   | 10  | 10  | 7   | 2.00    | 2.00    | 1.40    |
| 1455 | Proteasome subunit alpha type-1 PSMA1                               | P25786 | 30  | 54  | 45  | 53  | 56  | 0.83    | 0.98    | 1.04    |
| 1456 | Proteasome subunit alpha type-2 PSMA2                               | P25787 | 26  | 29  | 32  | 41  | 31  | 1.10    | 1.41    | 1.07    |
| 1457 | Proteasome subunit alpha type-3 PSMA3                               | P25788 | 28  | 23  | 23  | 19  | 25  | 1.00    | 0.83    | 1.09    |
| 1458 | Proteasome subunit alpha type-4 PSMA4                               | P25789 | 29  | 37  | 41  | 48  | 51  | 1.11    | 1.30    | 1.38    |
| 1459 | Proteasome subunit alpha type-5 PSMA5                               | P28066 | 26  | 16  | 24  | 23  | 19  | 1.50    | 1.44    | 1.19    |
| 1460 | Proteasome subunit alpha type-6 PSMA6                               | P60900 | 27  | 39  | 45  | 44  | 47  | 1.15    | 1.13    | 1.21    |
| 1461 | Proteasome subunit alpha type-7 PSMA7                               | O14818 | 28  | 44  | 35  | 33  | 52  | 0.80    | 0.75    | 1.18    |
| 1462 | Proteasome subunit beta type-1 PSMB1                                | P20618 | 26  | 41  | 37  | 39  | 41  | 0.90    | 0.95    | 1.00    |
| 1463 | Proteasome subunit beta type-2 PSMB2                                | P49721 | 23  | 26  | 26  | 28  | 32  | 1.00    | 1.08    | 1.23    |
| 1464 | Proteasome subunit beta type-3 PSMB3                                | P49720 | 23  | 24  | 25  | 31  | 22  | 1.04    | 1.29    | 0.92    |
| 1465 | Proteasome subunit beta type-4 PSMB4                                | P28070 | 29  | 32  | 32  | 34  | 23  | 1.00    | 1.06    | 0.72    |
| 1466 | Proteasome subunit beta type-5 PSMB5                                | P28074 | 28  | 44  | 45  | 45  | 40  | 1.02    | 1.02    | 0.91    |
| 1467 | Proteasome subunit beta type-6 PSMB6                                | P28072 | 25  | 16  | 17  | 21  | 19  | 1.06    | 1.31    | 1.19    |
| 1468 | Proteasome subunit beta type-7 PSMB7                                | Q99436 | 30  | 17  | 27  | 21  | 26  | 1.59    | 1.24    | 1.53    |
| 1469 | Proteasome subunit beta type-8 PSMB8                                | P28062 | 30  | 0   | 5   | 8   | 0   | #DIV/0! | #DIV/0! | #DIV/0! |
| 1470 | Proteasome-associated protein ECM29 homolog ECM29                   | Q5VYK3 | 204 | 8   | 15  | 20  | 12  | 1.88    | 2.50    | 1.50    |
| 1471 | Protein AHNAK2 AHNAK2                                               | Q8IVF2 | 617 | 55  | 46  | 47  | 47  | 0.84    | 0.85    | 0.85    |
| 1472 | Protein arginine N-methyltransferase 1 PRMT1                        | Q99873 | 42  | 8   | 9   | 7   | 10  | 1.13    | 0.88    | 1.25    |
| 1473 | Protein arginine N-methyltransferase 5 PRMT5                        | O14744 | 73  | 8   | 12  | 11  | 8   | 1.50    | 1.38    | 1.00    |

|      |                                                                                 |        |     |     |     |     |     |         |         |         |
|------|---------------------------------------------------------------------------------|--------|-----|-----|-----|-----|-----|---------|---------|---------|
| 1474 | Protein bicaudal D homolog 2 BICD2                                              | Q8TD16 | 94  | 10  | 11  | 11  | 7   | 1.10    | 1.10    | 0.70    |
| 1475 | Protein BRICK1 BRK1                                                             | Q8WUW1 | 9   | 5   | 7   | 6   | 4   | 1.40    | 1.20    | 0.80    |
| 1476 | Protein C10 C12orf57                                                            | Q99622 | 13  | 6   | 2   | 0   | 0   | 0.33    | 0.00    | 0.00    |
| 1477 | Protein canopy homolog 2 CNPY2                                                  | Q9Y280 | 21  | 3   | 2   | 0   | 3   | 0.67    | 0.00    | 1.00    |
| 1478 | Protein CDV3 homolog CDV3                                                       | Q9UKY7 | 27  | 7   | 0   | 2   | 2   | 0.00    | 0.29    | 0.29    |
| 1479 | Protein diaphanous homolog 1 DIAPH1                                             | O60610 | 141 | 60  | 73  | 78  | 77  | 1.22    | 1.30    | 1.28    |
| 1480 | Protein disulfide-isomerase P4HB                                                | P07237 | 57  | 180 | 159 | 129 | 129 | 0.88    | 0.72    | 0.72    |
| 1481 | Protein disulfide-isomerase A3 PDIA3                                            | P30101 | 57  | 156 | 136 | 118 | 126 | 0.87    | 0.76    | 0.81    |
| 1482 | Protein disulfide-isomerase A4 PDIA4                                            | P13667 | 73  | 91  | 84  | 87  | 87  | 0.92    | 0.96    | 0.96    |
| 1483 | Protein disulfide-isomerase A6 PDIA6                                            | Q15084 | 48  | 64  | 67  | 62  | 67  | 1.05    | 0.97    | 1.05    |
| 1484 | Protein disulfide-isomerase TMX3 TMX3                                           | Q96J7  | 52  | 0   | 0   | 2   | 0   | #DIV/0! | #DIV/0! | #DIV/0! |
| 1485 | Protein DJ-1 PARK7                                                              | Q99497 | 20  | 53  | 58  | 51  | 59  | 1.09    | 0.96    | 1.11    |
| 1486 | Protein ERGIC-53 LMAN1                                                          | P49257 | 58  | 0   | 8   | 2   | 7   | #DIV/0! | #DIV/0! | #DIV/0! |
| 1487 | Protein FAM127A FAM127A                                                         | A62K13 | 13  | 5   | 3   | 6   | 0   | 0.60    | 1.20    | 0.00    |
| 1488 | Protein FAM162A FAM162A                                                         | Q96A26 | 17  | 0   | 3   | 5   | 5   | #DIV/0! | #DIV/0! | #DIV/0! |
| 1489 | Protein FAM3C FAM3C                                                             | Q92520 | 25  | 5   | 0   | 0   | 0   | 0.00    | 0.00    | 0.00    |
| 1490 | Protein FAM49B FAM49B                                                           | Q9NUQ9 | 37  | 8   | 16  | 11  | 9   | 2.00    | 1.38    | 1.13    |
| 1491 | Protein FAM91A1 FAM91A1                                                         | Q658Y4 | 94  | 0   | 3   | 3   | 2   | #DIV/0! | #DIV/0! | #DIV/0! |
| 1492 | Protein farnesyltransferase/geranylgeranyltransferase type-1 subunit alpha FNTA | P49354 | 44  | 2   | 3   | 3   | 6   | 1.50    | 1.50    | 3.00    |
| 1493 | Protein flightless-1 homolog FLII                                               | Q13045 | 145 | 67  | 68  | 69  | 58  | 1.01    | 1.03    | 0.87    |
| 1494 | Protein furry homolog-like FRYL                                                 | O94915 | 340 | 5   | 5   | 8   | 7   | 1.00    | 1.60    | 1.40    |
| 1495 | Protein Hiheshi C11orf73                                                        | Q53F73 | 22  | 0   | 0   | 3   | 0   | #DIV/0! | #DIV/0! | #DIV/0! |
| 1496 | Protein Hook homolog 3 HOOK3                                                    | Q86V58 | 83  | 0   | 3   | 0   | 0   | #DIV/0! | #DIV/0! | #DIV/0! |
| 1497 | Protein kinase C and casein kinase substrate in neurons protein 2 PACSIN2       | Q9UNF0 | 56  | 0   | 0   | 5   | 4   | #DIV/0! | #DIV/0! | #DIV/0! |
| 1498 | Protein kinase C delta-binding protein PRKDCBP                                  | Q969G5 | 28  | 5   | 2   | 7   | 6   | 0.40    | 1.40    | 1.20    |
| 1499 | Protein lin-7 homolog C LIN7C                                                   | Q9NUP9 | 22  | 2   | 0   | 0   | 0   | 0.00    | 0.00    | 0.00    |
| 1500 | Protein LYRIC MTDH                                                              | Q86UE4 | 64  | 0   | 0   | 5   | 8   | #DIV/0! | #DIV/0! | #DIV/0! |
| 1501 | Protein mago nashi homolog 2 MAGOHB                                             | Q96A72 | 17  | 8   | 5   | 12  | 8   | 0.63    | 1.50    | 1.00    |
| 1502 | Protein MEMO1 MEMO1                                                             | Q9Y316 | 34  | 11  | 6   | 8   | 7   | 0.55    | 0.73    | 0.64    |
| 1503 | Protein MON2 homolog MON2                                                       | Q7Z3U7 | 190 | 0   | 0   | 0   | 2   | #DIV/0! | #DIV/0! | #DIV/0! |
| 1504 | Protein NDRG1 NDRG1                                                             | Q92597 | 43  | 51  | 52  | 50  | 46  | 1.02    | 0.98    | 0.90    |
| 1505 | Protein Niban FAM129A                                                           | Q9BZQ8 | 103 | 3   | 5   | 6   | 6   | 1.67    | 2.00    | 2.00    |
| 1506 | Protein NipSnap homolog 1 NIPSNAP1                                              | Q9BPW8 | 33  | 5   | 6   | 4   | 4   | 1.20    | 0.80    | 0.80    |
| 1507 | Protein NipSnap homolog 2 GBAS                                                  | O75323 | 34  | 0   | 2   | 0   | 0   | #DIV/0! | #DIV/0! | #DIV/0! |
| 1508 | Protein NipSnap homolog 3A NIPSNAP3A                                            | Q9UJF0 | 28  | 6   | 6   | 5   | 0   | 1.00    | 0.83    | 0.00    |
| 1509 | Protein NOXP20 FAM114A1                                                         | Q8IWE2 | 61  | 0   | 0   | 4   | 0   | #DIV/0! | #DIV/0! | #DIV/0! |
| 1510 | Protein O-GlcNAcase MGEA5                                                       | O60502 | 103 | 6   | 12  | 15  | 13  | 2.00    | 2.50    | 2.17    |
| 1511 | Protein PBDC1 PBDC1                                                             | Q9BVG4 | 26  | 4   | 5   | 3   | 4   | 1.25    | 0.75    | 1.00    |
| 1512 | Protein phosphatase 1 regulatory subunit 12A PPP1R12A                           | O14974 | 115 | 2   | 6   | 9   | 12  | 3.00    | 4.50    | 6.00    |
| 1513 | Protein phosphatase 1 regulatory subunit 7 PPP1R7                               | Q15435 | 42  | 9   | 15  | 8   | 11  | 1.67    | 0.89    | 1.22    |
| 1514 | Protein phosphatase 1F PPM1F                                                    | P49593 | 50  | 0   | 0   | 0   | 2   | #DIV/0! | #DIV/0! | #DIV/0! |
| 1515 | Protein phosphatase 1G PPM1G                                                    | O15355 | 59  | 4   | 4   | 4   | 7   | 1.00    | 1.00    | 1.75    |
| 1516 | Protein phosphatase methyltransferase 1 PPME1                                   | Q9Y570 | 42  | 7   | 7   | 4   | 5   | 1.00    | 0.57    | 0.71    |
| 1517 | Protein phosphatase Slingshot homolog 3 SSH3                                    | Q8TE77 | 73  | 6   | 2   | 2   | 0   | 0.33    | 0.33    | 0.00    |
| 1518 | Protein PML PML                                                                 | P29590 | 98  | 4   | 6   | 4   | 3   | 1.50    | 1.00    | 0.75    |
| 1519 | Protein PRRC1 PRRC1                                                             | Q96M27 | 47  | 0   | 2   | 5   | 3   | #DIV/0! | #DIV/0! | #DIV/0! |
| 1520 | Protein PRRC2C PRRC2C                                                           | Q9Y520 | 317 | 0   | 0   | 0   | 2   | #DIV/0! | #DIV/0! | #DIV/0! |
| 1521 | Protein RER1 RER1                                                               | O15258 | 23  | 0   | 3   | 2   | 0   | #DIV/0! | #DIV/0! | #DIV/0! |
| 1522 | Protein S100-A10 S100A10                                                        | P60903 | 11  | 37  | 30  | 31  | 34  | 0.81    | 0.84    | 0.92    |
| 1523 | Protein S100-A11 S100A11                                                        | P31949 | 12  | 47  | 32  | 46  | 48  | 0.68    | 0.98    | 1.02    |
| 1524 | Protein S100-A13 S100A13                                                        | Q99584 | 11  | 3   | 2   | 5   | 5   | 0.67    | 1.67    | 1.67    |
| 1525 | Protein S100-A14 S100A14                                                        | Q9HCY8 | 12  | 35  | 33  | 36  | 30  | 0.94    | 1.03    | 0.86    |
| 1526 | Protein S100-A16 S100A16                                                        | Q96FQ6 | 12  | 51  | 34  | 39  | 41  | 0.67    | 0.76    | 0.80    |
| 1527 | Protein S100-A2 S100A2                                                          | P29034 | 11  | 26  | 27  | 36  | 21  | 1.04    | 1.38    | 0.81    |
| 1528 | Protein S100-A6 S100A6                                                          | P06703 | 10  | 8   | 7   | 11  | 8   | 0.88    | 1.38    | 1.00    |
| 1529 | Protein S100-A7 S100A7                                                          | P31151 | 11  | 6   | 5   | 4   | 0   | 0.83    | 0.67    | 0.00    |
| 1530 | Protein S100-A8 S100A8                                                          | P05109 | 11  | 45  | 37  | 47  | 36  | 0.82    | 1.04    | 0.80    |
| 1531 | Protein S100-A9 S100A9                                                          | P06702 | 13  | 42  | 35  | 38  | 34  | 0.83    | 0.90    | 0.81    |
| 1532 | Protein S100-P S100P                                                            | P25815 | 10  | 6   | 6   | 6   | 7   | 1.00    | 1.00    | 1.17    |
| 1533 | Protein scribble homolog SCRIB                                                  | Q14160 | 175 | 0   | 0   | 5   | 2   | #DIV/0! | #DIV/0! | #DIV/0! |
| 1534 | Protein SEC13 homolog SEC13                                                     | P55735 | 36  | 12  | 5   | 8   | 11  | 0.42    | 0.67    | 0.92    |
| 1535 | Protein sel-1 homolog 1 SEL1L                                                   | Q9UBV2 | 89  | 0   | 3   | 0   | 3   | #DIV/0! | #DIV/0! | #DIV/0! |
| 1536 | Protein SET SET                                                                 | Q01105 | 33  | 22  | 21  | 23  | 20  | 0.95    | 1.05    | 0.91    |
| 1537 | Protein TFG TFG                                                                 | Q92734 | 43  | 13  | 13  | 12  | 14  | 1.00    | 0.92    | 1.08    |
| 1538 | Protein transport protein Sec16A SEC16A                                         | O15027 | 234 | 5   | 4   | 5   | 4   | 0.80    | 1.00    | 0.80    |
| 1539 | Protein transport protein Sec23A SEC23A                                         | Q15436 | 86  | 22  | 24  | 24  | 17  | 1.09    | 1.09    | 0.77    |
| 1540 | Protein transport protein Sec23B SEC23B                                         | Q15437 | 86  | 11  | 11  | 3   | 9   | 1.00    | 0.27    | 0.82    |
| 1541 | Protein transport protein Sec24A SEC24A                                         | Q95486 | 120 | 0   | 3   | 2   | 3   | #DIV/0! | #DIV/0! | #DIV/0! |
| 1542 | Protein transport protein Sec24B SEC24B                                         | Q95487 | 137 | 9   | 6   | 7   | 8   | 0.67    | 0.78    | 0.89    |
| 1543 | Protein transport protein Sec24C SEC24C                                         | P53992 | 118 | 20  | 16  | 18  | 20  | 0.80    | 0.90    | 1.00    |
| 1544 | Protein transport protein Sec31A SEC31A                                         | O94979 | 133 | 39  | 61  | 60  | 59  | 1.56    | 1.54    | 1.51    |
| 1545 | Protein transport protein Sec61 subunit beta SEC61B                             | P60468 | 10  | 9   | 5   | 11  | 0   | 0.56    | 1.22    | 0.00    |
| 1546 | Protein transport protein Sec61 subunit gamma SEC61G                            | P60059 | 8   | 7   | 5   | 5   | 3   | 0.71    | 0.71    | 0.43    |
| 1547 | Protein unc-45 homolog A UNC45A                                                 | Q9H3U1 | 103 | 20  | 22  | 17  | 26  | 1.10    | 0.85    | 1.30    |
| 1548 | Protein VAC14 homolog VAC14                                                     | Q08AM6 | 88  | 4   | 0   | 0   | 0   | 0.00    | 0.00    | 0.00    |
| 1549 | Protein virilizer homolog KIAA1429                                              | Q69YN4 | 202 | 0   | 2   | 0   | 0   | #DIV/0! | #DIV/0! | #DIV/0! |
| 1550 | Protein YIF1A YIF1A                                                             | O95070 | 32  | 0   | 3   | 3   | 0   | #DIV/0! | #DIV/0! | #DIV/0! |
| 1551 | Protein yippee-like 5 YPEL5                                                     | P62699 | 14  | 0   | 0   | 2   | 2   | #DIV/0! | #DIV/0! | #DIV/0! |
| 1552 | Protein-glutamine gamma-glutamyltransferase 2 TGM2                              | P21980 | 77  | 43  | 52  | 40  | 48  | 1.21    | 0.93    | 1.12    |
| 1553 | Protein-L-isoadipate(D-aspartate) O-methyltransferase PCMT1                     | P22061 | 25  | 21  | 17  | 15  | 19  | 0.81    | 0.71    | 0.90    |
| 1554 | Protein-methionine sulfoxide oxidase MICAL1 MICAL1                              | Q8TDZ2 | 118 | 3   | 0   | 4   | 3   | 0.00    | 1.33    | 1.00    |
| 1555 | Proteolipid protein 2 PLP2                                                      | Q04941 | 17  | 14  | 17  | 13  | 11  | 1.21    | 0.93    | 0.79    |



|      |                                                                                        |             |     |     |     |     |     |         |         |         |
|------|----------------------------------------------------------------------------------------|-------------|-----|-----|-----|-----|-----|---------|---------|---------|
| 1556 | Prothymosin alpha PTMA                                                                 | P06454      | 12  | 10  | 7   | 13  | 14  | 0.70    | 1.30    | 1.40    |
| 1557 | Protocadherin Fat 1 FAT1                                                               | Q14517      | 506 | 2   | 6   | 0   | 2   | 3.00    | 0.00    | 1.00    |
| 1558 | Proto-oncogene tyrosine-protein kinase Src SRC                                         | P12931      | 60  | 6   | 4   | 2   | 7   | 0.67    | 0.33    | 1.17    |
| 1559 | Pseudouridine-5'-monophosphatase HDHD1                                                 | Q08623      | 25  | 6   | 8   | 0   | 6   | 1.33    | 0.00    | 1.00    |
| 1560 | Purine nucleoside phosphorylase PNP                                                    | P00491      | 32  | 86  | 100 | 113 | 119 | 1.16    | 1.31    | 1.38    |
| 1561 | Puromycin-sensitive aminopeptidase NPEPPS                                              | P55786      | 103 | 56  | 40  | 31  | 34  | 0.71    | 0.55    | 0.61    |
| 1562 | Putative adenosylhomocysteinase 2 AHCYL1                                               | Q04865      | 59  | 0   | 2   | 0   | 0   | #DIV/0! | #DIV/0! | #DIV/0! |
| 1563 | Putative cytochrome b-c1 complex subunit Rieske-like protein 1 UQCRFS1P1 PE=5          | POC7P4 (+1) | 31  | 0   | 0   | 0   | 3   | #DIV/0! | #DIV/0! | #DIV/0! |
| 1564 | Putative deoxyribonuclease TATDN1 TATDN1                                               | Q6P1N9      | 34  | 0   | 2   | 0   | 0   | #DIV/0! | #DIV/0! | #DIV/0! |
| 1565 | Putative GTP cyclohydrolase 1 type 2 NIF3L1 NIF3L1                                     | Q9GZT8      | 42  | 0   | 0   | 3   | 3   | #DIV/0! | #DIV/0! | #DIV/0! |
| 1566 | Putative hydrolase RBBP9 RBBP9                                                         | O75884      | 21  | 0   | 2   | 0   | 0   | #DIV/0! | #DIV/0! | #DIV/0! |
| 1567 | Putative keratin-87 protein KRT87P PE=5                                                | A6NCN2      | 29  | 0   | 0   | 0   | 115 | #DIV/0! | #DIV/0! | #DIV/0! |
| 1568 | Putative peptidyl-tRNA hydrolase PTRHD1 PTRHD1                                         | Q6GMV3      | 16  | 3   | 3   | 0   | 3   | 1.00    | 0.00    | 1.00    |
| 1569 | Putative pre-mRNA-splicing factor ATP-dependent RNA helicase DHX15 DHX15               | O43143      | 91  | 14  | 16  | 23  | 26  | 1.14    | 1.64    | 1.86    |
| 1570 | Putative pyridoxal-dependent decarboxylase domain-containing protein 2 PDXDC2P PE=5    | Q6P474      | 52  | 0   | 0   | 0   | 2   | #DIV/0! | #DIV/0! | #DIV/0! |
| 1571 | Putative RNA-binding protein 3 RBM3                                                    | P98179      | 17  | 2   | 0   | 2   | 0   | 0.00    | 1.00    | 0.00    |
| 1572 | Putative RNA-binding protein Luc7-like 2 LUC7L2                                        | Q9Y383      | 47  | 2   | 0   | 0   | 0   | 0.00    | 0.00    | 0.00    |
| 1573 | Putative small nuclear ribonucleoprotein G-like protein 15 SNRPGP15 PE=5               | A8MWD9 (+1) | 9   | 6   | 4   | 3   | 4   | 0.67    | 0.50    | 0.67    |
| 1574 | Pyridoxal kinase PDXK                                                                  | O00764      | 35  | 23  | 25  | 21  | 21  | 1.09    | 0.91    | 0.91    |
| 1575 | Pyruvate carboxylase, mitochondrial PC                                                 | P11498      | 130 | 2   | 8   | 8   | 5   | 4.00    | 4.00    | 2.50    |
| 1576 | Pyruvate dehydrogenase E1 component subunit alpha, somatic form, mitochondrial PDHFE1A | P08559      | 43  | 5   | 3   | 5   | 7   | 0.60    | 1.00    | 1.40    |
| 1577 | Pyruvate dehydrogenase E1 component subunit beta, mitochondrial PDHFB                  | P11177      | 39  | 15  | 14  | 12  | 11  | 0.93    | 0.80    | 0.73    |
| 1578 | Pyruvate kinase PKM PKM                                                                | P14618      | 58  | 670 | 675 | 683 | 673 | 1.01    | 1.02    | 1.00    |
| 1579 | Quinone oxidoreductase CRYZ                                                            | Q08257      | 35  | 5   | 15  | 11  | 11  | 3.00    | 2.20    | 2.20    |
| 1580 | Quinone oxidoreductase PIG3 TP53I3                                                     | Q53FA7      | 36  | 24  | 27  | 26  | 23  | 1.13    | 1.08    | 0.96    |
| 1581 | Rab GDP dissociation inhibitor alpha GDI1                                              | P31150      | 51  | 40  | 38  | 36  | 30  | 0.95    | 0.90    | 0.75    |
| 1582 | Rab GDP dissociation inhibitor beta GDI2                                               | P50395      | 51  | 118 | 123 | 135 | 126 | 1.04    | 1.14    | 1.07    |
| 1583 | Rab3 GTPase-activating protein catalytic subunit RAB3GAP1                              | Q15042      | 111 | 4   | 8   | 4   | 5   | 2.00    | 1.00    | 1.25    |
| 1584 | Rab3 GTPase-activating protein non-catalytic subunit RAB3GAP2                          | Q9H2M9      | 156 | 4   | 17  | 18  | 7   | 4.25    | 4.50    | 1.75    |
| 1585 | Rabankyrin-5 ANKFY1                                                                    | Q9P2R3      | 128 | 0   | 0   | 3   | 3   | #DIV/0! | #DIV/0! | #DIV/0! |
| 1586 | Rab-like protein 6 RABL6                                                               | Q3YEC7      | 80  | 0   | 0   | 3   | 0   | #DIV/0! | #DIV/0! | #DIV/0! |
| 1587 | RAC-alpha serine/threonine-protein kinase AKT1                                         | P31749      | 56  | 0   | 0   | 0   | 2   | #DIV/0! | #DIV/0! | #DIV/0! |
| 1588 | RAD50-interacting protein 1 RINT1                                                      | Q6NUQ1      | 91  | 2   | 0   | 0   | 0   | 0.00    | 0.00    | 0.00    |
| 1589 | Radixin RDX                                                                            | P35241      | 69  | 83  | 65  | 77  | 75  | 0.78    | 0.93    | 0.90    |
| 1590 | Raftlin RFTN1                                                                          | Q14699      | 63  | 0   | 2   | 2   | 0   | #DIV/0! | #DIV/0! | #DIV/0! |
| 1591 | Regulator complex protein LAMTOR1 LAMTOR1                                              | Q6IAA8      | 18  | 7   | 8   | 8   | 3   | 1.14    | 1.14    | 0.43    |
| 1592 | Regulator complex protein LAMTOR2 LAMTOR2                                              | Q9Y2Q5      | 14  | 14  | 9   | 11  | 10  | 0.64    | 0.79    | 0.71    |
| 1593 | Regulator complex protein LAMTOR3 LAMTOR3                                              | Q9UHA4      | 14  | 3   | 2   | 3   | 7   | 0.67    | 1.00    | 2.33    |
| 1594 | Regulator complex protein LAMTOR5 LAMTOR5                                              | Q43504      | 10  | 5   | 0   | 7   | 0   | 0.00    | 1.40    | 0.00    |
| 1595 | Ran GTPase-activating protein 1 RANGAP1                                                | P46060      | 64  | 18  | 19  | 21  | 21  | 1.06    | 1.17    | 1.17    |
| 1596 | Ran-binding protein 3 RANBP3                                                           | Q9H6Z4      | 60  | 0   | 2   | 2   | 3   | #DIV/0! | #DIV/0! | #DIV/0! |
| 1597 | Ran-specific GTPase-activating protein RANBP1                                          | P43487      | 23  | 8   | 3   | 4   | 0   | 0.38    | 0.50    | 0.00    |
| 1598 | Rap1 GTPase-GDP dissociation stimulator 1 RAP1GDS1                                     | P52306      | 66  | 14  | 9   | 18  | 16  | 0.64    | 1.29    | 1.14    |
| 1599 | Ras GTPase-activating protein 1 RASA1                                                  | P20936      | 116 | 6   | 9   | 0   | 10  | 1.50    | 0.00    | 1.67    |
| 1600 | Ras GTPase-activating protein-binding protein 1 G3BP1                                  | Q13283      | 52  | 32  | 23  | 25  | 15  | 0.72    | 0.78    | 0.47    |
| 1601 | Ras GTPase-activating protein-binding protein 2 G3BP2                                  | Q9UN86      | 54  | 8   | 10  | 7   | 4   | 1.25    | 0.88    | 0.50    |
| 1602 | Ras GTPase-activating-like protein IQGAP1 IQGAP1                                       | P46940      | 189 | 276 | 290 | 260 | 271 | 1.05    | 0.94    | 0.98    |
| 1603 | Ras suppressor protein 1 RSU1                                                          | Q15404      | 32  | 7   | 9   | 10  | 8   | 1.29    | 1.43    | 1.14    |
| 1604 | Ras-related C3 botulinum toxin substrate 1 RAC1                                        | P63000      | 21  | 38  | 35  | 35  | 42  | 0.92    | 0.92    | 1.11    |
| 1605 | Ras-related C3 botulinum toxin substrate 2 RAC2                                        | P15153      | 21  | 41  | 19  | 19  | 21  | 0.46    | 0.46    | 0.51    |
| 1606 | Ras-related GTP-binding protein A RRAGA                                                | Q7L523      | 37  | 3   | 3   | 0   | 2   | 1.00    | 0.00    | 0.67    |
| 1607 | Ras-related GTP-binding protein C RRAGC                                                | Q9HB90      | 44  | 3   | 0   | 0   | 0   | 0.00    | 0.00    | 0.00    |
| 1608 | Ras-related protein Rab-10 RAB10                                                       | P61026      | 23  | 34  | 38  | 36  | 34  | 1.12    | 1.06    | 1.00    |
| 1609 | Ras-related protein Rab-11B RAB11B                                                     | Q15907      | 24  | 60  | 58  | 65  | 61  | 0.97    | 1.08    | 1.02    |
| 1610 | Ras-related protein Rab-14 RAB14                                                       | P61106      | 24  | 62  | 58  | 54  | 45  | 0.94    | 0.87    | 0.73    |
| 1611 | Ras-related protein Rab-18 RAB18                                                       | Q9NP72      | 23  | 44  | 34  | 37  | 29  | 0.77    | 0.84    | 0.66    |
| 1612 | Ras-related protein Rab-1A RAB1A                                                       | P62820      | 23  | 93  | 90  | 90  | 74  | 0.97    | 0.97    | 0.80    |
| 1613 | Ras-related protein Rab-1B RAB1B                                                       | Q9H0U4      | 22  | 60  | 65  | 65  | 54  | 1.08    | 1.08    | 0.90    |
| 1614 | Ras-related protein Rab-21 RAB21                                                       | Q9UL25      | 24  | 11  | 18  | 12  | 9   | 1.64    | 1.09    | 0.82    |
| 1615 | Ras-related protein Rab-22A RAB22A                                                     | Q9UL26      | 22  | 3   | 3   | 0   | 0   | 1.00    | 0.00    | 0.00    |
| 1616 | Ras-related protein Rab-23 RAB23                                                       | Q9ULC3      | 27  | 2   | 2   | 2   | 0   | 1.00    | 1.00    | 0.00    |
| 1617 | Ras-related protein Rab-25 RAB25                                                       | P57735      | 23  | 11  | 7   | 7   | 4   | 0.64    | 0.64    | 0.36    |
| 1618 | Ras-related protein Rab-27A RAB27A                                                     | P51159      | 25  | 3   | 0   | 0   | 0   | 0.00    | 0.00    | 0.00    |
| 1619 | Ras-related protein Rab-27B RAB27B                                                     | O00194      | 25  | 2   | 4   | 5   | 2   | 2.00    | 2.50    | 1.00    |
| 1620 | Ras-related protein Rab-2A RAB2A                                                       | P61019      | 24  | 57  | 56  | 49  | 42  | 0.98    | 0.86    | 0.74    |
| 1621 | Ras-related protein Rab-31 RAB31                                                       | Q13636      | 22  | 0   | 2   | 3   | 0   | #DIV/0! | #DIV/0! | #DIV/0! |
| 1622 | Ras-related protein Rab-32 RAB32                                                       | Q13637      | 25  | 16  | 14  | 11  | 9   | 0.88    | 0.69    | 0.56    |
| 1623 | Ras-related protein Rab-34 RAB34                                                       | Q9BZG1      | 29  | 0   | 5   | 2   | 0   | #DIV/0! | #DIV/0! | #DIV/0! |
| 1624 | Ras-related protein Rab-35 RAB35                                                       | Q15286      | 23  | 11  | 17  | 12  | 14  | 1.55    | 1.09    | 1.27    |
| 1625 | Ras-related protein Rab-38 RAB38                                                       | P57729      | 24  | 0   | 5   | 0   | 0   | #DIV/0! | #DIV/0! | #DIV/0! |
| 1626 | Ras-related protein Rab-3D RAB3D                                                       | O95716      | 24  | 15  | 15  | 15  | 7   | 1.00    | 1.00    | 0.47    |
| 1627 | Ras-related protein Rab-43 RAB43                                                       | Q86Y56      | 23  | 11  | 8   | 10  | 10  | 0.73    | 0.91    | 0.91    |
| 1628 | Ras-related protein Rab-4A RAB4A                                                       | P20338      | 24  | 7   | 0   | 10  | 8   | 0.00    | 1.43    | 1.14    |
| 1629 | Ras-related protein Rab-5A RAB5A                                                       | P20339      | 24  | 19  | 21  | 19  | 11  | 1.11    | 1.00    | 0.58    |
| 1630 | Ras-related protein Rab-5B RAB5B                                                       | P61020      | 24  | 17  | 18  | 18  | 16  | 1.06    | 1.06    | 0.94    |
| 1631 | Ras-related protein Rab-5C RAB5C                                                       | P51148      | 23  | 35  | 33  | 47  | 46  | 0.94    | 1.34    | 1.31    |
| 1632 | Ras-related protein Rab-6A RAB6A                                                       | P20340      | 24  | 52  | 43  | 45  | 38  | 0.83    | 0.87    | 0.73    |
| 1633 | Ras-related protein Rab-7a RAB7A                                                       | P51149      | 23  | 78  | 78  | 79  | 70  | 1.00    | 1.01    | 0.90    |
| 1634 | Ras-related protein Rab-8A RAB8A                                                       | P61006      | 24  | 11  | 7   | 0   | 11  | 0.64    | 0.00    | 1.00    |
| 1635 | Ras-related protein Ral-A RALA                                                         | P11233      | 24  | 9   | 8   | 9   | 15  | 0.89    | 1.00    | 1.67    |
| 1636 | Ras-related protein Ral-B RALB                                                         | P11234      | 23  | 10  | 9   | 6   | 8   | 0.90    | 0.60    | 0.80    |
| 1637 | Ras-related protein Rap-1A RAP1A                                                       | P62834      | 21  | 0   | 22  | 19  | 0   | #DIV/0! | #DIV/0! | #DIV/0! |

|      |                                                                    |        |     |    |    |     |    |         |         |         |
|------|--------------------------------------------------------------------|--------|-----|----|----|-----|----|---------|---------|---------|
| 1638 | Ras-related protein Rap-1b RAP1B                                   | P61224 | 21  | 40 | 39 | 30  | 30 | 0.98    | 0.75    | 0.75    |
| 1639 | Ras-related protein Rap-2b RAP2B                                   | P61225 | 21  | 15 | 10 | 9   | 8  | 0.67    | 0.60    | 0.53    |
| 1640 | Ras-related protein R-Ras RRAS                                     | P10301 | 23  | 10 | 8  | 8   | 10 | 0.80    | 0.80    | 1.00    |
| 1641 | Ras-related protein R-Ras2 RRAS2                                   | P62070 | 23  | 4  | 7  | 5   | 3  | 1.75    | 1.25    | 0.75    |
| 1642 | Receptor expression-enhancing protein 5 REEP5                      | Q00765 | 21  | 17 | 16 | 16  | 21 | 0.94    | 0.94    | 1.24    |
| 1643 | Receptor-type tyrosine-protein phosphatase F PTPRF                 | P10586 | 213 | 2  | 3  | 8   | 5  | 1.50    | 4.00    | 2.50    |
| 1644 | Redox-regulatory protein FAM213A FAM213A                           | Q9BRX8 | 26  | 11 | 11 | 13  | 11 | 1.00    | 1.18    | 1.00    |
| 1645 | Regulation of nuclear pre-mRNA domain-containing protein 1B RPRD1B | Q9NQG5 | 37  | 2  | 2  | 4   | 2  | 1.00    | 2.00    | 1.00    |
| 1646 | Regulator of microtubule dynamics protein 1 RMDN1                  | Q96DB5 | 36  | 7  | 6  | 5   | 3  | 0.86    | 0.71    | 0.43    |
| 1647 | Regulator of nonsense transcripts 1 UPF1                           | Q92900 | 124 | 15 | 13 | 16  | 20 | 0.87    | 1.07    | 1.33    |
| 1648 | Regulator of nonsense transcripts 2 UPF2                           | Q9HAU5 | 148 | 0  | 2  | 0   | 0  | #DIV/0! | #DIV/0! | #DIV/0! |
| 1649 | RelA-associated inhibitor PPP1R13L                                 | Q8WUF5 | 89  | 14 | 18 | 24  | 23 | 1.29    | 1.71    | 1.64    |
| 1650 | Replication protein A 14 kDa subunit RPA3                          | P35244 | 14  | 0  | 3  | 3   | 4  | #DIV/0! | #DIV/0! | #DIV/0! |
| 1651 | Replication protein A 32 kDa subunit RPA2                          | P15927 | 29  | 2  | 0  | 2   | 0  | 0.00    | 1.00    | 0.00    |
| 1652 | Reticulocalbin-1 RCN1                                              | Q15293 | 39  | 4  | 5  | 4   | 0  | 1.25    | 1.00    | 0.00    |
| 1653 | Reticulocalbin-2 RCN2                                              | Q14257 | 37  | 2  | 0  | 3   | 4  | 0.00    | 1.50    | 2.00    |
| 1654 | Reticulon-4 RTN4                                                   | Q9NQC3 | 130 | 55 | 75 | 69  | 62 | 1.36    | 1.25    | 1.13    |
| 1655 | Retinol dehydrogenase 11 RDH11                                     | Q8TC12 | 35  | 7  | 6  | 3   | 3  | 0.86    | 0.43    | 0.43    |
| 1656 | Retinol-binding protein 1 RBP1                                     | P09455 | 16  | 0  | 0  | 4   | 4  | #DIV/0! | #DIV/0! | #DIV/0! |
| 1657 | Rho GDP-dissociation inhibitor 1 ARHGDI A                          | P52565 | 23  | 35 | 30 | 23  | 40 | 0.86    | 0.66    | 1.14    |
| 1658 | Rho GDP-dissociation inhibitor 2 ARHGDI B                          | P52566 | 23  | 8  | 11 | 5   | 5  | 1.38    | 0.63    | 0.63    |
| 1659 | Rho GTPase-activating protein 1 ARHGAP1                            | Q07960 | 50  | 36 | 36 | 38  | 38 | 1.00    | 1.06    | 1.06    |
| 1660 | Rho guanine nucleotide exchange factor 1 ARHGEF1                   | Q92888 | 102 | 5  | 3  | 4   | 3  | 0.60    | 0.80    | 0.60    |
| 1661 | Rho guanine nucleotide exchange factor 7 ARHGEF7                   | Q14155 | 90  | 0  | 0  | 2   | 0  | #DIV/0! | #DIV/0! | #DIV/0! |
| 1662 | Rho-associated protein kinase 1 ROCK1                              | Q13464 | 158 | 0  | 0  | 7   | 3  | #DIV/0! | #DIV/0! | #DIV/0! |
| 1663 | Rho-associated protein kinase 2 ROCK2                              | Q75116 | 161 | 0  | 9  | 10  | 7  | #DIV/0! | #DIV/0! | #DIV/0! |
| 1664 | Rho-related GTP-binding protein RhoB RHOB                          | P62745 | 22  | 6  | 10 | 0   | 0  | 1.67    | 0.00    | 0.00    |
| 1665 | Rho-related GTP-binding protein RhoC RHOC                          | P08134 | 22  | 47 | 56 | 53  | 75 | 1.19    | 1.13    | 1.60    |
| 1666 | Rho-related GTP-binding protein RhoE RND3                          | P61587 | 27  | 0  | 3  | 5   | 0  | #DIV/0! | #DIV/0! | #DIV/0! |
| 1667 | Rho-related GTP-binding protein RhoG RHOG                          | P84095 | 21  | 26 | 19 | 11  | 11 | 0.73    | 0.42    | 0.42    |
| 1668 | Rhotekin RTKN                                                      | Q985T9 | 63  | 0  | 0  | 3   | 2  | #DIV/0! | #DIV/0! | #DIV/0! |
| 1669 | Ribonuclease inhibitor RNH1                                        | P13489 | 50  | 75 | 72 | 61  | 62 | 0.96    | 0.81    | 0.83    |
| 1670 | Ribonuclease P protein subunit p30 RPP30                           | P78346 | 29  | 0  | 0  | 3   | 0  | #DIV/0! | #DIV/0! | #DIV/0! |
| 1671 | Ribonucleases P/MRP protein subunit POP1 POP1                      | Q99575 | 115 | 2  | 0  | 0   | 0  | 0.00    | 0.00    | 0.00    |
| 1672 | Ribonucleoside-diphosphate reductase large subunit RRM1            | P23921 | 90  | 0  | 0  | 2   | 0  | #DIV/0! | #DIV/0! | #DIV/0! |
| 1673 | Ribonucleoside-diphosphate reductase subunit M2 RRM2               | P31350 | 45  | 0  | 0  | 0   | 2  | #DIV/0! | #DIV/0! | #DIV/0! |
| 1674 | Ribose-phosphate pyrophosphokinase 1 PRPS1                         | P60891 | 35  | 7  | 13 | 13  | 11 | 1.86    | 1.86    | 1.57    |
| 1675 | Ribosomal L1 domain-containing protein 1 RSL1D1                    | O76021 | 55  | 4  | 0  | 4   | 4  | 0.00    | 1.00    | 1.00    |
| 1676 | Ribosomal protein S6 kinase alpha-1 RPS6KA1                        | Q15418 | 83  | 6  | 5  | 6   | 4  | 0.83    | 1.00    | 0.67    |
| 1677 | Ribosomal protein S6 kinase alpha-3 RPS6KA3                        | P51812 | 84  | 7  | 0  | 0   | 0  | 0.00    | 0.00    | 0.00    |
| 1678 | Ribosome maturation protein SBDS SBDS                              | Q9Y3A5 | 29  | 14 | 14 | 13  | 18 | 1.00    | 0.93    | 1.29    |
| 1679 | Ribosome-binding protein 1 RRBP1                                   | Q9P2E9 | 152 | 15 | 8  | 14  | 17 | 0.53    | 0.93    | 1.13    |
| 1680 | RNA 3'-terminal phosphate cyclase RTCA                             | O00442 | 39  | 5  | 3  | 0   | 2  | 0.60    | 0.00    | 0.40    |
| 1681 | RNA-binding motif protein, X chromosome RBMX                       | P38159 | 42  | 3  | 7  | 9   | 10 | 2.33    | 3.00    | 3.33    |
| 1682 | RNA-binding protein 12B RBM12B                                     | Q8IXT5 | 118 | 0  | 0  | 3   | 0  | #DIV/0! | #DIV/0! | #DIV/0! |
| 1683 | RNA-binding protein 14 RBM14                                       | Q96PK6 | 69  | 0  | 0  | 0   | 2  | #DIV/0! | #DIV/0! | #DIV/0! |
| 1684 | RNA-binding protein 25 RBM25                                       | P49756 | 100 | 4  | 0  | 0   | 2  | 0.00    | 0.00    | 0.50    |
| 1685 | RNA-binding protein 39 RBM39                                       | Q14498 | 59  | 6  | 6  | 5   | 5  | 1.00    | 0.83    | 0.83    |
| 1686 | RNA-binding protein 4 RBM4                                         | Q9BWF3 | 40  | 3  | 0  | 0   | 3  | 0.00    | 0.00    | 1.00    |
| 1687 | RNA-binding protein EWS EWSR1                                      | Q01844 | 68  | 0  | 0  | 0   | 4  | #DIV/0! | #DIV/0! | #DIV/0! |
| 1688 | RNA-binding protein FUS FUS                                        | P35637 | 53  | 5  | 4  | 8   | 8  | 0.80    | 1.60    | 1.60    |
| 1689 | rRNA 2'-O-methyltransferase fibrillarin FBL                        | P22087 | 34  | 0  | 7  | 3   | 5  | #DIV/0! | #DIV/0! | #DIV/0! |
| 1690 | RRP12-like protein RRP12                                           | Q5JTH9 | 144 | 0  | 0  | 2   | 0  | #DIV/0! | #DIV/0! | #DIV/0! |
| 1691 | RuvB-like 1 RUVBL1                                                 | Q9Y265 | 50  | 18 | 23 | 17  | 24 | 1.28    | 0.94    | 1.33    |
| 1692 | RuvB-like 2 RUVBL2                                                 | Q9Y230 | 51  | 15 | 19 | 22  | 19 | 1.27    | 1.47    | 1.27    |
| 1693 | S-adenosylmethionine synthase isoform type-2 MAT2A                 | P31153 | 44  | 13 | 11 | 9   | 11 | 0.85    | 0.69    | 0.85    |
| 1694 | SAP domain-containing ribonucleoprotein SARNP                      | P82979 | 24  | 0  | 0  | 0   | 3  | #DIV/0! | #DIV/0! | #DIV/0! |
| 1695 | Sarcoplasmic/endoplasmic reticulum calcium ATPase 2 ATP2A2         | P16615 | 115 | 99 | 82 | 100 | 84 | 0.83    | 1.01    | 0.85    |
| 1696 | Scaffold attachment factor B2 SAFB2                                | Q14151 | 107 | 0  | 0  | 3   | 2  | #DIV/0! | #DIV/0! | #DIV/0! |
| 1697 | Sec1 family domain-containing protein 1 SCFD1                      | Q8WVM8 | 72  | 3  | 12 | 16  | 17 | 4.00    | 5.33    | 5.67    |
| 1698 | SEC14-like protein 2 SEC14L2                                       | O76054 | 46  | 6  | 3  | 4   | 6  | 0.50    | 0.67    | 1.00    |
| 1699 | SEC23-interacting protein SEC23IP                                  | Q9Y6Y8 | 111 | 9  | 7  | 12  | 10 | 0.78    | 1.33    | 1.11    |
| 1700 | Secernin-1 SCRNI                                                   | Q12765 | 46  | 2  | 0  | 0   | 0  | 0.00    | 0.00    | 0.00    |
| 1701 | Secretory carrier-associated membrane protein 1 SCAMP1             | O15126 | 38  | 3  | 0  | 4   | 0  | 0.00    | 1.33    | 0.00    |
| 1702 | Selenide, water dikinase 1 SEPHS1                                  | P49903 | 43  | 2  | 0  | 3   | 0  | 0.00    | 1.50    | 0.00    |
| 1703 | Selenoprotein S VIMP                                               | Q9BQE4 | 21  | 3  | 4  | 0   | 0  | 1.33    | 0.00    | 0.00    |
| 1704 | Septaplerin reductase SPR                                          | P35270 | 28  | 2  | 3  | 3   | 0  | 1.50    | 1.50    | 0.00    |
| 1705 | Septin-11 SEPT11                                                   | Q9NVA2 | 49  | 5  | 0  | 0   | 5  | 0.00    | 0.00    | 1.00    |
| 1706 | Septin-2 SEPT2                                                     | Q15019 | 41  | 7  | 6  | 9   | 11 | 0.86    | 1.29    | 1.57    |
| 1707 | Septin-7 SEPT7                                                     | Q16181 | 51  | 7  | 6  | 4   | 7  | 0.86    | 0.57    | 1.00    |
| 1708 | Septin-9 SEPT9                                                     | Q9UHD8 | 65  | 2  | 5  | 6   | 10 | 2.50    | 3.00    | 5.00    |
| 1709 | Sequestosome-1 SQSTM1                                              | Q13501 | 48  | 7  | 9  | 7   | 7  | 1.29    | 1.00    | 1.00    |
| 1710 | Serine hydroxymethyltransferase, mitochondrial SHMT2               | P34897 | 56  | 19 | 27 | 24  | 28 | 1.42    | 1.26    | 1.47    |
| 1711 | Serine palmitoyltransferase 1 SPTLC1                               | O15269 | 53  | 2  | 2  | 0   | 0  | 1.00    | 0.00    | 0.00    |
| 1712 | Serine/arginine repetitive matrix protein 1 SRRM1                  | Q8IYB3 | 102 | 2  | 8  | 3   | 4  | 4.00    | 1.50    | 2.00    |
| 1713 | Serine/arginine repetitive matrix protein 2 SRRM2                  | Q9UQ35 | 300 | 4  | 4  | 0   | 6  | 1.00    | 0.00    | 1.50    |
| 1714 | Serine/arginine-rich splicing factor 1 SRSF1                       | Q07955 | 28  | 14 | 14 | 17  | 11 | 1.00    | 1.21    | 0.79    |
| 1715 | Serine/arginine-rich splicing factor 10 SRSF10                     | O75494 | 31  | 2  | 2  | 0   | 2  | 1.00    | 0.00    | 1.00    |
| 1716 | Serine/arginine-rich splicing factor 11 SRSF11                     | Q05519 | 54  | 0  | 2  | 5   | 6  | #DIV/0! | #DIV/0! | #DIV/0! |
| 1717 | Serine/arginine-rich splicing factor 2 SRSF2                       | Q01130 | 25  | 4  | 8  | 12  | 9  | 2.00    | 3.00    | 2.25    |
| 1718 | Serine/arginine-rich splicing factor 3 SRSF3                       | P84103 | 19  | 16 | 13 | 8   | 12 | 0.81    | 0.50    | 0.75    |
| 1719 | Serine/arginine-rich splicing factor 6 SRSF6                       | Q13247 | 40  | 2  | 0  | 2   | 0  | 0.00    | 1.00    | 0.00    |



|      |                                                                                     |            |     |     |     |     |     |         |         |         |
|------|-------------------------------------------------------------------------------------|------------|-----|-----|-----|-----|-----|---------|---------|---------|
| 1720 | Serine/arginine-rich splicing factor 7 SRSF7                                        | Q16629     | 27  | 6   | 7   | 10  | 12  | 1.17    | 1.67    | 2.00    |
| 1721 | Serine/arginine-rich splicing factor 9 SRSF9                                        | Q13242     | 26  | 4   | 0   | 4   | 0   | 0.00    | 1.00    | 0.00    |
| 1722 | Serine/threonine-protein kinase 10 STK10                                            | O94804     | 112 | 8   | 7   | 7   | 6   | 0.88    | 0.88    | 0.75    |
| 1723 | Serine/threonine-protein kinase 24 STK24                                            | Q9Y6E0     | 49  | 9   | 10  | 12  | 9   | 1.11    | 1.33    | 1.00    |
| 1724 | Serine/threonine-protein kinase 26 STK26                                            | Q9P289     | 47  | 7   | 0   | 0   | 0   | 0.00    | 0.00    | 0.00    |
| 1725 | Serine/threonine-protein kinase mTOR MTOR                                           | P42345     | 289 | 4   | 3   | 3   | 0   | 0.75    | 0.75    | 0.00    |
| 1726 | Serine/threonine-protein kinase Nek7 NEK7                                           | Q8TDX7     | 35  | 2   | 0   | 2   | 0   | 0.00    | 1.00    | 0.00    |
| 1727 | Serine/threonine-protein kinase OSR1 OXSR1                                          | O95747     | 58  | 6   | 14  | 13  | 11  | 2.33    | 2.17    | 1.83    |
| 1728 | Serine/threonine-protein kinase PAK 2 PAK2                                          | Q13177     | 58  | 17  | 13  | 17  | 21  | 0.76    | 1.00    | 1.24    |
| 1729 | Serine/threonine-protein kinase WNK1 WNK1                                           | Q9H4A3     | 251 | 0   | 0   | 2   | 0   | #DIV/0! | #DIV/0! | #DIV/0! |
| 1730 | Serine/threonine-protein phosphatase 2A 55 kDa regulatory subunit B alpha isoform P | P63151     | 52  | 8   | 10  | 11  | 10  | 1.25    | 1.38    | 1.25    |
| 1731 | Serine/threonine-protein phosphatase 2A 56 kDa regulatory subunit delta isoform PPP | Q14738     | 70  | 11  | 11  | 11  | 13  | 1.00    | 1.00    | 1.18    |
| 1732 | Serine/threonine-protein phosphatase 2A 65 kDa regulatory subunit A alpha isoform P | P30153     | 65  | 105 | 97  | 87  | 75  | 0.92    | 0.83    | 0.71    |
| 1733 | Serine/threonine-protein phosphatase 2A 65 kDa regulatory subunit A beta isoform PP | P30154     | 66  | 0   | 14  | 0   | 0   | #DIV/0! | #DIV/0! | #DIV/0! |
| 1734 | Serine/threonine-protein phosphatase 2A activator PPP2R4                            | Q15257     | 41  | 12  | 4   | 5   | 8   | 0.33    | 0.42    | 0.67    |
| 1735 | Serine/threonine-protein phosphatase 2A catalytic subunit alpha isoform PPP2CA      | P67775     | 36  | 33  | 29  | 30  | 21  | 0.88    | 0.91    | 0.64    |
| 1736 | Serine/threonine-protein phosphatase 2A catalytic subunit beta isoform PPP2CB       | P62714     | 36  | 31  | 25  | 0   | 0   | 0.81    | 0.00    | 0.00    |
| 1737 | Serine/threonine-protein phosphatase 2B catalytic subunit alpha isoform PPP3CA      | Q08209     | 59  | 17  | 11  | 14  | 19  | 0.65    | 0.82    | 1.12    |
| 1738 | Serine/threonine-protein phosphatase 4 catalytic subunit PPP4C                      | P60510     | 35  | 12  | 10  | 7   | 7   | 0.83    | 0.58    | 0.58    |
| 1739 | Serine/threonine-protein phosphatase 4 regulatory subunit 1 PPP4R1                  | Q8TF05     | 107 | 12  | 11  | 17  | 12  | 0.92    | 1.42    | 1.00    |
| 1740 | Serine/threonine-protein phosphatase 5 PPP5C                                        | P53041     | 57  | 0   | 0   | 3   | 2   | #DIV/0! | #DIV/0! | #DIV/0! |
| 1741 | Serine/threonine-protein phosphatase 6 catalytic subunit PPP6C                      | O00743     | 35  | 8   | 8   | 8   | 5   | 1.00    | 1.00    | 0.63    |
| 1742 | Serine/threonine-protein phosphatase 6 regulatory subunit 3 PPP6R3                  | Q5H9R7     | 98  | 0   | 2   | 0   | 0   | #DIV/0! | #DIV/0! | #DIV/0! |
| 1743 | Serine/threonine-protein phosphatase CPPED1 CPPED1                                  | Q9BRF8     | 36  | 2   | 0   | 0   | 3   | 0.00    | 0.00    | 1.50    |
| 1744 | Serine/threonine-protein phosphatase PP1-alpha catalytic subunit PPP1CA             | P62136     | 38  | 0   | 0   | 37  | 38  | #DIV/0! | #DIV/0! | #DIV/0! |
| 1745 | Serine/threonine-protein phosphatase PP1-beta catalytic subunit PPP1CB              | P62140     | 37  | 53  | 38  | 44  | 37  | 0.72    | 0.83    | 0.70    |
| 1746 | Serine/threonine-protein phosphatase PP1-gamma catalytic subunit PPP1CC             | P36873     | 37  | 24  | 33  | 38  | 37  | 1.38    | 1.58    | 1.54    |
| 1747 | Serine-threonine kinase receptor-associated protein STRAP                           | Q9Y3F4     | 38  | 24  | 26  | 27  | 20  | 1.08    | 1.13    | 0.83    |
| 1748 | Serine-tRNA ligase, cytoplasmic SARS                                                | P49591     | 59  | 33  | 27  | 28  | 22  | 0.82    | 0.85    | 0.67    |
| 1749 | Serotransferrin TF                                                                  | P02787     | 77  | 45  | 41  | 24  | 21  | 0.91    | 0.53    | 0.47    |
| 1750 | Serpin B3 SERPINB3                                                                  | P29508     | 45  | 15  | 16  | 21  | 20  | 1.07    | 1.40    | 1.33    |
| 1751 | Serpin B5 SERPINB5                                                                  | P36952     | 42  | 136 | 118 | 131 | 132 | 0.87    | 0.96    | 0.97    |
| 1752 | Serpin B6 SERPINB6                                                                  | P35237     | 43  | 26  | 32  | 28  | 26  | 1.23    | 1.08    | 1.00    |
| 1753 | Serpin B8 SERPINB8                                                                  | P50452     | 43  | 0   | 8   | 5   | 5   | #DIV/0! | #DIV/0! | #DIV/0! |
| 1754 | Serpin H1 SERPINH1                                                                  | P50454     | 46  | 41  | 47  | 43  | 36  | 1.15    | 1.05    | 0.88    |
| 1755 | Serrate RNA effector molecule homolog SRRT                                          | Q9BXP5     | 101 | 7   | 7   | 3   | 6   | 1.00    | 0.43    | 0.86    |
| 1756 | Serum albumin ALB                                                                   | P02768     | 69  | 69  | 90  | 56  | 51  | 1.30    | 0.81    | 0.74    |
| 1757 | Serum paraoxonase/arylesterase 2 PON2                                               | Q15165     | 39  | 0   | 2   | 2   | 0   | #DIV/0! | #DIV/0! | #DIV/0! |
| 1758 | S-formylglutathione hydrolase ESD                                                   | P10768     | 31  | 24  | 22  | 29  | 27  | 0.92    | 1.21    | 1.13    |
| 1759 | SH3 domain-binding glutamic acid-rich-like protein SH3BGRL                          | O75368     | 13  | 7   | 3   | 5   | 6   | 0.43    | 0.71    | 0.86    |
| 1760 | SH3 domain-binding glutamic acid-rich-like protein 3 SH3BGRL3                       | Q9H299     | 10  | 14  | 13  | 16  | 17  | 0.93    | 1.14    | 1.21    |
| 1761 | SH3 domain-binding protein 1 SH3BP1                                                 | Q9Y3L3     | 76  | 3   | 0   | 3   | 0   | 0.00    | 1.00    | 0.00    |
| 1762 | SHC-transforming protein 1 SHC1                                                     | P29353     | 63  | 0   | 2   | 0   | 2   | #DIV/0! | #DIV/0! | #DIV/0! |
| 1763 | Shootin-1 KIAA1598                                                                  | A0M266     | 72  | 2   | 0   | 0   | 2   | 0.00    | 0.00    | 1.00    |
| 1764 | Sialic acid synthase NANS                                                           | Q9NR45     | 40  | 12  | 15  | 11  | 8   | 1.25    | 0.92    | 0.67    |
| 1765 | Sigma non-opioid intracellular receptor 1 SIGMAR1                                   | Q99720     | 25  | 3   | 2   | 6   | 0   | 0.67    | 2.00    | 0.00    |
| 1766 | Signal peptidase complex catalytic subunit SEC11A SEC11A                            | P67812     | 21  | 14  | 14  | 12  | 9   | 1.00    | 0.86    | 0.64    |
| 1767 | Signal peptidase complex subunit 2 SPCS2                                            | Q15005     | 25  | 9   | 6   | 4   | 7   | 0.67    | 0.44    | 0.78    |
| 1768 | Signal peptidase complex subunit 3 SPCS3                                            | P61009     | 20  | 8   | 8   | 6   | 7   | 1.00    | 0.75    | 0.88    |
| 1769 | Signal recognition particle 14 kDa protein SRP14                                    | P37108     | 15  | 11  | 14  | 7   | 10  | 1.27    | 0.64    | 0.91    |
| 1770 | Signal recognition particle 19 kDa protein SRP19                                    | P09132     | 16  | 11  | 11  | 9   | 9   | 1.00    | 0.82    | 0.82    |
| 1771 | Signal recognition particle 54 kDa protein SRP54                                    | P61011     | 56  | 7   | 11  | 7   | 10  | 1.57    | 1.00    | 1.43    |
| 1772 | Signal recognition particle 9 kDa protein SRP9                                      | P49458     | 10  | 6   | 9   | 5   | 8   | 1.50    | 0.83    | 1.33    |
| 1773 | Signal recognition particle receptor subunit alpha SRPR                             | P08240     | 70  | 0   | 0   | 2   | 3   | #DIV/0! | #DIV/0! | #DIV/0! |
| 1774 | Signal recognition particle receptor subunit beta SRPRB                             | Q9Y5M8     | 30  | 4   | 8   | 5   | 5   | 2.00    | 1.25    | 1.25    |
| 1775 | Signal recognition particle subunit SRP68 SRP68                                     | Q9UHB9     | 71  | 27  | 37  | 43  | 42  | 1.37    | 1.59    | 1.56    |
| 1776 | Signal recognition particle subunit SRP72 SRP72                                     | O76094     | 75  | 19  | 16  | 21  | 23  | 0.84    | 1.11    | 1.21    |
| 1777 | Signal transducer and activator of transcription 1-alpha/beta STAT1                 | P42224     | 87  | 14  | 30  | 14  | 13  | 2.14    | 1.00    | 0.93    |
| 1778 | Signal transducer and activator of transcription 3 STAT3                            | P40763     | 88  | 25  | 17  | 18  | 11  | 0.68    | 0.72    | 0.44    |
| 1779 | Signal transducer and activator of transcription 6 STAT6                            | P42226     | 94  | 0   | 2   | 0   | 0   | #DIV/0! | #DIV/0! | #DIV/0! |
| 1780 | Signal transducing adapter molecule 1 STAM                                          | Q92783     | 59  | 5   | 4   | 7   | 6   | 0.80    | 1.40    | 1.20    |
| 1781 | Signal transducing adapter molecule 2 STAM2                                         | O75886     | 58  | 0   | 5   | 4   | 6   | #DIV/0! | #DIV/0! | #DIV/0! |
| 1782 | Single-stranded DNA-binding protein, mitochondrial SSBP1                            | Q04837     | 17  | 16  | 11  | 23  | 18  | 0.69    | 1.44    | 1.13    |
| 1783 | Small glutamine-rich tetratricopeptide repeat-containing protein alpha SGTa         | O43765     | 34  | 4   | 9   | 7   | 4   | 2.25    | 1.75    | 1.00    |
| 1784 | Small integral membrane protein 13 SMIM13                                           | P0DJ93     | 10  | 0   | 0   | 2   | 0   | #DIV/0! | #DIV/0! | #DIV/0! |
| 1785 | Small nuclear ribonucleoprotein E SNRPE                                             | P62304     | 11  | 11  | 12  | 12  | 10  | 1.09    | 1.09    | 0.91    |
| 1786 | Small nuclear ribonucleoprotein F SNRPF                                             | P62306     | 10  | 4   | 7   | 4   | 6   | 1.75    | 1.00    | 1.50    |
| 1787 | Small nuclear ribonucleoprotein Sm D1 SNRPD1                                        | P62314     | 13  | 13  | 11  | 14  | 12  | 0.85    | 1.08    | 0.92    |
| 1788 | Small nuclear ribonucleoprotein Sm D2 SNRPD2                                        | P62316     | 14  | 31  | 28  | 30  | 17  | 0.90    | 0.97    | 0.55    |
| 1789 | Small nuclear ribonucleoprotein Sm D3 SNRPD3                                        | P62318     | 14  | 20  | 20  | 20  | 16  | 1.00    | 1.00    | 0.80    |
| 1790 | Small nuclear ribonucleoprotein-associated proteins B and B' SNRPB                  | P14678(+1) | 25  | 5   | 4   | 4   | 3   | 0.80    | 0.80    | 0.60    |
| 1791 | Small proline-rich protein 2D SPRR2D                                                | P22532     | 8   | 7   | 2   | 2   | 2   | 0.29    | 0.29    | 0.29    |
| 1792 | Small proline-rich protein 3 SPRR3                                                  | Q9UBC9     | 18  | 7   | 12  | 5   | 11  | 1.71    | 0.71    | 1.57    |
| 1793 | Small ubiquitin-related modifier 2 SUMO2                                            | P61956     | 11  | 0   | 0   | 4   | 3   | #DIV/0! | #DIV/0! | #DIV/0! |
| 1794 | S-methyl-5'-thioadenosine phosphorylase MTAP                                        | Q13126     | 31  | 29  | 22  | 30  | 35  | 0.76    | 1.03    | 1.21    |
| 1795 | SNARE-associated protein Snapin SNAPIN                                              | O95295     | 15  | 2   | 0   | 2   | 0   | 0.00    | 1.00    | 0.00    |
| 1796 | Sodium/potassium-transporting ATPase subunit alpha-1 ATP1A1                         | P05023     | 113 | 18  | 16  | 19  | 21  | 0.89    | 1.06    | 1.17    |
| 1797 | Sodium-coupled neutral amino acid transporter 2 SLC38A2                             | Q96QD8     | 56  | 3   | 3   | 7   | 7   | 1.00    | 2.33    | 2.33    |
| 1798 | Solute carrier family 12 member 4 SLC12A4                                           | Q9UP95     | 121 | 2   | 3   | 0   | 0   | 1.50    | 0.00    | 0.00    |
| 1799 | Solute carrier family 2, facilitated glucose transporter member 1 SLC2A1            | P11166     | 54  | 0   | 0   | 0   | 2   | #DIV/0! | #DIV/0! | #DIV/0! |
| 1800 | Sorbitol dehydrogenase SORD                                                         | Q00796     | 38  | 2   | 5   | 3   | 3   | 2.50    | 1.50    | 1.50    |
| 1801 | Sorcin SRI                                                                          | P30626     | 22  | 0   | 11  | 6   | 2   | #DIV/0! | #DIV/0! | #DIV/0! |

|      |                                                                               |        |     |     |     |     |     |         |         |         |
|------|-------------------------------------------------------------------------------|--------|-----|-----|-----|-----|-----|---------|---------|---------|
| 1802 | Sorting nexin-1 SNX1                                                          | Q13596 | 59  | 3   | 10  | 15  | 9   | 3.33    | 5.00    | 3.00    |
| 1803 | Sorting nexin-12 SNX12                                                        | Q9UMY4 | 20  | 10  | 11  | 10  | 10  | 1.10    | 1.00    | 1.00    |
| 1804 | Sorting nexin-2 SNX2                                                          | O60749 | 58  | 0   | 8   | 12  | 13  | #DIV/0! | #DIV/0! | #DIV/0! |
| 1805 | Sorting nexin-3 SNX3                                                          | O60493 | 19  | 17  | 19  | 19  | 15  | 1.12    | 1.12    | 0.88    |
| 1806 | Sorting nexin-6 SNX6                                                          | Q9UNH7 | 47  | 6   | 6   | 3   | 0   | 1.00    | 0.50    | 0.00    |
| 1807 | Sorting nexin-9 SNX9                                                          | Q9Y5X1 | 67  | 0   | 0   | 3   | 3   | #DIV/0! | #DIV/0! | #DIV/0! |
| 1808 | SPATS2-like protein SPATS2L                                                   | Q9NUQ6 | 62  | 0   | 2   | 0   | 0   | #DIV/0! | #DIV/0! | #DIV/0! |
| 1809 | Spectrin alpha chain, non-erythrocytic 1 SPTAN1                               | Q13813 | 285 | 510 | 360 | 338 | 338 | 0.71    | 0.66    | 0.66    |
| 1810 | Spectrin beta chain, non-erythrocytic 1 SPTBN1                                | Q01082 | 275 | 397 | 267 | 270 | 285 | 0.67    | 0.68    | 0.72    |
| 1811 | Spermidine synthase SRM                                                       | P19623 | 34  | 19  | 23  | 19  | 18  | 1.21    | 1.00    | 0.95    |
| 1812 | Spermine synthase SMS                                                         | P52788 | 41  | 8   | 9   | 3   | 7   | 1.13    | 0.38    | 0.88    |
| 1813 | S-phase kinase-associated protein 1 SKP1                                      | P63208 | 19  | 2   | 2   | 3   | 0   | 1.00    | 1.50    | 0.00    |
| 1814 | Spliceosome RNA helicase DDX39B DDX39B                                        | Q13838 | 49  | 44  | 35  | 53  | 44  | 0.80    | 1.20    | 1.00    |
| 1815 | Splicing factor 1 SF1                                                         | Q15637 | 68  | 0   | 3   | 0   | 3   | #DIV/0! | #DIV/0! | #DIV/0! |
| 1816 | Splicing factor 3A subunit 1 SF3A1                                            | Q15459 | 89  | 5   | 2   | 9   | 9   | 0.40    | 1.80    | 1.80    |
| 1817 | Splicing factor 3A subunit 3 SF3A3                                            | Q12874 | 59  | 4   | 0   | 4   | 0   | 0.00    | 1.00    | 0.00    |
| 1818 | Splicing factor 3B subunit 1 SF3B1                                            | O75533 | 146 | 16  | 28  | 42  | 37  | 1.75    | 2.63    | 2.31    |
| 1819 | Splicing factor 3B subunit 2 SF3B2                                            | Q13435 | 100 | 6   | 5   | 9   | 11  | 0.83    | 1.50    | 1.83    |
| 1820 | Splicing factor 3B subunit 3 SF3B3                                            | Q15393 | 136 | 11  | 15  | 20  | 15  | 1.36    | 1.82    | 1.36    |
| 1821 | Splicing factor 3B subunit 5 SF3B5                                            | Q9BWJ5 | 10  | 0   | 0   | 3   | 0   | #DIV/0! | #DIV/0! | #DIV/0! |
| 1822 | Splicing factor 3B subunit 6 SF3B6                                            | Q9Y3B4 | 15  | 5   | 7   | 9   | 7   | 1.40    | 1.80    | 1.40    |
| 1823 | Splicing factor U2AF 35 kDa subunit U2AF1                                     | Q01081 | 28  | 9   | 10  | 12  | 7   | 1.11    | 1.33    | 0.78    |
| 1824 | Splicing factor U2AF 65 kDa subunit U2AF2                                     | P26368 | 54  | 6   | 5   | 9   | 10  | 0.83    | 1.50    | 1.67    |
| 1825 | Splicing factor, proline- and glutamine-rich SFPQ                             | P23246 | 76  | 11  | 21  | 20  | 25  | 1.91    | 1.82    | 2.27    |
| 1826 | SPRY domain-containing protein 7 SPRYD7                                       | Q5W111 | 22  | 2   | 0   | 0   | 0   | 0.00    | 0.00    | 0.00    |
| 1827 | Squalene synthase FDF1                                                        | P37268 | 48  | 39  | 28  | 27  | 28  | 0.72    | 0.69    | 0.72    |
| 1828 | Squamous cell carcinoma antigen recognized by T-cells 3 SART3                 | Q15020 | 110 | 0   | 0   | 7   | 2   | #DIV/0! | #DIV/0! | #DIV/0! |
| 1829 | SRA stem-loop-interacting RNA-binding protein, mitochondrial SLIRP            | Q9GZT3 | 12  | 11  | 5   | 11  | 7   | 0.45    | 1.00    | 0.64    |
| 1830 | Src substrate cortactin CTN                                                   | Q14247 | 62  | 32  | 43  | 30  | 37  | 1.34    | 0.94    | 1.16    |
| 1831 | SRSF protein kinase 1 SRPK1                                                   | Q965B4 | 74  | 0   | 0   | 2   | 3   | #DIV/0! | #DIV/0! | #DIV/0! |
| 1832 | Staphylococcal nuclease domain-containing protein 1 SND1                      | Q7KZF4 | 102 | 52  | 49  | 46  | 49  | 0.94    | 0.88    | 0.94    |
| 1833 | Stathmin STMN1                                                                | P16949 | 17  | 8   | 7   | 2   | 0   | 0.88    | 0.25    | 0.00    |
| 1834 | STE20/SPS1-related proline-alanine-rich protein kinase STK39                  | Q9UEW8 | 59  | 0   | 0   | 0   | 2   | #DIV/0! | #DIV/0! | #DIV/0! |
| 1835 | STE20-like serine/threonine-protein kinase SLK                                | Q9H2G2 | 143 | 27  | 28  | 34  | 28  | 1.04    | 1.26    | 1.04    |
| 1836 | Sterol-4-alpha-carboxylate 3-dehydrogenase, decarboxylating NSDHL             | Q15738 | 42  | 18  | 15  | 18  | 12  | 0.83    | 1.00    | 0.67    |
| 1837 | Stomatin-like protein 2, mitochondrial STOML2                                 | Q9UJZ1 | 39  | 6   | 6   | 2   | 0   | 1.00    | 0.33    | 0.00    |
| 1838 | Stress-70 protein, mitochondrial HSPA9                                        | P38646 | 74  | 95  | 67  | 82  | 85  | 0.71    | 0.86    | 0.89    |
| 1839 | Stress-induced-phosphoprotein 1 STIP1                                         | P31948 | 63  | 54  | 43  | 66  | 66  | 0.80    | 1.22    | 1.22    |
| 1840 | Striatin STRN                                                                 | O43815 | 86  | 0   | 0   | 2   | 0   | #DIV/0! | #DIV/0! | #DIV/0! |
| 1841 | Striatin-interacting protein 1 STRIP1                                         | Q5VSL9 | 96  | 0   | 2   | 0   | 0   | #DIV/0! | #DIV/0! | #DIV/0! |
| 1842 | Stromal cell-derived factor 2-like protein 1 SDF2L1                           | Q9HCN8 | 24  | 4   | 2   | 0   | 0   | 0.50    | 0.00    | 0.00    |
| 1843 | Succinate dehydrogenase [ubiquinone] flavoprotein subunit, mitochondrial SDHA | P31040 | 73  | 2   | 7   | 8   | 10  | 3.50    | 4.00    | 5.00    |
| 1844 | Succinate dehydrogenase [ubiquinone] iron-sulfur subunit, mitochondrial SDHB  | P21912 | 32  | 2   | 5   | 5   | 5   | 2.50    | 2.50    | 2.50    |
| 1845 | Succinyl-CoA ligase [ADP/GDP-forming] subunit alpha, mitochondrial SUCLG1     | P53597 | 36  | 6   | 8   | 5   | 4   | 1.33    | 0.83    | 0.67    |
| 1846 | Succinyl-CoA ligase [GDP-forming] subunit beta, mitochondrial SUCLG2          | Q96199 | 47  | 2   | 3   | 5   | 4   | 1.50    | 2.50    | 2.00    |
| 1847 | Succinyl-CoA:3-ketoacid coenzyme A transferase 1, mitochondrial OXCT1         | P55809 | 56  | 0   | 0   | 0   | 2   | #DIV/0! | #DIV/0! | #DIV/0! |
| 1848 | Sulfatase-modifying factor 2 SUMF2                                            | Q8NB17 | 34  | 7   | 8   | 6   | 6   | 1.14    | 0.86    | 0.86    |
| 1849 | Sulfide:quinone oxidoreductase, mitochondrial SQRDL                           | Q9Y6N5 | 50  | 50  | 43  | 31  | 32  | 0.86    | 0.62    | 0.64    |
| 1850 | SUMO-activating enzyme subunit 1 SAE1                                         | Q9UBE0 | 38  | 6   | 6   | 5   | 3   | 1.00    | 0.83    | 0.50    |
| 1851 | SUMO-activating enzyme subunit 2 UBA2                                         | Q9UBT2 | 71  | 7   | 7   | 6   | 7   | 1.00    | 0.86    | 1.00    |
| 1852 | SUMO-conjugating enzyme UBC9 UBE2I                                            | P63279 | 18  | 4   | 4   | 5   | 3   | 1.00    | 1.25    | 0.75    |
| 1853 | Superkiller viralicidic activity 2-like 2 SKIV2L2                             | P42285 | 118 | 0   | 2   | 0   | 3   | #DIV/0! | #DIV/0! | #DIV/0! |
| 1854 | Superoxide dismutase [Cu-Zn] SOD1                                             | P00441 | 16  | 10  | 8   | 9   | 7   | 0.80    | 0.90    | 0.70    |
| 1855 | Superoxide dismutase [Mn], mitochondrial SOD2                                 | P04179 | 25  | 9   | 25  | 15  | 16  | 2.78    | 1.67    | 1.78    |
| 1856 | Suppressor of G2 allele of SKP1 homolog SUGT1                                 | Q9Y220 | 41  | 8   | 12  | 10  | 10  | 1.50    | 1.25    | 1.25    |
| 1857 | Surfeit locus protein 4 SURF4                                                 | O15260 | 30  | 16  | 19  | 24  | 22  | 1.19    | 1.50    | 1.38    |
| 1858 | Switch-associated protein 70 SWAP70                                           | Q9UH65 | 69  | 2   | 7   | 9   | 10  | 3.50    | 4.50    | 5.00    |
| 1859 | Symplekin SYMPK                                                               | Q92797 | 141 | 0   | 0   | 3   | 0   | #DIV/0! | #DIV/0! | #DIV/0! |
| 1860 | Synaptic vesicle membrane protein VAT-1 homolog VAT1                          | Q99536 | 42  | 31  | 33  | 34  | 27  | 1.06    | 1.10    | 0.87    |
| 1861 | Synaptobrevin homolog YKT6 YKT6                                               | O15498 | 22  | 16  | 16  | 19  | 14  | 1.00    | 1.19    | 0.88    |
| 1862 | Synaptogyrin-2 SYNGR2                                                         | O43760 | 25  | 5   | 3   | 6   | 4   | 0.60    | 1.20    | 0.80    |
| 1863 | Synaptotagmin-2-binding protein SYN2BP                                        | P57105 | 16  | 3   | 0   | 3   | 3   | 0.00    | 1.00    | 1.00    |
| 1864 | Synaptophysin-like protein 1 SYPL1                                            | Q16563 | 29  | 0   | 0   | 4   | 0   | #DIV/0! | #DIV/0! | #DIV/0! |
| 1865 | Synaptosomal-associated protein 23 SNAP23                                     | O00161 | 23  | 0   | 3   | 3   | 0   | #DIV/0! | #DIV/0! | #DIV/0! |
| 1866 | Syndecan-4 SDC4                                                               | P31431 | 22  | 2   | 14  | 3   | 0   | 7.00    | 1.50    | 0.00    |
| 1867 | Synembryon-A RIC8A                                                            | Q9NPC8 | 60  | 7   | 6   | 7   | 10  | 0.86    | 1.00    | 1.43    |
| 1868 | Syntaxin-12 STX12                                                             | Q86Y82 | 32  | 2   | 6   | 7   | 7   | 3.00    | 3.50    | 3.50    |
| 1869 | Syntaxin-7 STX7                                                               | O15400 | 30  | 9   | 8   | 6   | 5   | 0.89    | 0.67    | 0.56    |
| 1870 | Syntaxin-binding protein 2 STXB2P2                                            | Q15833 | 66  | 11  | 13  | 17  | 17  | 1.18    | 1.55    | 1.55    |
| 1871 | Syntaxin-binding protein 3 STXB3P3                                            | O00186 | 68  | 2   | 2   | 4   | 5   | 1.00    | 2.00    | 2.50    |
| 1872 | Syntenin-1 SDCBP                                                              | O00560 | 32  | 12  | 10  | 7   | 5   | 0.83    | 0.58    | 0.42    |
| 1873 | Syntenin-2 SDCBP2                                                             | Q9H190 | 32  | 0   | 3   | 0   | 3   | #DIV/0! | #DIV/0! | #DIV/0! |
| 1874 | Talin-1 TLN1                                                                  | Q9Y490 | 270 | 316 | 237 | 212 | 206 | 0.75    | 0.67    | 0.65    |
| 1875 | TAR DNA-binding protein 43 TARDBP                                             | Q13148 | 45  | 4   | 8   | 8   | 7   | 2.00    | 2.00    | 1.75    |
| 1876 | Target of Myb protein 1 TOM1                                                  | O60784 | 54  | 2   | 0   | 3   | 5   | 0.00    | 1.50    | 2.50    |
| 1877 | TATA-binding protein-associated factor 2N TAF15                               | Q92804 | 62  | 0   | 0   | 0   | 8   | #DIV/0! | #DIV/0! | #DIV/0! |
| 1878 | Tax1-binding protein 3 TAX1BP3                                                | O14907 | 14  | 8   | 6   | 8   | 6   | 0.75    | 1.00    | 0.75    |
| 1879 | TBC1 domain family member 15 TBC1D15                                          | Q8TC07 | 79  | 2   | 0   | 0   | 4   | 0.00    | 0.00    | 2.00    |
| 1880 | TBC1 domain family member 2A TBC1D2                                           | Q9BYX2 | 105 | 4   | 5   | 0   | 0   | 1.25    | 0.00    | 0.00    |
| 1881 | TBC1 domain family member 9B TBC1D9B                                          | Q66K14 | 141 | 0   | 0   | 3   | 0   | #DIV/0! | #DIV/0! | #DIV/0! |
| 1882 | T-complex protein 1 subunit alpha TCP1                                        | P17987 | 60  | 87  | 85  | 90  | 101 | 0.98    | 1.03    | 1.16    |
| 1883 | T-complex protein 1 subunit beta CCT2                                         | P78371 | 57  | 132 | 99  | 80  | 83  | 0.75    | 0.61    | 0.63    |

|      |                                                                       |             |     |     |     |     |     |         |         |         |
|------|-----------------------------------------------------------------------|-------------|-----|-----|-----|-----|-----|---------|---------|---------|
| 1884 | T-complex protein 1 subunit delta CCT4                                | P50991      | 58  | 83  | 81  | 74  | 58  | 0.98    | 0.89    | 0.70    |
| 1885 | T-complex protein 1 subunit epsilon CCT5                              | P48643      | 60  | 92  | 105 | 108 | 93  | 1.14    | 1.17    | 1.01    |
| 1886 | T-complex protein 1 subunit eta CCT7                                  | Q99832      | 59  | 68  | 75  | 72  | 71  | 1.10    | 1.06    | 1.04    |
| 1887 | T-complex protein 1 subunit gamma CCT3                                | P49368      | 61  | 70  | 76  | 66  | 75  | 1.09    | 0.94    | 1.07    |
| 1888 | T-complex protein 1 subunit theta CCT8                                | P50990      | 60  | 102 | 76  | 66  | 78  | 0.75    | 0.65    | 0.76    |
| 1889 | T-complex protein 1 subunit zeta CCT6A                                | P40227      | 58  | 75  | 74  | 74  | 70  | 0.99    | 0.99    | 0.93    |
| 1890 | T-complex protein 11-like protein 1 TCP11L1                           | Q9NUJ3      | 57  | 0   | 0   | 3   | 0   | #DIV/0! | #DIV/0! | #DIV/0! |
| 1891 | Tenascin TNC                                                          | P24821      | 241 | 0   | 2   | 0   | 0   | #DIV/0! | #DIV/0! | #DIV/0! |
| 1892 | Testin TES                                                            | Q9UGI8      | 48  | 35  | 34  | 30  | 38  | 0.97    | 0.86    | 1.09    |
| 1893 | Thimet oligopeptidase THOP1                                           | P52888      | 79  | 0   | 0   | 2   | 2   | #DIV/0! | #DIV/0! | #DIV/0! |
| 1894 | Thiopurine S-methyltransferase TPMT                                   | P51580      | 28  | 2   | 3   | 4   | 2   | 1.50    | 2.00    | 1.00    |
| 1895 | Thioredoxin TXN                                                       | P10599      | 12  | 40  | 32  | 39  | 32  | 0.80    | 0.98    | 0.80    |
| 1896 | Thioredoxin domain-containing protein 12 TXNDC12                      | Q95881      | 19  | 5   | 3   | 3   | 0   | 0.60    | 0.60    | 0.00    |
| 1897 | Thioredoxin domain-containing protein 17 TXNDC17                      | Q9BRA2      | 14  | 28  | 21  | 21  | 24  | 0.75    | 0.75    | 0.86    |
| 1898 | Thioredoxin domain-containing protein 5 TXNDC5                        | Q8NBS9      | 48  | 24  | 20  | 20  | 21  | 0.83    | 0.83    | 0.88    |
| 1899 | Thioredoxin domain-containing protein 9 TXNDC9                        | O14530      | 27  | 8   | 5   | 5   | 0   | 0.63    | 0.63    | 0.00    |
| 1900 | Thioredoxin reductase 1, cytoplasmic TXNRD1                           | Q16881      | 71  | 0   | 12  | 3   | 4   | #DIV/0! | #DIV/0! | #DIV/0! |
| 1901 | Thioredoxin-dependent peroxide reductase, mitochondrial PRDX3         | P30048      | 28  | 49  | 33  | 33  | 35  | 0.67    | 0.67    | 0.71    |
| 1902 | Thioredoxin-like protein 1 TXNL1                                      | O43396      | 32  | 7   | 12  | 10  | 7   | 1.71    | 1.43    | 1.00    |
| 1903 | Thioredoxin-related transmembrane protein 1 TMX1                      | Q9H3N1      | 32  | 15  | 11  | 11  | 14  | 0.73    | 0.73    | 0.93    |
| 1904 | Thiosulfate sulfurtransferase TST                                     | Q16762      | 33  | 0   | 0   | 3   | 0   | #DIV/0! | #DIV/0! | #DIV/0! |
| 1905 | THO complex subunit 4 ALYREF                                          | Q86V81      | 27  | 0   | 3   | 3   | 2   | #DIV/0! | #DIV/0! | #DIV/0! |
| 1906 | Threonine--tRNA ligase, cytoplasmic TARS                              | P26639      | 83  | 58  | 58  | 68  | 74  | 1.00    | 1.17    | 1.28    |
| 1907 | Thrombospondin-1 THBS1                                                | P07996      | 129 | 115 | 97  | 103 | 87  | 0.84    | 0.90    | 0.76    |
| 1908 | THUMP domain-containing protein 1 THUMP1                              | Q9NXX2      | 39  | 0   | 2   | 3   | 0   | #DIV/0! | #DIV/0! | #DIV/0! |
| 1909 | Thymidine phosphorylase TYMP                                          | P19971      | 50  | 7   | 6   | 10  | 12  | 0.86    | 1.43    | 1.71    |
| 1910 | Thymidylate kinase DTYMK                                              | P23919      | 24  | 11  | 11  | 10  | 4   | 1.00    | 0.91    | 0.36    |
| 1911 | Thymosin beta-10 TMSB10                                               | P63313      | 5   | 4   | 0   | 0   | 4   | 0.00    | 0.00    | 1.00    |
| 1912 | Thymosin beta-4 TMSB4X                                                | P62328      | 5   | 17  | 14  | 12  | 7   | 0.82    | 0.71    | 0.41    |
| 1913 | Thyroid adenoma-associated protein THADA                              | Q6VHU6      | 220 | 0   | 0   | 2   | 0   | #DIV/0! | #DIV/0! | #DIV/0! |
| 1914 | Thyroid hormone receptor-associated protein 3 THRAP3                  | Q9Y2W1      | 109 | 9   | 9   | 13  | 14  | 1.00    | 1.44    | 1.56    |
| 1915 | Thyroid receptor-interacting protein 6 TRIP6                          | Q15654      | 50  | 0   | 2   | 5   | 3   | #DIV/0! | #DIV/0! | #DIV/0! |
| 1916 | Tight junction protein ZO-1 TJP1                                      | Q07157      | 195 | 23  | 38  | 43  | 37  | 1.65    | 1.87    | 1.61    |
| 1917 | Tight junction protein ZO-2 TJP2                                      | Q9UDY2      | 134 | 18  | 34  | 34  | 30  | 1.89    | 1.89    | 1.67    |
| 1918 | TIP41-like protein TIPRL                                              | O75663      | 31  | 3   | 6   | 4   | 7   | 2.00    | 1.33    | 2.33    |
| 1919 | Tissue factor F3                                                      | P13726      | 33  | 37  | 34  | 27  | 26  | 0.92    | 0.73    | 0.70    |
| 1920 | TLD domain-containing protein 1 TLDC1                                 | Q6P9B6      | 51  | 8   | 11  | 10  | 8   | 1.38    | 1.25    | 1.00    |
| 1921 | Toll-interacting protein TOLLIP                                       | Q9H0E2      | 30  | 9   | 9   | 9   | 8   | 1.00    | 1.00    | 0.89    |
| 1922 | Torsin-1A-interacting protein 1 TOR1AIP1                              | Q5JTV8      | 66  | 6   | 8   | 6   | 6   | 1.33    | 1.00    | 1.00    |
| 1923 | Trafficking protein particle complex subunit 1 TRAPPC1                | Q9Y5R8      | 17  | 3   | 0   | 0   | 0   | 0.00    | 0.00    | 0.00    |
| 1924 | Trafficking protein particle complex subunit 2 TRAPPC2                | PODI81 (+1) | 16  | 3   | 2   | 3   | 4   | 0.67    | 1.00    | 1.33    |
| 1925 | Trafficking protein particle complex subunit 2-like protein TRAPPC2L  | Q9UL33      | 16  | 3   | 0   | 0   | 0   | 0.00    | 0.00    | 0.00    |
| 1926 | Trafficking protein particle complex subunit 3 TRAPPC3                | O43617      | 20  | 11  | 8   | 5   | 8   | 0.73    | 0.45    | 0.73    |
| 1927 | Trafficking protein particle complex subunit 4 TRAPPC4                | Q9Y296      | 24  | 4   | 0   | 3   | 3   | 0.00    | 0.75    | 0.75    |
| 1928 | Trafficking protein particle complex subunit 5 TRAPPC5                | Q8IUOR      | 21  | 3   | 3   | 3   | 0   | 1.00    | 1.00    | 0.00    |
| 1929 | Trafficking protein particle complex subunit 6B TRAPPC6B              | Q86S22      | 18  | 5   | 4   | 3   | 6   | 0.80    | 0.60    | 1.20    |
| 1930 | TRAF-type zinc finger domain-containing protein 1 TRAFD1              | O14545      | 65  | 0   | 2   | 0   | 0   | #DIV/0! | #DIV/0! | #DIV/0! |
| 1931 | Transaldolase TALDO1                                                  | P37837      | 38  | 50  | 52  | 47  | 34  | 1.04    | 0.94    | 0.68    |
| 1932 | Transcription and mRNA export factor ENY2 ENY2                        | Q9NPA8      | 12  | 4   | 0   | 3   | 0   | 0.00    | 0.75    | 0.00    |
| 1933 | Transcription elongation factor B polypeptide 1 TCEB1                 | Q15369      | 12  | 7   | 7   | 16  | 11  | 1.00    | 2.29    | 1.57    |
| 1934 | Transcription elongation factor B polypeptide 2 TCEB2                 | Q15370      | 13  | 16  | 10  | 9   | 11  | 0.63    | 0.56    | 0.69    |
| 1935 | Transcription factor BTF3 BTF3                                        | P20290      | 22  | 13  | 18  | 15  | 16  | 1.38    | 1.15    | 1.23    |
| 1936 | Transcription factor BTF3 homolog 4 BTF3L4                            | Q96K17      | 17  | 0   | 2   | 0   | 0   | #DIV/0! | #DIV/0! | #DIV/0! |
| 1937 | Transcription factor p65 RELA                                         | Q04206      | 60  | 0   | 4   | 5   | 3   | #DIV/0! | #DIV/0! | #DIV/0! |
| 1938 | Transcription intermediary factor 1-beta TRIM28                       | Q13263      | 89  | 21  | 23  | 27  | 27  | 1.10    | 1.29    | 1.29    |
| 1939 | Transcriptional activator protein Pur-alpha PURA                      | Q00577      | 35  | 0   | 2   | 3   | 0   | #DIV/0! | #DIV/0! | #DIV/0! |
| 1940 | Transcriptional activator protein Pur-beta PURB                       | Q96QR8      | 33  | 0   | 0   | 2   | 0   | #DIV/0! | #DIV/0! | #DIV/0! |
| 1941 | Transferrin receptor protein 1 TFR3                                   | P02786      | 85  | 13  | 14  | 24  | 21  | 1.08    | 1.85    | 1.62    |
| 1942 | Transformer-2 protein homolog beta TRA2B                              | P62995      | 34  | 7   | 5   | 4   | 7   | 0.71    | 0.57    | 1.00    |
| 1943 | Transforming growth factor beta-1-induced transcript 1 protein TGFBI1 | O43294      | 50  | 0   | 3   | 3   | 0   | #DIV/0! | #DIV/0! | #DIV/0! |
| 1944 | Transforming growth factor-beta-induced protein ig-h3 TGFBI           | Q15582      | 75  | 9   | 14  | 13  | 12  | 1.56    | 1.44    | 1.33    |
| 1945 | Transforming protein RhoA RHOA                                        | P61586      | 22  | 73  | 75  | 71  | 100 | 1.03    | 0.97    | 1.37    |
| 1946 | Transgelin TAGLN                                                      | Q01995      | 23  | 100 | 106 | 109 | 95  | 1.06    | 1.09    | 0.95    |
| 1947 | Transgelin-2 TAGLN2                                                   | P37802      | 22  | 147 | 167 | 142 | 140 | 1.14    | 0.97    | 0.95    |
| 1948 | Transitional endoplasmic reticulum ATPase VCP                         | P55072      | 89  | 212 | 144 | 140 | 157 | 0.68    | 0.66    | 0.74    |
| 1949 | Transketolase TKT                                                     | P29401      | 68  | 178 | 154 | 213 | 186 | 0.87    | 1.20    | 1.04    |
| 1950 | Translation initiation factor eIF-2B subunit alpha EIF2B1             | Q14232      | 34  | 10  | 10  | 5   | 3   | 1.00    | 0.50    | 0.30    |
| 1951 | Translation initiation factor eIF-2B subunit beta EIF2B2              | P49770      | 39  | 5   | 0   | 5   | 3   | 0.00    | 1.00    | 0.60    |
| 1952 | Translation initiation factor eIF-2B subunit delta EIF2B4             | Q9UI10      | 58  | 0   | 0   | 0   | 2   | #DIV/0! | #DIV/0! | #DIV/0! |
| 1953 | Translation initiation factor eIF-2B subunit epsilon EIF2B5           | Q13144      | 80  | 2   | 0   | 0   | 0   | 0.00    | 0.00    | 0.00    |
| 1954 | Translation machinery-associated protein 7 TMA7                       | Q9Y256      | 7   | 10  | 0   | 10  | 6   | 0.00    | 1.00    | 0.60    |
| 1955 | Translational activator GCN1 GCN1L1                                   | Q92616      | 293 | 51  | 68  | 69  | 74  | 1.33    | 1.35    | 1.45    |
| 1956 | Translational activator of cytochrome c oxidase 1 TACO1               | Q9BSH4      | 32  | 0   | 2   | 0   | 0   | #DIV/0! | #DIV/0! | #DIV/0! |
| 1957 | Translational-controlled tumor protein TPT1                           | P13693      | 20  | 30  | 29  | 31  | 29  | 0.97    | 1.03    | 0.97    |
| 1958 | Translin TSN                                                          | Q15631      | 26  | 13  | 16  | 15  | 9   | 1.23    | 1.15    | 0.69    |
| 1959 | Translin-associated protein X TSNA1                                   | Q99598      | 33  | 5   | 6   | 7   | 4   | 1.20    | 1.40    | 0.80    |
| 1960 | Translocon-associated protein subunit alpha SSR1                      | P43307      | 32  | 0   | 4   | 5   | 3   | #DIV/0! | #DIV/0! | #DIV/0! |
| 1961 | Translocon-associated protein subunit delta SSR4                      | P51571      | 19  | 14  | 10  | 14  | 13  | 0.71    | 1.00    | 0.93    |
| 1962 | Transmembrane 9 superfamily member 2 TM9SF2                           | Q99805      | 76  | 0   | 4   | 4   | 0   | #DIV/0! | #DIV/0! | #DIV/0! |
| 1963 | Transmembrane 9 superfamily member 3 TM9SF3                           | Q9HD45      | 68  | 0   | 0   | 2   | 2   | #DIV/0! | #DIV/0! | #DIV/0! |
| 1964 | Transmembrane and coiled-coil domain-containing protein 1 TMCO1       | Q9UM00      | 21  | 7   | 5   | 0   | 0   | 0.71    | 0.00    | 0.00    |
| 1965 | Transmembrane emp24 domain-containing protein 1 TMED1                 | Q13445      | 25  | 2   | 2   | 2   | 0   | 1.00    | 1.00    | 0.00    |

|      |                                                                             |        |     |     |     |     |     |         |         |         |
|------|-----------------------------------------------------------------------------|--------|-----|-----|-----|-----|-----|---------|---------|---------|
| 1966 | Transmembrane emp24 domain-containing protein 10 TMED10                     | P49755 | 25  | 41  | 33  | 33  | 40  | 0.80    | 0.80    | 0.98    |
| 1967 | Transmembrane emp24 domain-containing protein 2 TMED2                       | Q15363 | 23  | 20  | 20  | 17  | 30  | 1.00    | 0.85    | 1.50    |
| 1968 | Transmembrane emp24 domain-containing protein 3 TMED3                       | Q9Y303 | 25  | 0   | 0   | 4   | 3   | #DIV/0! | #DIV/0! | #DIV/0! |
| 1969 | Transmembrane emp24 domain-containing protein 4 TMED4                       | Q7Z7H5 | 26  | 6   | 6   | 5   | 7   | 1.00    | 0.83    | 1.17    |
| 1970 | Transmembrane emp24 domain-containing protein 5 TMED5                       | Q9Y3A6 | 26  | 8   | 6   | 7   | 5   | 0.75    | 0.88    | 0.63    |
| 1971 | Transmembrane emp24 domain-containing protein 7 TMED7                       | Q9Y3B3 | 25  | 9   | 11  | 11  | 9   | 1.22    | 1.22    | 1.00    |
| 1972 | Transmembrane emp24 domain-containing protein 9 TMED9                       | Q9BVK6 | 27  | 15  | 20  | 15  | 16  | 1.33    | 1.00    | 1.07    |
| 1973 | Transmembrane protein 109 TMEM109                                           | Q9BVC6 | 26  | 2   | 0   | 0   | 4   | 0.00    | 0.00    | 2.00    |
| 1974 | Transmembrane protein 189 TMEM189                                           | A5PLL7 | 31  | 0   | 0   | 3   | 0   | #DIV/0! | #DIV/0! | #DIV/0! |
| 1975 | Transmembrane protein 199 TMEM199                                           | Q8N511 | 23  | 2   | 0   | 0   | 0   | 0.00    | 0.00    | 0.00    |
| 1976 | Transmembrane protein 256 TMEM256                                           | Q8N2U0 | 12  | 3   | 0   | 0   | 0   | 0.00    | 0.00    | 0.00    |
| 1977 | Transmembrane protein 33 TMEM33                                             | P57088 | 28  | 4   | 0   | 3   | 3   | 0.00    | 0.75    | 0.75    |
| 1978 | Transmembrane protein 40 TMEM40                                             | Q8WWA1 | 25  | 15  | 10  | 18  | 19  | 0.67    | 1.20    | 1.27    |
| 1979 | Transmembrane protein 43 TMEM43                                             | Q9BTV4 | 45  | 5   | 2   | 2   | 2   | 0.40    | 0.40    | 0.40    |
| 1980 | Transportin-1 TNPO1                                                         | Q92973 | 102 | 26  | 30  | 30  | 33  | 1.15    | 1.15    | 1.27    |
| 1981 | Transportin-2 TNPO2                                                         | O14787 | 101 | 0   | 9   | 0   | 0   | #DIV/0! | #DIV/0! | #DIV/0! |
| 1982 | Transportin-3 TNPO3                                                         | Q9Y5L0 | 104 | 4   | 0   | 4   | 2   | 0.00    | 1.00    | 0.50    |
| 1983 | Trifunctional enzyme subunit alpha, mitochondrial HADHA                     | P40939 | 83  | 31  | 45  | 50  | 50  | 1.45    | 1.61    | 1.61    |
| 1984 | Trifunctional enzyme subunit beta, mitochondrial HADHB                      | P55084 | 51  | 10  | 12  | 8   | 13  | 1.20    | 0.80    | 1.30    |
| 1985 | Trifunctional purine biosynthetic protein adenosine-3 GART                  | P22102 | 108 | 43  | 37  | 38  | 38  | 0.86    | 0.88    | 0.88    |
| 1986 | Triosephosphate isomerase TPI1                                              | P60174 | 31  | 121 | 133 | 115 | 140 | 1.10    | 0.95    | 1.16    |
| 1987 | Tripartite motif-containing protein 16 TRIM16                               | O95361 | 64  | 11  | 9   | 13  | 18  | 0.82    | 1.18    | 1.64    |
| 1988 | Tripartite motif-containing protein 29 TRIM29                               | Q14134 | 66  | 18  | 17  | 22  | 24  | 0.94    | 1.22    | 1.33    |
| 1989 | Tripeptidyl-peptidase 1 TPP1                                                | O14773 | 61  | 0   | 0   | 2   | 0   | #DIV/0! | #DIV/0! | #DIV/0! |
| 1990 | Tripeptidyl-peptidase 2 TPP2                                                | P29144 | 138 | 0   | 12  | 16  | 14  | #DIV/0! | #DIV/0! | #DIV/0! |
| 1991 | Triple functional domain protein TRIO                                       | O75962 | 347 | 0   | 2   | 0   | 2   | #DIV/0! | #DIV/0! | #DIV/0! |
| 1992 | tRNA (cytosine(34)-C(5))-methyltransferase NSUN2                            | Q08J23 | 86  | 8   | 11  | 7   | 8   | 1.38    | 0.88    | 1.00    |
| 1993 | tRNA (guanine(26)-N(2))-dimethyltransferase TRMT1                           | Q9NXH9 | 72  | 0   | 2   | 0   | 0   | #DIV/0! | #DIV/0! | #DIV/0! |
| 1994 | tRNA pseudouridine synthase A, mitochondrial PUS1                           | Q9Y606 | 47  | 0   | 0   | 2   | 0   | #DIV/0! | #DIV/0! | #DIV/0! |
| 1995 | tRNA-splicing ligase RtcB homolog RTCB                                      | Q9Y310 | 55  | 5   | 6   | 10  | 11  | 1.20    | 2.00    | 2.20    |
| 1996 | Trophoblast glycoprotein TPBG                                               | Q13641 | 46  | 3   | 0   | 0   | 2   | 0.00    | 0.00    | 0.67    |
| 1997 | Tropomodulin-3 TMOD3                                                        | Q9NYL9 | 40  | 14  | 9   | 10  | 10  | 0.64    | 0.71    | 0.71    |
| 1998 | Tropomyosin alpha-1 chain TPM1                                              | P09493 | 33  | 29  | 29  | 33  | 29  | 1.00    | 1.14    | 1.00    |
| 1999 | Tropomyosin alpha-3 chain TPM3                                              | P06753 | 33  | 34  | 39  | 43  | 45  | 1.15    | 1.26    | 1.32    |
| 2000 | Tropomyosin alpha-4 chain TPM4                                              | P67936 | 29  | 73  | 79  | 80  | 92  | 1.08    | 1.10    | 1.26    |
| 2001 | Tryptophan--tRNA ligase, cytoplasmic WARS                                   | P23381 | 53  | 34  | 31  | 23  | 29  | 0.91    | 0.68    | 0.85    |
| 2002 | Tubulin alpha-1B chain TUBA1B                                               | P68363 | 50  | 294 | 333 | 301 | 359 | 1.13    | 1.02    | 1.22    |
| 2003 | Tubulin alpha-1C chain TUBA1C                                               | Q9BQE3 | 50  | 323 | 343 | 334 | 361 | 1.06    | 1.03    | 1.12    |
| 2004 | Tubulin alpha-4A chain TUBA4A                                               | P68366 | 50  | 247 | 221 | 220 | 247 | 0.89    | 0.89    | 1.00    |
| 2005 | Tubulin beta chain TUBB                                                     | P07437 | 50  | 364 | 354 | 367 | 386 | 0.97    | 1.01    | 1.06    |
| 2006 | Tubulin beta-2B chain TUBB2B                                                | Q9BVA1 | 50  | 125 | 124 | 194 | 196 | 0.99    | 1.55    | 1.57    |
| 2007 | Tubulin beta-3 chain TUBB3                                                  | Q13509 | 50  | 190 | 193 | 164 | 184 | 1.02    | 0.86    | 0.97    |
| 2008 | Tubulin beta-4A chain TUBB4A                                                | P04350 | 50  | 179 | 175 | 199 | 195 | 0.98    | 1.11    | 1.09    |
| 2009 | Tubulin beta-4B chain TUBB4B                                                | P68371 | 50  | 270 | 272 | 286 | 288 | 1.01    | 1.06    | 1.07    |
| 2010 | Tubulin beta-6 chain TUBB6                                                  | Q9BVF5 | 50  | 165 | 141 | 154 | 175 | 0.85    | 0.93    | 1.06    |
| 2011 | Tubulin-folding cofactor B TBCB                                             | Q99426 | 27  | 14  | 13  | 12  | 10  | 0.93    | 0.86    | 0.71    |
| 2012 | Tubulin-specific chaperone A TBCA                                           | O75347 | 13  | 12  | 5   | 7   | 3   | 0.42    | 0.58    | 0.25    |
| 2013 | Tubulin-specific chaperone D TBCE                                           | Q9BTV9 | 133 | 0   | 2   | 2   | 0   | #DIV/0! | #DIV/0! | #DIV/0! |
| 2014 | Tubulin--tyrosine ligase-like protein 12 TLL12                              | Q14166 | 74  | 15  | 10  | 21  | 20  | 0.67    | 1.40    | 1.33    |
| 2015 | Tumor necrosis factor receptor type 1-associated DEATH domain protein TRADD | Q15628 | 34  | 0   | 3   | 5   | 4   | #DIV/0! | #DIV/0! | #DIV/0! |
| 2016 | Tumor protein D52 TPD52                                                     | P55327 | 24  | 4   | 8   | 9   | 5   | 2.00    | 2.25    | 1.25    |
| 2017 | Tumor protein D54 TPD52L2                                                   | O43399 | 22  | 12  | 24  | 27  | 22  | 2.00    | 2.25    | 1.83    |
| 2018 | Tumor suppressor candidate 2 TUSC2                                          | O75896 | 12  | 0   | 0   | 0   | 2   | #DIV/0! | #DIV/0! | #DIV/0! |
| 2019 | Tumor susceptibility gene 101 protein TSG101                                | Q99816 | 44  | 4   | 3   | 5   | 7   | 0.75    | 1.25    | 1.75    |
| 2020 | Tumor-associated calcium signal transducer 2 TACSTD2                        | P09758 | 36  | 4   | 7   | 10  | 9   | 1.75    | 2.50    | 2.25    |
| 2021 | Twinfilin-1 TWF1                                                            | Q12792 | 40  | 21  | 20  | 15  | 12  | 0.95    | 0.71    | 0.57    |
| 2022 | Twinfilin-2 TWF2                                                            | Q6IB50 | 40  | 11  | 15  | 20  | 16  | 1.36    | 1.82    | 1.45    |
| 2023 | Type II inositol 3,4-bisphosphate 4-phosphatase INPP4B                      | O15327 | 105 | 3   | 5   | 5   | 3   | 1.67    | 1.67    | 1.00    |
| 2024 | Tyrosine-protein kinase CSK CSK                                             | P41240 | 51  | 2   | 2   | 0   | 0   | 1.00    | 0.00    | 0.00    |
| 2025 | Tyrosine-protein phosphatase non-receptor type 1 PTPN1                      | P18031 | 50  | 4   | 7   | 8   | 8   | 1.75    | 2.00    | 2.00    |
| 2026 | Tyrosine-protein phosphatase non-receptor type 11 PTPN11                    | Q06124 | 68  | 13  | 23  | 18  | 21  | 1.77    | 1.38    | 1.62    |
| 2027 | Tyrosine-protein phosphatase non-receptor type 12 PTPN12                    | Q05209 | 88  | 3   | 0   | 3   | 3   | 0.00    | 1.00    | 1.00    |
| 2028 | Tyrosine-protein phosphatase non-receptor type 23 PTPN23                    | Q9H357 | 179 | 4   | 2   | 2   | 2   | 0.50    | 0.50    | 0.50    |
| 2029 | Tyrosine--tRNA ligase, cytoplasmic YARS                                     | P54577 | 59  | 26  | 35  | 29  | 30  | 1.35    | 1.12    | 1.15    |
| 2030 | U1 small nuclear ribonucleoprotein 70 kDa SNRNP70                           | P08621 | 52  | 4   | 3   | 5   | 4   | 0.75    | 1.25    | 1.00    |
| 2031 | U1 small nuclear ribonucleoprotein A SNRPA                                  | P09012 | 31  | 6   | 6   | 12  | 8   | 1.00    | 2.00    | 1.33    |
| 2032 | U1 small nuclear ribonucleoprotein C SNRPC                                  | P09234 | 17  | 4   | 0   | 4   | 0   | 0.00    | 1.00    | 0.00    |
| 2033 | U2 small nuclear ribonucleoprotein A' SNRPA1                                | P09661 | 28  | 8   | 12  | 10  | 17  | 1.50    | 1.25    | 2.13    |
| 2034 | U2 small nuclear ribonucleoprotein B' SNRPB2                                | P08579 | 25  | 3   | 4   | 6   | 4   | 1.33    | 2.00    | 1.33    |
| 2035 | U2 snRNP-associated SURP motif-containing protein U2SURP                    | O15042 | 118 | 0   | 0   | 7   | 5   | #DIV/0! | #DIV/0! | #DIV/0! |
| 2036 | U4/U6 small nuclear ribonucleoprotein Prp31 PRPF31                          | Q8WVY3 | 55  | 0   | 0   | 2   | 0   | #DIV/0! | #DIV/0! | #DIV/0! |
| 2037 | U4/U6.U5 tri-snRNP-associated protein 2 USP39                               | Q53G59 | 65  | 0   | 2   | 2   | 0   | #DIV/0! | #DIV/0! | #DIV/0! |
| 2038 | U5 small nuclear ribonucleoprotein 200 kDa helicase SNRNP200                | O75643 | 245 | 25  | 33  | 35  | 38  | 1.32    | 1.40    | 1.52    |
| 2039 | U6 snRNA-associated Sm-like protein LSm1 LSM1                               | O15116 | 15  | 3   | 0   | 0   | 0   | 0.00    | 0.00    | 0.00    |
| 2040 | U6 snRNA-associated Sm-like protein LSm2 LSM2                               | Q9Y333 | 11  | 9   | 12  | 12  | 12  | 1.33    | 1.33    | 1.33    |
| 2041 | U6 snRNA-associated Sm-like protein LSm3 LSM3                               | P62310 | 12  | 3   | 0   | 2   | 2   | 0.00    | 0.67    | 0.67    |
| 2042 | U6 snRNA-associated Sm-like protein LSm4 LSM4                               | Q9Y420 | 15  | 10  | 9   | 11  | 7   | 0.90    | 1.10    | 0.70    |
| 2043 | U6 snRNA-associated Sm-like protein LSm6 LSM6                               | P62312 | 9   | 3   | 10  | 7   | 2   | 3.33    | 2.33    | 0.67    |
| 2044 | U6 snRNA-associated Sm-like protein LSm8 LSM8                               | O95777 | 10  | 3   | 0   | 0   | 0   | 0.00    | 0.00    | 0.00    |
| 2045 | Ubiquitin-1 UBQLN1                                                          | Q9UMX0 | 63  | 7   | 4   | 11  | 8   | 0.57    | 1.57    | 1.14    |
| 2046 | Ubiquitin-2 UBQLN2                                                          | Q9UHD9 | 66  | 0   | 5   | 6   | 3   | #DIV/0! | #DIV/0! | #DIV/0! |
| 2047 | Ubiquitin carboxyl-terminal hydrolase 14 USP14                              | P54578 | 56  | 34  | 24  | 31  | 29  | 0.71    | 0.91    | 0.85    |



|      |                                                                                   |         |     |     |     |     |     |         |         |         |
|------|-----------------------------------------------------------------------------------|---------|-----|-----|-----|-----|-----|---------|---------|---------|
| 2048 | Ubiquitin carboxyl-terminal hydrolase 24 USP24                                    | Q9UPU5  | 294 | 0   | 3   | 3   | 3   | #DIV/0! | #DIV/0! | #DIV/0! |
| 2049 | Ubiquitin carboxyl-terminal hydrolase 47 USP47                                    | Q96K76  | 157 | 0   | 10  | 7   | 7   | #DIV/0! | #DIV/0! | #DIV/0! |
| 2050 | Ubiquitin carboxyl-terminal hydrolase 5 USP5                                      | P45974  | 96  | 37  | 33  | 31  | 27  | 0.89    | 0.84    | 0.73    |
| 2051 | Ubiquitin carboxyl-terminal hydrolase 7 USP7                                      | Q93009  | 128 | 5   | 6   | 14  | 10  | 1.20    | 2.80    | 2.00    |
| 2052 | Ubiquitin carboxyl-terminal hydrolase isozyme L1 UCHL1                            | P09936  | 25  | 9   | 14  | 9   | 3   | 1.56    | 1.00    | 0.33    |
| 2053 | Ubiquitin carboxyl-terminal hydrolase isozyme L3 UCHL3                            | P15374  | 26  | 11  | 17  | 14  | 18  | 1.55    | 1.27    | 1.64    |
| 2054 | Ubiquitin carboxyl-terminal hydrolase isozyme L5 UCHL5                            | Q9Y5K5  | 38  | 4   | 3   | 0   | 3   | 0.75    | 0.00    | 0.75    |
| 2055 | Ubiquitin conjugation factor E4 B UBE4B                                           | O95155  | 146 | 0   | 0   | 3   | 0   | #DIV/0! | #DIV/0! | #DIV/0! |
| 2056 | Ubiquitin fusion degradation protein 1 homolog UFD1L                              | Q92890  | 35  | 7   | 6   | 10  | 11  | 0.86    | 1.43    | 1.57    |
| 2057 | Ubiquitin thioesterase OTUB1 OTUB1                                                | Q96FW1  | 31  | 20  | 17  | 22  | 19  | 0.85    | 1.10    | 0.95    |
| 2058 | Ubiquitin thioesterase otulin OTULIN                                              | Q96BN8  | 40  | 2   | 2   | 0   | 0   | 1.00    | 0.00    | 0.00    |
| 2059 | Ubiquitin-40S ribosomal protein S27a RPS27A                                       | P62979  | 18  | 95  | 105 | 109 | 103 | 1.11    | 1.15    | 1.08    |
| 2060 | Ubiquitin-associated and SH3 domain-containing protein B UBASH3B                  | Q8TF42  | 73  | 0   | 0   | 0   | 2   | #DIV/0! | #DIV/0! | #DIV/0! |
| 2061 | Ubiquitin-associated protein 2-like UBAP2L                                        | Q14157  | 115 | 3   | 9   | 9   | 9   | 3.00    | 3.00    | 3.00    |
| 2062 | Ubiquitin-conjugating enzyme E2 D2 UBE2D2                                         | P62837  | 17  | 7   | 7   | 9   | 8   | 1.00    | 1.29    | 1.14    |
| 2063 | Ubiquitin-conjugating enzyme E2 G1 UBE2G1                                         | P62253  | 20  | 4   | 0   | 2   | 0   | 0.00    | 0.50    | 0.00    |
| 2064 | Ubiquitin-conjugating enzyme E2 H UBE2H                                           | P62256  | 21  | 5   | 4   | 6   | 3   | 0.80    | 1.20    | 0.60    |
| 2065 | Ubiquitin-conjugating enzyme E2 K UBE2K                                           | P61086  | 22  | 21  | 19  | 20  | 14  | 0.90    | 0.95    | 0.67    |
| 2066 | Ubiquitin-conjugating enzyme E2 L3 UBE2L3                                         | P68036  | 18  | 25  | 23  | 24  | 21  | 0.92    | 0.96    | 0.84    |
| 2067 | Ubiquitin-conjugating enzyme E2 N UBE2N                                           | P61088  | 17  | 35  | 37  | 39  | 31  | 1.06    | 1.11    | 0.89    |
| 2068 | Ubiquitin-conjugating enzyme E2 R2 UBE2R2                                         | Q712K3  | 27  | 0   | 0   | 0   | 3   | #DIV/0! | #DIV/0! | #DIV/0! |
| 2069 | Ubiquitin-conjugating enzyme E2 variant 1 UBE2V1                                  | Q13404  | 16  | 25  | 19  | 21  | 29  | 0.76    | 0.84    | 1.16    |
| 2070 | Ubiquitin-conjugating enzyme E2 variant 2 UBE2V2                                  | Q15819  | 16  | 15  | 16  | 15  | 0   | 1.07    | 1.00    | 0.00    |
| 2071 | Ubiquitin-conjugating enzyme E2 Z UBE2Z                                           | Q9H832  | 38  | 0   | 2   | 3   | 0   | #DIV/0! | #DIV/0! | #DIV/0! |
| 2072 | Ubiquitin-fold modifier 1 UFM1                                                    | P61960  | 9   | 6   | 6   | 8   | 6   | 1.00    | 1.33    | 1.00    |
| 2073 | Ubiquitin-fold modifier-conjugating enzyme 1 UFC1                                 | Q9Y3C8  | 19  | 3   | 3   | 2   | 0   | 1.00    | 0.67    | 0.00    |
| 2074 | Ubiquitin-like domain-containing CTD phosphatase 1 UBLCP1                         | Q8WVY7  | 37  | 7   | 0   | 0   | 0   | 0.00    | 0.00    | 0.00    |
| 2075 | Ubiquitin-like modifier-activating enzyme 1 UBA1                                  | P22314  | 118 | 163 | 170 | 177 | 165 | 1.04    | 1.09    | 1.01    |
| 2076 | Ubiquitin-like modifier-activating enzyme 6 UBA6                                  | A0AVT1  | 118 | 30  | 36  | 31  | 33  | 1.20    | 1.03    | 1.10    |
| 2077 | Ubiquitin-like modifier-activating enzyme ATG7 ATG7                               | O95352  | 78  | 0   | 3   | 2   | 0   | #DIV/0! | #DIV/0! | #DIV/0! |
| 2078 | Ubiquitin-like protein 5 UBL5                                                     | Q98ZL1  | 9   | 7   | 3   | 7   | 3   | 0.43    | 1.00    | 0.43    |
| 2079 | Ubiquitin-like protein ISG15 ISG15                                                | P05161  | 18  | 7   | 5   | 3   | 4   | 0.71    | 0.43    | 0.57    |
| 2080 | Ubiquitin-protein ligase E3A UBE3A                                                | Q05086  | 101 | 0   | 3   | 0   | 0   | #DIV/0! | #DIV/0! | #DIV/0! |
| 2081 | Ubiquitin-protein ligase E3C UBE3C                                                | Q15386  | 124 | 5   | 3   | 0   | 0   | 0.60    | 0.00    | 0.00    |
| 2082 | UBX domain-containing protein 1 UBXN1                                             | Q04323  | 33  | 9   | 8   | 8   | 6   | 0.89    | 0.89    | 0.67    |
| 2083 | UBX domain-containing protein 4 UBXN4                                             | Q92575  | 57  | 0   | 3   | 4   | 3   | #DIV/0! | #DIV/0! | #DIV/0! |
| 2084 | UDP-glucose 4-epimerase GALE                                                      | Q14376  | 38  | 15  | 21  | 15  | 16  | 1.40    | 1.00    | 1.07    |
| 2085 | UDP-glucose 6-dehydrogenase UGDH                                                  | O60701  | 55  | 26  | 18  | 22  | 28  | 0.69    | 0.85    | 1.08    |
| 2086 | UDP-glucose:glycoprotein glucosyltransferase 1 UGGT1                              | Q9NYU2  | 177 | 42  | 34  | 41  | 38  | 0.81    | 0.98    | 0.90    |
| 2087 | UDP-N-acetylglucosamine-peptide N-acetylglucosaminyltransferase 110 kDa subunit C | O15294  | 117 | 0   | 3   | 2   | 0   | #DIV/0! | #DIV/0! | #DIV/0! |
| 2088 | UDP-N-acetylhexosamine pyrophosphorylase UAP1                                     | Q16222  | 59  | 10  | 14  | 6   | 12  | 1.40    | 0.60    | 1.20    |
| 2089 | UMP-CMP kinase CMPK1                                                              | P30085  | 22  | 35  | 27  | 36  | 25  | 0.77    | 1.03    | 0.71    |
| 2090 | Uncharacterized protein C2orf47, mitochondrial C2orf47                            | Q8WVWC4 | 33  | 0   | 0   | 3   | 3   | #DIV/0! | #DIV/0! | #DIV/0! |
| 2091 | Uncharacterized protein C7orf50 C7orf50                                           | Q9BRJ6  | 22  | 0   | 2   | 0   | 0   | #DIV/0! | #DIV/0! | #DIV/0! |
| 2092 | Unconventional myosin-1b MYO1B                                                    | O43795  | 132 | 44  | 52  | 50  | 52  | 1.18    | 1.14    | 1.18    |
| 2093 | Unconventional myosin-1c MYO1C                                                    | O00159  | 122 | 50  | 45  | 35  | 38  | 0.90    | 0.70    | 0.76    |
| 2094 | Unconventional myosin-1d MYO1D                                                    | O94832  | 116 | 3   | 3   | 0   | 2   | 1.00    | 0.00    | 0.67    |
| 2095 | Unconventional myosin-1e MYO1E                                                    | Q12965  | 127 | 17  | 13  | 12  | 9   | 0.76    | 0.71    | 0.53    |
| 2096 | Unconventional myosin-1xb MYO9B                                                   | Q13459  | 243 | 0   | 0   | 2   | 0   | #DIV/0! | #DIV/0! | #DIV/0! |
| 2097 | Unconventional myosin-Va MYO5A                                                    | Q9Y411  | 215 | 2   | 0   | 0   | 0   | 0.00    | 0.00    | 0.00    |
| 2098 | Unconventional myosin-VI MYO6                                                     | Q9UM54  | 150 | 9   | 19  | 27  | 29  | 2.11    | 3.00    | 3.22    |
| 2099 | Unconventional myosin-XVIIIa MYO18A                                               | Q92614  | 233 | 2   | 0   | 3   | 3   | 0.00    | 1.50    | 1.50    |
| 2100 | UPF0160 protein MYG1, mitochondrial C12orf10                                      | Q9HB07  | 42  | 0   | 0   | 3   | 3   | #DIV/0! | #DIV/0! | #DIV/0! |
| 2101 | UPF0364 protein C6orf211 C6orf211                                                 | Q9H993  | 51  | 3   | 0   | 3   | 4   | 0.00    | 1.00    | 1.33    |
| 2102 | UPF0553 protein C9orf64 C9orf64                                                   | Q576V5  | 39  | 0   | 3   | 2   | 2   | #DIV/0! | #DIV/0! | #DIV/0! |
| 2103 | UPF0554 protein C2orf43 C2orf43                                                   | Q9H6V9  | 37  | 0   | 3   | 3   | 2   | #DIV/0! | #DIV/0! | #DIV/0! |
| 2104 | UPF0556 protein C19orf10 C19orf10                                                 | Q969H8  | 19  | 15  | 14  | 13  | 18  | 0.93    | 0.87    | 1.20    |
| 2105 | UPF0568 protein C14orf166 C14orf166                                               | Q9Y224  | 28  | 19  | 21  | 17  | 24  | 1.11    | 0.89    | 1.26    |
| 2106 | UPF0585 protein C16orf13 C16orf13                                                 | Q96519  | 23  | 0   | 0   | 3   | 0   | #DIV/0! | #DIV/0! | #DIV/0! |
| 2107 | UPF0696 protein C11orf68 C11orf68                                                 | Q9H3H3  | 27  | 3   | 3   | 2   | 0   | 1.00    | 0.67    | 0.00    |
| 2108 | Up-regulated during skeletal muscle growth protein 5 USMG5                        | Q961X5  | 6   | 5   | 7   | 5   | 4   | 1.40    | 1.00    | 0.80    |
| 2109 | Uridine 5'-monophosphate synthase UMPS                                            | P11172  | 52  | 0   | 0   | 0   | 2   | #DIV/0! | #DIV/0! | #DIV/0! |
| 2110 | Uridine phosphorylase 1 UPP1                                                      | Q16831  | 34  | 12  | 14  | 9   | 6   | 1.17    | 0.75    | 0.50    |
| 2111 | Uridine-cytidine kinase 2 UCK2                                                    | Q9BZX2  | 29  | 0   | 0   | 2   | 0   | #DIV/0! | #DIV/0! | #DIV/0! |
| 2112 | Uroporphyrinogen decarboxylase UROD                                               | P06132  | 41  | 7   | 6   | 4   | 6   | 0.86    | 0.57    | 0.86    |
| 2113 | UTP-glucose-1-phosphate uridylyltransferase UGP2                                  | Q16851  | 57  | 30  | 31  | 34  | 39  | 1.03    | 1.13    | 1.30    |
| 2114 | UV excision repair protein RAD23 homolog B RAD23B                                 | P54727  | 43  | 17  | 11  | 14  | 7   | 0.65    | 0.82    | 0.41    |
| 2115 | Vacuolar ATPase assembly integral membrane protein VMA21 VMA21                    | Q3ZAQ7  | 11  | 6   | 0   | 0   | 0   | 0.00    | 0.00    | 0.00    |
| 2116 | Vacuolar protein sorting-associated protein 13C VPS13C                            | Q709C8  | 422 | 0   | 0   | 0   | 2   | #DIV/0! | #DIV/0! | #DIV/0! |
| 2117 | Vacuolar protein sorting-associated protein 16 homolog VPS16                      | Q9H269  | 95  | 2   | 0   | 0   | 0   | 0.00    | 0.00    | 0.00    |
| 2118 | Vacuolar protein sorting-associated protein 26A VPS26A                            | O75436  | 38  | 11  | 14  | 17  | 11  | 1.27    | 1.55    | 1.00    |
| 2119 | Vacuolar protein sorting-associated protein 28 homolog VPS28                      | Q9UK41  | 25  | 4   | 0   | 8   | 8   | 0.00    | 2.00    | 2.00    |
| 2120 | Vacuolar protein sorting-associated protein 29 VPS29                              | Q9UBQ0  | 21  | 11  | 15  | 13  | 20  | 1.36    | 1.18    | 1.82    |
| 2121 | Vacuolar protein sorting-associated protein 35 VPS35                              | Q96QK1  | 92  | 59  | 56  | 62  | 58  | 0.95    | 1.05    | 0.98    |
| 2122 | Vacuolar protein sorting-associated protein 45 VPS45                              | Q9NRW7  | 65  | 3   | 3   | 3   | 0   | 1.00    | 1.00    | 0.00    |
| 2123 | Vacuolar protein sorting-associated protein 4A VPS4A                              | Q9JN37  | 49  | 0   | 0   | 10  | 11  | #DIV/0! | #DIV/0! | #DIV/0! |
| 2124 | Vacuolar protein sorting-associated protein 4B VPS4B                              | O75351  | 49  | 21  | 14  | 19  | 22  | 0.67    | 0.90    | 1.05    |
| 2125 | Vacuolar protein sorting-associated protein VTA1 homolog VTA1                     | Q9NP79  | 34  | 3   | 7   | 4   | 4   | 2.33    | 1.33    | 1.33    |
| 2126 | Vacuolar protein-sorting-associated protein 25 VPS25                              | Q9BRG1  | 21  | 9   | 6   | 6   | 6   | 0.67    | 0.67    | 0.67    |
| 2127 | Vacuolar protein-sorting-associated protein 36 VPS36                              | Q86VN1  | 44  | 2   | 0   | 0   | 0   | 0.00    | 0.00    | 0.00    |
| 2128 | Vacuolar-sorting protein SNF8 SNF8                                                | Q96H20  | 29  | 0   | 2   | 0   | 0   | #DIV/0! | #DIV/0! | #DIV/0! |
| 2129 | Valine--tRNA ligase VARS                                                          | P26640  | 140 | 41  | 56  | 67  | 56  | 1.37    | 1.63    | 1.37    |



|      |                                                                       |        |     |     |     |     |     |         |         |         |
|------|-----------------------------------------------------------------------|--------|-----|-----|-----|-----|-----|---------|---------|---------|
| 2130 | Vasodilator-stimulated phosphoprotein VASP                            | P50552 | 40  | 16  | 15  | 19  | 11  | 0.94    | 1.19    | 0.69    |
| 2131 | Very long-chain specific acyl-CoA dehydrogenase, mitochondrial ACADVL | P49748 | 70  | 4   | 6   | 6   | 8   | 1.50    | 1.50    | 2.00    |
| 2132 | Very-long-chain enoyl-CoA reductase TECR                              | Q9NZ01 | 36  | 3   | 2   | 10  | 5   | 0.67    | 3.33    | 1.67    |
| 2133 | Vesicle transport through interaction with t-SNAREs homolog 1B VTI1B  | Q9JEU0 | 27  | 0   | 0   | 2   | 0   | #DIV/0! | #DIV/0! | #DIV/0! |
| 2134 | Vesicle-associated membrane protein 3 VAMP3                           | Q15836 | 11  | 20  | 16  | 15  | 19  | 0.80    | 0.75    | 0.95    |
| 2135 | Vesicle-associated membrane protein 7 VAMP7                           | P51809 | 25  | 2   | 3   | 2   | 0   | 1.50    | 1.00    | 0.00    |
| 2136 | Vesicle-associated membrane protein 8 VAMP8                           | Q9BV40 | 11  | 25  | 26  | 28  | 23  | 1.04    | 1.12    | 0.92    |
| 2137 | Vesicle-associated membrane protein-associated protein A VAPA         | Q9P0L0 | 28  | 18  | 19  | 22  | 23  | 1.06    | 1.22    | 1.28    |
| 2138 | Vesicle-associated membrane protein-associated protein B/C VAPB       | O95292 | 27  | 9   | 11  | 13  | 9   | 1.22    | 1.44    | 1.00    |
| 2139 | Vesicle-fusing ATPase NSF                                             | P46459 | 83  | 0   | 2   | 4   | 0   | #DIV/0! | #DIV/0! | #DIV/0! |
| 2140 | Vesicle-trafficking protein SEC22b SEC22B                             | O75396 | 25  | 17  | 13  | 11  | 8   | 0.76    | 0.65    | 0.47    |
| 2141 | Vesicular integral-membrane protein VIP36 LMAN2                       | Q12907 | 40  | 8   | 10  | 11  | 11  | 1.25    | 1.38    | 1.38    |
| 2142 | Vigilin HDLBP                                                         | Q00341 | 141 | 17  | 35  | 40  | 44  | 2.06    | 2.35    | 2.59    |
| 2143 | Vimentin VIM                                                          | P08670 | 54  | 256 | 157 | 189 | 170 | 0.61    | 0.74    | 0.66    |
| 2144 | Vinculin VCL                                                          | P18206 | 124 | 163 | 181 | 147 | 181 | 1.11    | 0.90    | 1.11    |
| 2145 | Voltage-dependent anion-selective channel protein 1 VDAC1             | P21796 | 31  | 5   | 3   | 3   | 0   | 0.60    | 0.60    | 0.00    |
| 2146 | Voltage-dependent anion-selective channel protein 2 VDAC2             | P45880 | 32  | 3   | 5   | 2   | 2   | 1.67    | 0.67    | 0.67    |
| 2147 | von Willebrand factor A domain-containing protein 5A VWFA5A           | O00534 | 86  | 0   | 4   | 2   | 0   | #DIV/0! | #DIV/0! | #DIV/0! |
| 2148 | V-type proton ATPase catalytic subunit A ATP6V1A                      | P38606 | 68  | 23  | 38  | 32  | 34  | 1.65    | 1.39    | 1.48    |
| 2149 | V-type proton ATPase subunit B, brain isoform ATP6V1B2                | P21281 | 57  | 13  | 14  | 11  | 16  | 1.08    | 0.85    | 1.23    |
| 2150 | V-type proton ATPase subunit C 1 ATP6V1C1                             | P21283 | 44  | 5   | 4   | 5   | 4   | 0.80    | 1.00    | 0.80    |
| 2151 | V-type proton ATPase subunit D ATP6V1D                                | Q9Y5K8 | 28  | 7   | 12  | 7   | 6   | 1.71    | 1.00    | 0.86    |
| 2152 | V-type proton ATPase subunit d 1 ATP6V0D1                             | P61421 | 40  | 4   | 7   | 4   | 6   | 1.75    | 1.00    | 1.50    |
| 2153 | V-type proton ATPase subunit E 1 ATP6V1E1                             | P36543 | 26  | 15  | 13  | 9   | 8   | 0.87    | 0.60    | 0.53    |
| 2154 | V-type proton ATPase subunit F ATP6V1F                                | Q16864 | 13  | 2   | 0   | 0   | 0   | 0.00    | 0.00    | 0.00    |
| 2155 | V-type proton ATPase subunit G 1 ATP6V1G1                             | O75348 | 14  | 3   | 0   | 6   | 4   | 0.00    | 2.00    | 1.33    |
| 2156 | V-type proton ATPase subunit H ATP6V1H                                | Q9UI12 | 56  | 4   | 4   | 3   | 4   | 1.00    | 0.75    | 1.00    |
| 2157 | WASH complex subunit 7 KIAA1033                                       | Q2M389 | 136 | 0   | 3   | 0   | 0   | #DIV/0! | #DIV/0! | #DIV/0! |
| 2158 | WASH complex subunit strumpellin KIAA0196                             | Q12768 | 134 | 4   | 4   | 0   | 4   | 1.00    | 0.00    | 1.00    |
| 2159 | WD repeat-containing protein 1 WDR1                                   | O75083 | 66  | 78  | 88  | 94  | 84  | 1.13    | 1.21    | 1.08    |
| 2160 | WD repeat-containing protein 11 WDR11                                 | Q9BZH6 | 137 | 0   | 2   | 2   | 0   | #DIV/0! | #DIV/0! | #DIV/0! |
| 2161 | WD repeat-containing protein 26 WDR26                                 | Q9H7D7 | 72  | 0   | 0   | 0   | 2   | #DIV/0! | #DIV/0! | #DIV/0! |
| 2162 | WD repeat-containing protein 44 WDR44                                 | Q5JSH3 | 101 | 2   | 0   | 0   | 3   | 0.00    | 0.00    | 1.50    |
| 2163 | WD repeat-containing protein 47 WDR47                                 | O94967 | 102 | 0   | 0   | 0   | 2   | #DIV/0! | #DIV/0! | #DIV/0! |
| 2164 | WD repeat-containing protein 82 WDR82                                 | Q6UXN9 | 35  | 0   | 6   | 0   | 0   | #DIV/0! | #DIV/0! | #DIV/0! |
| 2165 | Wiskott-Aldrich syndrome protein family member 2 WASF2                | Q9Y6W5 | 54  | 0   | 6   | 4   | 5   | #DIV/0! | #DIV/0! | #DIV/0! |
| 2166 | Xaa-Pro aminopeptidase 1 XPNPEP1                                      | Q9NQW7 | 70  | 12  | 13  | 12  | 13  | 1.08    | 1.00    | 1.08    |
| 2167 | Xaa-Pro dipeptidase PEPD                                              | P12955 | 55  | 3   | 0   | 3   | 0   | 0.00    | 1.00    | 0.00    |
| 2168 | X-ray repair cross-complementing protein 5 XRCC5                      | P13010 | 83  | 43  | 42  | 49  | 51  | 0.98    | 1.14    | 1.19    |
| 2169 | X-ray repair cross-complementing protein 6 XRCC6                      | P12956 | 70  | 69  | 62  | 64  | 73  | 0.90    | 0.93    | 1.06    |
| 2170 | Y-box-binding protein 3 YBX3                                          | P16989 | 40  | 0   | 14  | 12  | 11  | #DIV/0! | #DIV/0! | #DIV/0! |
| 2171 | YrdC domain-containing protein, mitochondrial YRDC                    | Q86U90 | 29  | 0   | 0   | 2   | 0   | #DIV/0! | #DIV/0! | #DIV/0! |
| 2172 | YTH domain-containing family protein 2 YTHDF2                         | Q9Y5A9 | 62  | 0   | 0   | 3   | 4   | #DIV/0! | #DIV/0! | #DIV/0! |
| 2173 | YTH domain-containing family protein 3 YTHDF3                         | Q72739 | 64  | 0   | 2   | 4   | 4   | #DIV/0! | #DIV/0! | #DIV/0! |
| 2174 | Zinc finger CCH domain-containing protein 18 ZC3H18                   | Q86VM9 | 106 | 0   | 0   | 2   | 0   | #DIV/0! | #DIV/0! | #DIV/0! |
| 2175 | Zinc finger protein 185 ZNF185                                        | O15231 | 74  | 19  | 15  | 25  | 16  | 0.79    | 1.32    | 0.84    |
| 2176 | Zinc finger protein ZPR1 ZPR1                                         | O75312 | 51  | 3   | 0   | 0   | 0   | 0.00    | 0.00    | 0.00    |
| 2177 | Zinc finger ZZ-type and EF-hand domain-containing protein 1 ZZEF1     | O43149 | 331 | 3   | 0   | 0   | 0   | 0.00    | 0.00    | 0.00    |
| 2178 | Zyxin ZYX                                                             | Q15942 | 61  | 55  | 39  | 38  | 32  | 0.71    | 0.69    | 0.58    |

Table with columns: N, Compound, CmpidID, Pathway, medfdr, parent, medfdr, ISO No. cells, ISO No. cells, HTS No. cells, HTS No. cells, Isochem, Isochem, Isochem, Hetero, Hetero, Hypertonic saline, Hypertonic saline, Hypertonic saline, Hypertonic saline.

Legend table with colored boxes corresponding to metabolic pathways: Amino acids, Nucleotides, Biotin, TCA cycle, Nitrate Phosphate Pathway, GSH homeostasis, Serine biochemistry and one-carbon metabolism, New cell and polymer, Antimicrobials, Antioxidants and metabolism, Arginine and proline metabolism, Cofactor synthesis, Phenoxanthone metabolism.

| Table 3. Metabolomics analysis of cell extracts under isotonic or hypertonic saline treatment, in presence or absence of cytoxin |          |        |            |       |          |                  |         |         |         |         |         |         |         |         |         |                    |         |         |         |         |                   |         |          |          |          |                             |          |          |          |          |          |          |          |          |          |          |          |          |          |          |          |          |          |          |          |          |          |          |          |          |          |          |          |          |          |          |          |          |          |          |          |          |          |          |          |          |          |          |          |          |          |          |          |          |          |          |          |          |          |          |          |          |          |          |          |          |          |          |          |          |          |          |          |          |          |          |          |          |          |          |          |          |          |          |          |          |          |          |          |          |          |          |          |          |          |          |          |          |          |          |          |          |          |          |          |          |          |          |          |          |          |          |          |          |          |          |          |          |
|----------------------------------------------------------------------------------------------------------------------------------|----------|--------|------------|-------|----------|------------------|---------|---------|---------|---------|---------|---------|---------|---------|---------|--------------------|---------|---------|---------|---------|-------------------|---------|----------|----------|----------|-----------------------------|----------|----------|----------|----------|----------|----------|----------|----------|----------|----------|----------|----------|----------|----------|----------|----------|----------|----------|----------|----------|----------|----------|----------|----------|----------|----------|----------|----------|----------|----------|----------|----------|----------|----------|----------|----------|----------|----------|----------|----------|----------|----------|----------|----------|----------|----------|----------|----------|----------|----------|----------|----------|----------|----------|----------|----------|----------|----------|----------|----------|----------|----------|----------|----------|----------|----------|----------|----------|----------|----------|----------|----------|----------|----------|----------|----------|----------|----------|----------|----------|----------|----------|----------|----------|----------|----------|----------|----------|----------|----------|----------|----------|----------|----------|----------|----------|----------|----------|----------|----------|----------|----------|----------|----------|----------|----------|----------|----------|----------|----------|----------|----------|
| N                                                                                                                                | compound | CmpID1 | Pathway    | medRt | parent   | Isotonic control |         |         |         |         |         |         |         |         |         | Isotonic + cytoxin |         |         |         |         | Hypertonic saline |         |          |          |          | Hypertonic saline + cytoxin |          |          |          |          |          |          |          |          |          |          |          |          |          |          |          |          |          |          |          |          |          |          |          |          |          |          |          |          |          |          |          |          |          |          |          |          |          |          |          |          |          |          |          |          |          |          |          |          |          |          |          |          |          |          |          |          |          |          |          |          |          |          |          |          |          |          |          |          |          |          |          |          |          |          |          |          |          |          |          |          |          |          |          |          |          |          |          |          |          |          |          |          |          |          |          |          |          |          |          |          |          |          |          |          |          |          |          |          |          |          |          |          |
|                                                                                                                                  |          |        |            |       |          | ISO_1            | ISO_2   | ISO_3   | ISO_4   | ISO_5   | ISO_6   | ISO_7   | ISO_8   | ISO_9   | ISO_10  | ISO_11             | ISO_12  | ISO_13  | ISO_14  | ISO_15  | ISO_16            | ISO_17  | ISO_18   | ISO_19   | ISO_20   | ISO_21                      | ISO_22   | ISO_23   | ISO_24   | ISO_25   | ISO_26   | ISO_27   | ISO_28   | ISO_29   | ISO_30   | ISO_31   | ISO_32   | ISO_33   | ISO_34   | ISO_35   | ISO_36   | ISO_37   | ISO_38   | ISO_39   | ISO_40   | ISO_41   | ISO_42   | ISO_43   | ISO_44   | ISO_45   | ISO_46   | ISO_47   | ISO_48   | ISO_49   | ISO_50   | ISO_51   | ISO_52   | ISO_53   | ISO_54   | ISO_55   | ISO_56   | ISO_57   | ISO_58   | ISO_59   | ISO_60   | ISO_61   | ISO_62   | ISO_63   | ISO_64   | ISO_65   | ISO_66   | ISO_67   | ISO_68   | ISO_69   | ISO_70   | ISO_71   | ISO_72   | ISO_73   | ISO_74   | ISO_75   | ISO_76   | ISO_77   | ISO_78   | ISO_79   | ISO_80   | ISO_81   | ISO_82   | ISO_83   | ISO_84   | ISO_85   | ISO_86   | ISO_87   | ISO_88   | ISO_89   | ISO_90   | ISO_91   | ISO_92   | ISO_93   | ISO_94   | ISO_95   | ISO_96   | ISO_97   | ISO_98   | ISO_99   | ISO_100  |          |          |          |          |          |          |          |          |          |          |          |          |          |          |          |          |          |          |          |          |          |          |          |          |          |          |          |          |          |          |          |          |          |
| 1                                                                                                                                | Alanine  | C00041 | Aminoacids | +     | 90.05542 | 122334           | 9.11105 | 8.62206 | 8.73206 | 8.83906 | 8.93206 | 9.02506 | 9.12206 | 9.21506 | 9.31206 | 9.40506            | 9.50206 | 9.59506 | 9.68806 | 9.78506 | 9.87806           | 9.97506 | 10.06806 | 10.16506 | 10.25806 | 10.35506                    | 10.44806 | 10.54506 | 10.63806 | 10.73506 | 10.82806 | 10.92506 | 11.01806 | 11.11506 | 11.20806 | 11.30506 | 11.40206 | 11.49506 | 11.58806 | 11.68506 | 11.77806 | 11.87506 | 11.96806 | 12.06506 | 12.15806 | 12.25506 | 12.34806 | 12.44506 | 12.53806 | 12.63506 | 12.72806 | 12.82506 | 12.91806 | 13.01506 | 13.10806 | 13.20506 | 13.29806 | 13.39506 | 13.48806 | 13.58506 | 13.67806 | 13.77506 | 13.86806 | 13.96506 | 14.05806 | 14.15506 | 14.24806 | 14.34506 | 14.43806 | 14.53506 | 14.62806 | 14.72506 | 14.81806 | 14.91506 | 15.00806 | 15.10506 | 15.20206 | 15.29506 | 15.38806 | 15.48506 | 15.57806 | 15.67506 | 15.76806 | 15.86506 | 15.95806 | 16.05506 | 16.14806 | 16.24506 | 16.33806 | 16.43506 | 16.52806 | 16.62506 | 16.71806 | 16.81506 | 16.90806 | 17.00506 | 17.10206 | 17.19506 | 17.28806 | 17.38506 | 17.47806 | 17.57506 | 17.66806 | 17.76506 | 17.85806 | 17.95506 | 18.04806 | 18.14506 | 18.24206 | 18.33506 | 18.43206 | 18.52506 | 18.61806 | 18.71506 | 18.80806 | 18.90506 | 19.00206 | 19.09506 | 19.18806 | 19.28506 | 19.37806 | 19.47506 | 19.56806 | 19.66506 | 19.75806 | 19.85506 | 19.94806 | 20.04506 | 20.13806 | 20.23506 | 20.32806 | 20.42506 | 20.51806 | 20.61506 | 20.70806 | 20.80506 | 20.90206 | 21.00000 |

|     |                                    |         |                                    |   |          |          |          |          |          |          |          |          |          |          |          |          |          |          |          |          |          |          |          |          |          |          |          |          |          |          |          |          |
|-----|------------------------------------|---------|------------------------------------|---|----------|----------|----------|----------|----------|----------|----------|----------|----------|----------|----------|----------|----------|----------|----------|----------|----------|----------|----------|----------|----------|----------|----------|----------|----------|----------|----------|----------|
| 100 | N-Acetyl-L-citrulline              | C15532  | Arginine and proline metabolism    | - | 216.0974 | 1.223572 | 5.09E+04 | 1.89E+04 | 1.25E+04 | 0.00E+00 | 2.61E+04 | 6.71E+04 | 5.18E+04 | 9.34E+04 | 6.30E+04 | 1.16E+04 | 0.00E+00 | 0.00E+00 | 2.49E+04 | 0.00E+00 | 1.16E+04 | 5.74E+04 | 0.00E+00 | 5.35E+04 | 2.16E+04 | 1.21E+04 | 1.89E+04 | 6.30E+04 | 0.00E+00 | 2.16E+04 | 2.16E+04 |          |
| 101 | N-Acetylornithine                  | C00437  | Arginine and proline metabolism    | + | 176.1074 | 1.23581  | 2.51E+05 | 2.24E+05 | 1.83E+05 | 2.00E+05 | 1.88E+05 | 2.49E+05 | 2.99E+05 | 2.22E+05 | 2.16E+05 | 2.43E+05 | 1.54E+05 | 1.90E+05 | 2.41E+05 | 1.81E+05 | 1.65E+05 | 2.05E+05 | 2.94E+05 | 2.70E+05 | 3.26E+05 | 2.62E+05 | 2.00E+05 | 2.43E+05 | 1.81E+05 | 2.70E+05 | 2.70E+05 |          |
| 102 | N-Succinyl-L-citrulline            | C18048  | Arginine and proline metabolism    | + | 276.1184 | 1.226493 | 1.68E+05 | 1.47E+05 | 1.45E+05 | 1.75E+05 | 1.44E+05 | 2.20E+05 | 1.77E+05 | 3.32E+05 | 2.21E+05 | 2.43E+05 | 1.87E+05 | 1.54E+05 | 1.93E+05 | 2.07E+05 | 1.29E+05 | 1.88E+05 | 1.22E+05 | 1.88E+05 | 1.66E+05 | 1.15E+05 | 1.29E+05 | 1.47E+05 | 2.21E+05 | 1.87E+05 | 2.49E+05 | 2.49E+05 |
| 103 | Guanidinoacetate                   | C00581  | Arginine and proline metabolism    | + | 118.0012 | 1.221125 | 3.08E+04 | 1.21E+04 | 0.00E+00 | 2.30E+04 | 1.95E+04 | 4.42E+04 | 3.97E+04 | 3.03E+04 | 5.51E+04 | 7.93E+04 | 5.54E+04 | 3.30E+04 | 4.69E+04 | 2.01E+04 | 2.72E+04 | 1.51E+04 | 4.85E+04 | 1.95E+04 | 5.48E+04 | 9.67E+04 | 1.85E+04 | 5.42E+04 | 3.20E+04 | 4.85E+04 | 4.85E+04 |          |
| 104 | trans-4-Hydroxy-L-proline          | C00157  | Arginine and proline metabolism    | + | 132.0054 | 1.265345 | 6.61E+05 | 5.26E+05 | 6.35E+05 | 4.90E+05 | 4.98E+05 | 7.47E+05 | 8.44E+05 | 8.22E+05 | 8.26E+05 | 8.56E+05 | 6.18E+05 | 6.04E+05 | 5.48E+05 | 6.00E+05 | 7.01E+05 | 5.74E+05 | 5.79E+05 | 3.96E+05 | 5.75E+05 | 5.55E+05 | 5.26E+05 | 8.26E+05 | 6.04E+05 | 5.74E+05 | 5.74E+05 |          |
| 105 | sn-Glycerol 3-phosphate            | C00093  | Glycerophospholipid biosynthesis   | + | 113.0326 | 1.852923 | 1.13E+05 | 1.24E+05 | 1.29E+05 | 1.38E+05 | 1.26E+05 | 2.00E+05 | 2.60E+05 | 2.30E+05 | 2.31E+05 | 1.18E+05 | 1.43E+05 | 1.39E+05 | 1.44E+05 | 1.31E+05 | 1.58E+05 | 1.48E+05 | 1.41E+05 | 1.67E+05 | 1.56E+05 | 1.43E+05 | 1.56E+05 | 1.26E+05 | 2.89E+05 | 1.39E+05 | 1.55E+05 | 1.55E+05 |
| 106 | N-Methylethanolamine phosphate     | C001210 | Glycerophospholipid biosynthesis   | + | 156.0418 | 1.197072 | 1.25E+05 | 1.52E+05 | 6.97E+04 | 1.16E+05 | 1.53E+05 | 2.84E+05 | 2.50E+05 | 3.90E+05 | 3.73E+05 | 3.03E+05 | 1.62E+05 | 8.92E+04 | 1.72E+05 | 1.53E+05 | 1.49E+05 | 9.22E+04 | 1.04E+05 | 8.77E+04 | 1.02E+05 | 1.10E+05 | 1.25E+05 | 3.03E+05 | 1.53E+05 | 1.02E+05 | 1.02E+05 |          |
| 107 | sn-Glycerol 2-phosphoethanolamine  | C001233 | Glycerophospholipid biosynthesis   | + | 216.0625 | 1.286686 | 4.02E+05 | 4.33E+05 | 3.61E+05 | 3.53E+05 | 3.61E+05 | 4.18E+05 | 4.22E+05 | 4.48E+05 | 4.66E+05 | 4.12E+05 | 9.64E+05 | 8.75E+05 | 8.58E+05 | 8.69E+05 | 8.81E+05 | 7.88E+05 | 6.94E+05 | 7.32E+05 | 6.61E+05 | 6.65E+05 | 3.61E+05 | 4.22E+05 | 8.75E+05 | 6.94E+05 | 6.94E+05 |          |
| 108 | D-3-Choline                        | C00307  | Glycerophospholipid biosynthesis   | + | 489.1124 | 1.338888 | 7.05E+04 | 1.18E+04 | 2.01E+04 | 2.83E+04 | 5.98E+03 | 3.75E+04 | 2.39E+04 | 3.55E+04 | 2.12E+04 | 1.18E+04 | 2.21E+04 | 1.81E+04 | 8.51E+03 | 2.22E+04 | 2.56E+04 | 2.80E+04 | 2.85E+04 | 1.35E+04 | 1.61E+04 | 3.46E+04 | 2.01E+04 | 2.39E+04 | 2.22E+04 | 1.63E+04 | 1.63E+04 |          |
| 109 | D-3-Ethanolamine                   | C00570  | Glycerophospholipid biosynthesis   | + | 447.0056 | 1.570135 | 8.28E+03 | 5.63E+03 | 7.18E+03 | 1.38E+04 | 0.00E+00 | 1.94E+04 | 8.23E+03 | 1.14E+04 | 1.17E+04 | 8.30E+03 | 3.59E+04 | 3.21E+04 | 2.51E+04 | 2.95E+04 | 2.87E+04 | 5.98E+04 | 4.17E+04 | 2.47E+04 | 1.09E+04 | 1.46E+04 | 7.18E+03 | 1.14E+04 | 2.89E+04 | 2.47E+04 | 2.47E+04 |          |
| 110 | Ethanolamine phosphate             | C00946  | Glycerophospholipid biosynthesis   | + | 184.0261 | 1.128112 | 2.78E+04 | 2.50E+04 | 1.96E+04 | 6.90E+03 | 1.25E+04 | 4.47E+03 | 1.18E+04 | 7.59E+03 | 6.59E+03 | 7.04E+03 | 1.20E+04 | 7.79E+04 | 1.07E+04 | 5.51E+04 | 7.22E+04 | 7.07E+04 | 1.05E+04 | 4.66E+04 | 5.31E+04 | 6.40E+04 | 1.26E+04 | 7.59E+03 | 8.51E+04 | 6.40E+04 | 6.40E+04 |          |
| 111 | N-Arachidonate                     | C00334  | Arachidonate metabolism            | + | 104.0728 | 1.220758 | 9.53E+05 | 1.08E+06 | 1.15E+06 | 8.60E+05 | 1.15E+06 | 1.16E+06 | 1.12E+06 | 1.04E+06 | 1.05E+06 | 1.04E+06 | 6.64E+05 | 9.92E+05 | 1.04E+06 | 9.04E+05 | 7.84E+05 | 1.05E+06 | 1.02E+06 | 6.20E+05 | 9.12E+05 | 1.01E+06 | 1.0E+06  | 1.05E+06 | 9.64E+05 | 1.01E+06 | 1.01E+06 |          |
| 112 | Succinate semialdehyde             | C00232  | Arachidonate metabolism            | + | 301.0226 | 1.221605 | 5.25E+05 | 4.95E+05 | 4.28E+05 | 4.54E+05 | 4.30E+05 | 5.16E+05 | 4.45E+05 | 4.33E+05 | 4.53E+05 | 5.01E+05 | 4.43E+05 | 4.32E+05 | 5.20E+05 | 5.20E+05 | 4.83E+05 | 5.13E+05 | 5.20E+05 | 4.65E+05 | 5.21E+05 | 4.74E+05 | 4.54E+05 | 4.53E+05 | 4.83E+05 | 5.20E+05 | 5.20E+05 |          |
| 113 | L-Allothreonine                    | C00519  | Inositol                           | + | 320.0656 | 1.23245  | 2.44E+06 | 2.21E+06 | 2.19E+06 | 2.33E+06 | 2.14E+06 | 2.88E+06 | 2.78E+06 | 2.42E+06 | 2.59E+06 | 2.39E+06 | 3.18E+06 | 3.67E+06 | 3.67E+06 | 3.99E+06 | 3.88E+06 | 3.66E+06 | 3.45E+06 | 3.74E+06 | 2.94E+06 | 3.85E+06 | 2.21E+06 | 2.59E+06 | 3.88E+06 | 3.66E+06 | 3.66E+06 |          |
| 114 | Inosine                            | C00321  | Inositol                           | + | 141.0054 | 1.232081 | 1.54E+06 | 1.75E+06 | 1.64E+06 | 1.64E+06 | 1.78E+06 | 1.67E+06 | 1.93E+06 | 1.90E+06 | 1.70E+06 | 1.99E+06 | 1.86E+06 | 1.94E+06 | 1.86E+06 | 1.86E+06 | 1.86E+06 | 1.83E+06 | 1.97E+06 | 1.74E+06 | 1.56E+06 | 1.32E+06 | 1.64E+06 | 1.51E+06 | 1.59E+06 | 1.26E+06 | 1.26E+06 |          |
| 115 | Uracil                             | C00106  | Pantothenate metabolism            | + | 111.0183 | 1.212711 | 2.47E+06 | 2.21E+06 | 2.19E+06 | 2.17E+06 | 2.22E+06 | 1.96E+06 | 1.73E+06 | 1.62E+06 | 2.32E+06 | 2.59E+06 | 2.32E+06 | 2.41E+06 | 2.44E+06 | 3.27E+06 | 2.62E+06 | 2.34E+06 | 2.47E+06 | 3.06E+06 | 2.21E+06 | 1.73E+06 | 2.41E+06 | 2.62E+06 | 2.21E+06 | 2.62E+06 | 2.62E+06 |          |
| 116 | Pantothenate                       | C00864  | Pantothenate metabolism            | + | 220.1171 | 1.265178 | 2.83E+05 | 2.70E+05 | 2.78E+05 | 2.81E+05 | 3.02E+05 | 2.23E+05 | 2.66E+05 | 2.53E+05 | 2.41E+05 | 2.64E+05 | 2.09E+05 | 2.02E+05 | 1.92E+05 | 1.14E+05 | 1.64E+05 | 1.82E+05 | 1.44E+05 | 1.40E+05 | 1.37E+05 | 9.57E+04 | 2.81E+05 | 2.53E+05 | 1.92E+05 | 1.40E+05 | 1.40E+05 |          |
| 117 | D-4-Phosphopantothenate            | C03492  | Pantothenate metabolism            | + | 298.0699 | 1.204176 | 1.31E+04 | 1.77E+04 | 3.12E+04 | 1.55E+04 | 2.65E+04 | 8.60E+03 | 1.56E+04 | 1.07E+04 | 8.70E+03 | 4.04E+04 | 2.89E+04 | 1.36E+04 | 2.87E+04 | 2.71E+04 | 2.21E+04 | 2.62E+04 | 3.53E+04 | 2.70E+04 | 3.63E+04 | 2.35E+04 | 1.77E+04 | 1.07E+04 | 2.71E+04 | 2.70E+04 | 2.70E+04 |          |
| 118 | Unsaturated fatty acids            | C12123  | Unsaturated fatty acids            | + | 200.0315 | 1.231959 | 0.00E+00 | 0.00E+00 | 0.00E+00 | 0.00E+00 | 0.00E+00 | 1.95E+04 | 2.14E+04 | 3.12E+04 | 0.00E+00 | 3.25E+04 | 5.20E+04 | 1.18E+05 | 1.19E+04 | 4.21E+04 | 5.33E+04 | 2.67E+04 | 2.52E+04 | 7.90E+04 | 3.19E+04 | 4.44E+04 | 0.00E+00 | 2.14E+04 | 5.33E+04 | 3.19E+04 | 3.19E+04 |          |
| 119 | Unsaturated fatty acids            | C12124  | Unsaturated fatty acids            | + | 260.0029 | 1.402703 | 8.11E+04 | 8.98E+04 | 7.42E+04 | 8.40E+04 | 8.67E+04 | 8.99E+04 | 6.22E+04 | 2.89E+04 | 8.39E+04 | 6.53E+04 | 6.18E+04 | 6.27E+04 | 8.89E+04 | 8.69E+04 | 8.45E+04 | 8.45E+04 | 8.45E+04 | 8.45E+04 | 8.45E+04 | 8.45E+04 | 7.42E+04 | 6.86E+04 | 7.42E+04 | 5.43E+04 | 5.43E+04 |          |
| 120 | Camitine                           | C00918  | Camitine and fatty acid metabolism | + | 102.1121 | 1.232867 | 7.85E+06 | 7.99E+06 | 6.79E+06 | 7.10E+06 | 6.40E+06 | 7.11E+06 | 6.63E+06 | 5.77E+06 | 5.97E+06 | 6.13E+06 | 6.14E+06 | 5.46E+06 | 5.97E+06 | 4.85E+06 | 5.18E+06 | 7.07E+06 | 6.24E+06 | 5.99E+06 | 5.82E+06 | 6.25E+06 | 7.09E+06 | 6.13E+06 | 5.46E+06 | 5.46E+06 |          |          |
| 121 | D-Propionylcamitine                | C00917  | Camitine and fatty acid metabolism | + | 218.138  | 1.236401 | 1.06E+06 | 1.01E+06 | 9.71E+05 | 8.45E+05 | 9.54E+05 | 6.24E+05 | 6.02E+05 | 5.50E+05 | 5.31E+05 | 5.05E+05 | 6.28E+05 | 5.44E+05 | 6.10E+05 | 3.49E+05 | 4.70E+05 | 5.52E+05 | 5.75E+05 | 5.97E+05 | 4.47E+05 | 6.26E+05 | 9.71E+05 | 5.50E+05 | 5.44E+05 | 5.75E+05 | 5.75E+05 |          |
| 122 | D-Butyrylcamitine                  | C00862  | Camitine and fatty acid metabolism | + | 232.1528 | 1.240053 | 4.07E+06 | 3.63E+06 | 4.01E+06 | 4.38E+06 | 3.49E+06 | 6.85E+06 | 5.97E+06 | 6.16E+06 | 6.16E+06 | 5.56E+06 | 6.06E+06 | 5.06E+06 | 5.40E+06 | 4.38E+06 | 3.77E+06 | 4.03E+06 | 3.69E+06 | 4.60E+06 | 4.01E+06 | 5.81E+06 | 4.01E+06 | 5.81E+06 | 4.01E+06 | 4.01E+06 |          |          |
| 123 | Taurine                            | C00245  | Other                              | + | 126.0219 | 1.278821 | 2.71E+05 | 2.62E+05 | 2.09E+05 | 2.52E+05 | 2.14E+05 | 4.15E+05 | 3.48E+05 | 3.14E+05 | 3.26E+05 | 3.48E+05 | 2.44E+05 | 2.47E+05 | 2.08E+05 | 2.35E+05 | 2.20E+05 | 1.60E+05 | 1.60E+05 | 1.35E+05 | 9.03E+04 | 1.65E+05 | 2.52E+05 | 3.48E+05 | 2.35E+05 | 1.60E+05 | 1.60E+05 |          |
| 124 | Hypotaurine                        | C00519  | Other                              | + | 110.0272 | 1.270455 | 9.85E+04 | 4.30E+04 | 8.71E+04 | 5.54E+04 | 3.73E+04 | 8.88E+04 | 1.17E+05 | 1.43E+05 | 1.16E+05 | 8.81E+04 | 6.75E+04 | 7.61E+04 | 2.44E+04 | 4.78E+04 | 6.42E+04 | 4.71E+04 | 5.06E+04 | 4.59E+04 | 3.09E+04 | 5.43E+04 | 5.54E+04 | 1.16E+05 | 6.42E+04 | 4.71E+04 | 4.71E+04 |          |
| 125 | De-zeatin                          | C15545  | Other                              | + | 220.1173 | 1.257357 | 0.00E+00 | 0.00E+00 | 3.55E+04 | 1.07E+05 | 2.00E+05 | 2.00E+00 | 1.07E+05 | 1.01E+05 | 1.48E+05 | 2.64E+05 | 7.80E+04 | 1.94E+05 | 6.87E+04 | 1.71E+05 | 1.64E+05 | 5.28E+04 | 1.44E+05 | 8.88E+04 | 1.37E+05 | 5.96E+04 | 9.55E+04 | 1.07E+05 | 1.44E+05 | 6.88E+04 | 6.88E+04 |          |
| 126 | β-Pyruvoylterahydropterin          | C00484  | Other                              | + | 236.0783 | 1.210226 | 5.69E+05 | 4.48E+05 | 4.12E+05 | 4.48E+05 | 4.52E+05 | 4.43E+05 | 3.89E+05 | 5.11E+05 | 4.24E+05 | 4.39E+05 | 6.30E+05 | 3.99E+05 | 5.60E+05 | 5.02E+05 | 5.47E+05 | 5.71E+05 | 5.84E+05 | 4.71E+05 | 6.20E+05 | 6.11E+05 | 4.49E+05 | 4.39E+05 | 5.47E+05 | 5.84E+05 | 5.84E+05 |          |
| 127 | L-Lactoyl-5-ε-7-β-tetrahydropterin | C04244  | Other                              | + | 240.1087 | 1.227578 | 2.98E+07 | 3.65E+07 | 3.40E+07 | 3.39E+07 | 3.27E+07 | 3.05E+07 | 3.02E+07 | 3.43E+07 | 3.33E+07 | 3.19E+07 | 3.02E+07 | 3.35E+07 | 3.75E+07 | 3.81E+07 | 3.81E+07 | 3.79E+07 | 4.55E+07 | 4.46E+07 | 4.00E+07 | 4.16E+07 | 3.97E+07 | 3.19E+07 | 3.35E+07 | 4.16E+07 | 4.16E+07 |          |
| 128 | γ-Hydroxyglutamate semialdehyde    | C00938  | Other                              | + | 148.06   | 1.224408 | 7.97E+07 | 8.00E+07 | 7.69E+07 | 8.79E+07 | 8.31E+07 | 8.34E+07 | 8.91E+07 | 7.78E+07 | 8.36E+   |          |          |          |          |          |          |          |          |          |          |          |          |          |          |          |          |          |
